# Supplementary material for: Proteomic and Bioinformatic Analysis of Decellularized Pancreatic Extracellular Matrices
Source: Molecules. 2021 Nov 8;26(21):6740. doi: 10.3390/molecules26216740 (PMC8588251; doi:10.3390/molecules26216740)
Supplement: Supplementary file 1 [file molecules-26-06740-s001.zip]

Archive with 5 entries (5 files):
- Supplemental Table S1 dpECM proteins-adult using detergent-based method.xlsx
- Supplemental Table S2 dpECM proteins-adult using detergent-free method.xlsx
- Supplemental Table S3 dpECM proteins-young using detergent-free method.xlsx
- Supplementary information dppECM 10-15-2021.pdf
- Supplymental Table S4 proteins significantly regulated GO terms 10-14-2021.xlsx
