# Supplementary material for: Proteomic and Bioinformatic Analysis of Decellularized Pancreatic Extracellular Matrices
Source: Molecules. 2021 Nov 8;26(21):6740. doi: 10.3390/molecules26216740 (PMC8588251; doi:10.3390/molecules26216740)
Supplement: Supplementary file 1 [file molecules-26-06740-s001.zip › Supplemental Table S1 dpECM proteins-adult using detergent-based method.xlsx]

## Sheet: Detergent-1
Gene symbol	UniProtKB entry name	Description
FBN1	FBN1_PIG	RecName: Full=Fibrillin-1; Contains: RecName: Full=Asprosin; Flags: Precursor
COL1A1	Q1HNM7_PIG	PREDICTED: collagen alpha-1(I) chain [Sus scrofa]
COL1A2	I3L781_PIG	collagen alpha-2(I) chain precursor [Sus scrofa]
COL1A1	A0A287A1S6_PIG	PREDICTED: collagen alpha-1(I) chain [Sus scrofa]
COL6A3	I3LUR7_PIG	PREDICTED: collagen alpha-3(VI) chain isoform X1 [Sus scrofa]
COL6A2	I3LQ84_PIG	PREDICTED: collagen alpha-2(VI) chain [Sus scrofa]
CHIA	I3LL32_PIG	chitinase, acidic precursor [Sus scrofa]
COL3A1	F1RYI8_PIG	collagen alpha-1(III) chain precursor [Sus scrofa]
HSPG2	F1SU03_PIG	PREDICTED: basement membrane-specific heparan sulfate proteoglycan core protein [Sus scrofa]
FBN2	F1RKK1_PIG	PREDICTED: fibrillin-2, partial [Sus scrofa]
LAMC1	F1S663_PIG	laminin subunit gamma-1 precursor [Sus scrofa]
LAMB2	F1SPT5_PIG	PREDICTED: LOW QUALITY PROTEIN: laminin subunit beta-2 [Sus scrofa]
COL4A2	F1RLL9_PIG	PREDICTED: collagen alpha-2(IV) chain [Sus scrofa]
PGC	A0A286ZP41_PIG	PREDICTED: gastricsin isoform X1 [Sus scrofa]
LOC100153899	F1SCD0_PIG	PREDICTED: serpin A3-8 [Sus scrofa]
COL4A1	M3V819_PIG	PREDICTED: collagen alpha-1(IV) chain [Sus scrofa]
COL5A2	A0A287BF88_PIG	collagen alpha-2(V) chain precursor [Sus scrofa]
COL6A1	Q1T7A9_PIG	type VI collagen alpha-1 chain, partial [Sus scrofa]
FGA	F1RX36_PIG	PREDICTED: fibrinogen alpha chain [Sus scrofa]
SERPINA3-2	Q9GMA6_PIG	alpha-1-antichymotrypsin 2 precursor [Sus scrofa]
COL5A1	Q59IP3_PIG	collagen alpha-1(V) chain precursor [Sus scrofa]
LAMB1	F1SAE9_PIG	PREDICTED: laminin subunit beta-1 [Sus scrofa]
FBLN5	F1SD87_PIG	PREDICTED: fibulin-5 isoform X1 [Sus scrofa]
FGB	F1RX37_PIG	fibrinogen beta chain precursor [Sus scrofa]
LUM	F1SQ09_PIG	lumican precursor [Sus scrofa]
CLPS	COL_PIG	RecName: Full=Colipase; AltName: Full=Procolipase II; Flags: Precursor
EMILIN1	F1SDQ5_PIG	PREDICTED: EMILIN-1 isoform X1 [Sus scrofa]
P4HB	G9F6X8_PIG	prolyl 4-hydroxylase beta polypeptide [Sus scrofa]
MUC6	I3LQZ3_PIG	PREDICTED: LOW QUALITY PROTEIN: mucin-6 [Sus scrofa]
TINAGL1	F1SVA2_PIG	PREDICTED: tubulointerstitial nephritis antigen-like isoform X1 [Sus scrofa]
ELN	A0A287AXU0_PIG	PREDICTED: elastin-like [Sus scrofa]
COL28A1	F1SF83_PIG	PREDICTED: collagen alpha-1(XXVIII) chain [Sus scrofa]
EFEMP1	F8SIP2_PIG	EGF-containing fibulin-like extracellular matrix protein 1 precursor [Sus scrofa]
FN1	F1SS24_PIG	PREDICTED: fibronectin isoform X1 [Sus scrofa]
ITGB1	K7GS94_PIG	PREDICTED: integrin beta-1 isoform X1 [Sus scrofa]
AMBP	F1SN71_PIG	protein AMBP precursor [Sus scrofa]
EPX	F1RSB4_PIG	PREDICTED: eosinophil peroxidase [Sus scrofa]
MFAP5	A0A287AGA0_PIG	microfibrillar-associated protein 5 precursor [Sus scrofa]
FREM2	F1RS31_PIG	PREDICTED: LOW QUALITY PROTEIN: FRAS1-related extracellular matrix protein 2-like [Sus scrofa]
COL6A1	Q1T7A8_PIG	type VI collagen alpha-1 chain, partial [Sus scrofa]

## Sheet: Detergent-2
Gene symbol	UniProtKB entry name	Description
COL1A1	Q1HNM7_PIG	PREDICTED: collagen alpha-1(I) chain [Sus scrofa]
COL1A2	I3L781_PIG	collagen alpha-2(I) chain precursor [Sus scrofa]
FBN1	FBN1_PIG	RecName: Full=Fibrillin-1; Contains: RecName: Full=Asprosin; Flags: Precursor
COL1A1	A0A287A1S6_PIG	PREDICTED: collagen alpha-1(I) chain [Sus scrofa]
CHIA	I3LL32_PIG	chitinase, acidic precursor [Sus scrofa]
PGC	A0A286ZP41_PIG	PREDICTED: gastricsin isoform X1 [Sus scrofa]
COL3A1	F1RYI8_PIG	collagen alpha-1(III) chain precursor [Sus scrofa]
COL6A3	I3LUR7_PIG	PREDICTED: collagen alpha-3(VI) chain isoform X1 [Sus scrofa]
PAG2	PAG2_PIG	RecName: Full=Pregnancy-associated glycoprotein 2; Short=PAG 2; Flags: Precursor
LOC106504545	F1SCC9_PIG	PREDICTED: serpin A3-8-like [Sus scrofa]
COL6A2	I3LQ84_PIG	PREDICTED: collagen alpha-2(VI) chain [Sus scrofa]
COL2A1	A0A286ZWS8_PIG	PREDICTED: collagen alpha-1(II) chain-like, partial [Sus scrofa]
CLPS	COL_PIG	RecName: Full=Colipase; AltName: Full=Procolipase II; Flags: Precursor
LAMB1	F1SAE9_PIG	PREDICTED: laminin subunit beta-1 [Sus scrofa]
FBN2	F1RKK1_PIG	PREDICTED: fibrillin-2, partial [Sus scrofa]
EPX	F1RSB4_PIG	PREDICTED: eosinophil peroxidase [Sus scrofa]
COL4A2	F1RLL9_PIG	PREDICTED: collagen alpha-2(IV) chain [Sus scrofa]
COL6A1	Q1T7A9_PIG	type VI collagen alpha-1 chain, partial [Sus scrofa]

## Sheet: Detergent-3
Gene symbol	UniProtKB entry name	Description
COL1A2	I3L781_PIG	collagen alpha-2(I) chain precursor [Sus scrofa]
COL1A1	A0A287A1S6_PIG	PREDICTED: collagen alpha-1(I) chain [Sus scrofa]
FBN1	FBN1_PIG	RecName: Full=Fibrillin-1; Contains: RecName: Full=Asprosin; Flags: Precursor
CHIA	I3LL32_PIG	chitinase, acidic precursor [Sus scrofa]
PGC	A0A286ZP41_PIG	PREDICTED: gastricsin isoform X1 [Sus scrofa]
COL3A1	F1RYI8_PIG	collagen alpha-1(III) chain precursor [Sus scrofa]
PAG2	PAG2_PIG	RecName: Full=Pregnancy-associated glycoprotein 2; Short=PAG 2; Flags: Precursor
COL6A3	I3LUR7_PIG	PREDICTED: collagen alpha-3(VI) chain isoform X1 [Sus scrofa]
LOC106504545	F1SCC9_PIG	PREDICTED: serpin A3-8-like [Sus scrofa]
LOC100153899	F1SCD0_PIG	PREDICTED: serpin A3-8 [Sus scrofa]
COL6A2	I3LQ84_PIG	PREDICTED: collagen alpha-2(VI) chain [Sus scrofa]
COL4A2	F1RLL9_PIG	PREDICTED: collagen alpha-2(IV) chain [Sus scrofa]
LOC396684	F1SCC7_PIG	PREDICTED: serpin A3-5 [Sus scrofa]
COL4A1	M3V819_PIG	PREDICTED: collagen alpha-1(IV) chain [Sus scrofa]
LAMC1	F1S663_PIG	laminin subunit gamma-1 precursor [Sus scrofa]
LOC100153899	A0A287AVA9_PIG	PREDICTED: serpin A3-8 [Sus scrofa]
COL2A1	A0A286ZWS8_PIG	PREDICTED: collagen alpha-1(II) chain-like, partial [Sus scrofa]
COL5A1	Q59IP3_PIG	collagen alpha-1(V) chain precursor [Sus scrofa]
HSPG2	F1SU03_PIG	PREDICTED: basement membrane-specific heparan sulfate proteoglycan core protein [Sus scrofa]
ITGB1	K7GS94_PIG	PREDICTED: integrin beta-1 isoform X1 [Sus scrofa]
AMBP	F1SN71_PIG	protein AMBP precursor [Sus scrofa]
CALR	CALR_PIG	RecName: Full=Calreticulin; AltName: Full=CRP55; AltName: Full=Calregulin; AltName: Full=Endoplasmic reticulum resident protein 60; Short=ERp60; AltName: Full=HACBP; Flags: Precursor
CLPS	COL_PIG	RecName: Full=Colipase; AltName: Full=Procolipase II; Flags: Precursor
IGFBP7	A0A286ZXA0_PIG	insulin-like growth factor-binding protein 7 precursor [Sus scrofa]
