# Supplementary material for: Proteomic and Bioinformatic Analysis of Decellularized Pancreatic Extracellular Matrices
Source: Molecules. 2021 Nov 8;26(21):6740. doi: 10.3390/molecules26216740 (PMC8588251; doi:10.3390/molecules26216740)
Supplement: Supplementary file 1 [file molecules-26-06740-s001.zip › Supplemental Table S2 dpECM proteins-adult using detergent-free method.xlsx]

## Sheet: Male-1
Gene symbol	UniProtKB entry name	Description
COL1A1	A0A287A1S6_PIG	PREDICTED: collagen alpha-1(I) chain [Sus scrofa]
COL1A2	I3L781_PIG	collagen alpha-2(I) chain precursor [Sus scrofa]
COL6A3	I3LUR7_PIG	PREDICTED: collagen alpha-3(VI) chain isoform X1 [Sus scrofa]
CHIA	I3LL32_PIG	chitinase, acidic precursor [Sus scrofa]
PNLIP	F1S4T9_PIG	pancreatic triacylglycerol lipase precursor [Sus scrofa]
SLA-DQB	HB2C_PIG	RecName: Full=SLA class II histocompatibility antigen, DQ haplotype C beta chain; Flags: Precursor
SLA-DQB1	H6X3F4_PIG	MHC class II antigen [Sus scrofa]
SLA-DQB1	A0A1C9J6F1_PIG	MHC class II antigen [Sus scrofa]
COL3A1	F1RYI8_PIG	collagen alpha-1(III) chain precursor [Sus scrofa]
HSPG2	F1SU03_PIG	PREDICTED: basement membrane-specific heparan sulfate proteoglycan core protein [Sus scrofa]
SLA-DRB	Q6Y1I7_PIG	MHC class II antigen [Sus scrofa]
STOM_tv1	K9J6J2_PIG	PREDICTED: erythrocyte band 7 integral membrane protein [Sus scrofa]
SLA-DQA	B1A9L6_PIG	MHC class II antigen [Sus scrofa]
COL2A1	A0A286ZWS8_PIG	PREDICTED: collagen alpha-1(II) chain-like, partial [Sus scrofa]
COL5A2	A0A287BF88_PIG	collagen alpha-2(V) chain precursor [Sus scrofa]
SLA-1	L7WHJ6_PIG	MHC class I antigen [Sus scrofa]
SLA-DQA	A0A172Q3W6_PIG	MHC class II antigen [Sus scrofa]
LAMC1	F1S663_PIG	laminin subunit gamma-1 precursor [Sus scrofa]
CLPS	COL_PIG	RecName: Full=Colipase; AltName: Full=Procolipase II; Flags: Precursor
GP2	F1RPA7_PIG	PREDICTED: pancreatic secretory granule membrane major glycoprotein GP2 isoform X1 [Sus scrofa]
COL4A1	M3V819_PIG	PREDICTED: collagen alpha-1(IV) chain [Sus scrofa]
PPAP2C	B8XSI7_PIG	PREDICTED: lipid phosphate phosphohydrolase 2 isoform X1 [Sus scrofa]
VDAC1	VDAC1_PIG	RecName: Full=Voltage-dependent anion-selective channel protein 1; Short=VDAC-1
SLA-DR-alpha	Q31064_PIG	MHC class II DR-alpha, partial [Sus scrofa]
SLA-2	Q0GAA2_PIG	MHC class I antigen [Sus scrofa]
CAV1	CAV1_PIG	RecName: Full=Caveolin-1
LAMB1	F1SAE9_PIG	PREDICTED: laminin subunit beta-1 [Sus scrofa]
LOC100153899	F1SCD0_PIG	PREDICTED: serpin A3-8 [Sus scrofa]
TINAGL1	F1SVA2_PIG	PREDICTED: tubulointerstitial nephritis antigen-like isoform X1 [Sus scrofa]
COL4A2	F1RLL9_PIG	PREDICTED: collagen alpha-2(IV) chain [Sus scrofa]
ITGB1	K7GS94_PIG	PREDICTED: integrin beta-1 isoform X1 [Sus scrofa]
CAV2	G8GCE6_PIG	caveolin-2 [Sus scrofa]
CA4	F1S1C3_PIG	carbonic anhydrase 4 precursor [Sus scrofa]
KCNIP2	F1S8T5_PIG	PREDICTED: Kv channel-interacting protein 2 isoform X5 [Sus scrofa]
Jup	PLAK_PIG	RecName: Full=Junction plakoglobin
COL4A5	F1RXI2_PIG	PREDICTED: collagen alpha-5(IV) chain [Sus scrofa]
LAMA4	F1RZM4_PIG	PREDICTED: LOW QUALITY PROTEIN: laminin subunit alpha-4 [Sus scrofa]

## Sheet: Male-2
Gene symbol	UniProtKB entry name	Description
COL1A2	I3L781_PIG	collagen alpha-2(I) chain precursor [Sus scrofa]
COL6A3	I3LUR7_PIG	PREDICTED: collagen alpha-3(VI) chain isoform X1 [Sus scrofa]
COL1A1	Q1HNM7_PIG	PREDICTED: collagen alpha-1(I) chain [Sus scrofa]
COL1A1	A0A287A1S6_PIG	PREDICTED: collagen alpha-1(I) chain [Sus scrofa]
CHIA	I3LL32_PIG	chitinase, acidic precursor [Sus scrofa]
COL6A2	I3LQ84_PIG	PREDICTED: collagen alpha-2(VI) chain [Sus scrofa]
HSPG2	F1SU03_PIG	PREDICTED: basement membrane-specific heparan sulfate proteoglycan core protein [Sus scrofa]
FBN1	FBN1_PIG	RecName: Full=Fibrillin-1; Contains: RecName: Full=Asprosin; Flags: Precursor
COL5A2	A0A287BF88_PIG	collagen alpha-2(V) chain precursor [Sus scrofa]
SLA-DQB	Q8SPC4_PIG	MHC class II antigen [Sus scrofa]
GP2	F1RPA7_PIG	PREDICTED: pancreatic secretory granule membrane major glycoprotein GP2 isoform X1 [Sus scrofa]
SLA-DQB	Q8MGP9_PIG	MHC class II antigen [Sus scrofa]
ITGB1	K7GS94_PIG	PREDICTED: integrin beta-1 isoform X1 [Sus scrofa]
STOM_tv1	K9J6J2_PIG	PREDICTED: erythrocyte band 7 integral membrane protein [Sus scrofa]
COL3A1	F1RYI8_PIG	collagen alpha-1(III) chain precursor [Sus scrofa]
LAMC1	F1S663_PIG	laminin subunit gamma-1 precursor [Sus scrofa]
COL4A1	M3V819_PIG	PREDICTED: collagen alpha-1(IV) chain [Sus scrofa]
LA-DRB-d	Q31072_PIG	MHC class II antigen [Sus scrofa]
CA4	F1S1C3_PIG	carbonic anhydrase 4 precursor [Sus scrofa]
PD14	O19245_PIG	MHC class I antigen [Sus scrofa]
SLA-DR-alpha	Q31064_PIG	MHC class II DR-alpha, partial [Sus scrofa]
CAHI-DQA2	Q06AT2_PIG	HA25 [Sus scrofa]
PGC	A0A286ZP41_PIG	PREDICTED: gastricsin isoform X1 [Sus scrofa]
LAMB1	F1SAE9_PIG	PREDICTED: laminin subunit beta-1 [Sus scrofa]
BGN	F1S2B6_PIG	PREDICTED: biglycan isoform X1 [Sus scrofa]
COL2A1	A0A286ZWS8_PIG	PREDICTED: collagen alpha-1(II) chain-like, partial [Sus scrofa]
SLA-DQA	A7ISN5_PIG	MHC class II antigen alpha chain [Sus scrofa]
COL4A2	F1RLL9_PIG	PREDICTED: collagen alpha-2(IV) chain [Sus scrofa]
SLA-1	F8WSC3_PIG	MHC class I antigen [Sus scrofa]
PNLIP	F1S4T9_PIG	pancreatic triacylglycerol lipase precursor [Sus scrofa]
DCN	PGS2_PIG	RecName: Full=Decorin; AltName: Full=Bone proteoglycan II; AltName: Full=PG-S2; Flags: Precursor
SLA-1	B1PJU8_PIG	MHC class I antigen [Sus scrofa]
PLA2G1B	PA21B_PIG	RecName: Full=Phospholipase A2, major isoenzyme; AltName: Full=Group IB phospholipase A2; AltName: Full=Phosphatidylcholine 2-acylhydrolase 1B; Flags: Precursor
TINAGL1	F1SVA2_PIG	PREDICTED: tubulointerstitial nephritis antigen-like isoform X1 [Sus scrofa]
MUC6	I3LQZ3_PIG	PREDICTED: LOW QUALITY PROTEIN: mucin-6 [Sus scrofa]
COL5A1	Q59IP3_PIG	collagen alpha-1(V) chain precursor [Sus scrofa]
CD90	B9ZSM8_PIG	PREDICTED: thy-1 membrane glycoprotein isoform X1 [Sus scrofa]
VDAC1	VDAC1_PIG	RecName: Full=Voltage-dependent anion-selective channel protein 1; Short=VDAC-1
CD59	CD59_PIG	RecName: Full=CD59 glycoprotein; AltName: Full=MAC-inhibitory protein; Short=MAC-IP; AltName: Full=Membrane attack complex inhibition factor; Short=MACIF; AltName: Full=Protectin; AltName: CD_antigen=CD59; Flags: Precursor
GRN	F1RQZ0_PIG	granulins precursor [Sus scrofa]
LOC106504545	F1SCC9_PIG	PREDICTED: serpin A3-8-like [Sus scrofa]
SNAP23	A0A287AHK8_PIG	PREDICTED: synaptosomal-associated protein 23 isoform X1 [Sus scrofa]
CAV1	CAV1_PIG	RecName: Full=Caveolin-1
DSP	F1RW75_PIG	PREDICTED: LOW QUALITY PROTEIN: desmoplakin [Sus scrofa]
ATP1A1	AT1A1_PIG	RecName: Full=Sodium/potassium-transporting ATPase subunit alpha-1; Short=Na(+)/K(+) ATPase alpha-1 subunit; AltName: Full=Sodium pump subunit alpha-1; Flags: Precursor
B2M	B2MG_PIG	RecName: Full=Beta-2-microglobulin; AltName: Full=Lactollin; Flags: Precursor
COL6A6	A0A287A0A6_PIG	PREDICTED: collagen alpha-6(VI) chain [Sus scrofa]
PRELP	F1S6B4_PIG	PREDICTED: prolargin [Sus scrofa]
MPZ	F1S1B2_PIG	PREDICTED: myelin protein P0 [Sus scrofa]
PHB	F2Z543_PIG	PREDICTED: prohibitin [Sus scrofa]
Jup	PLAK_PIG	RecName: Full=Junction plakoglobin
ITM2B	F1RK12_PIG	PREDICTED: integral membrane protein 2B isoform X1 [Sus scrofa]
CAV2	G8GCE6_PIG	caveolin-2 [Sus scrofa]
STAB1	A0A287ALB0_PIG	PREDICTED: stabilin-1 [Sus scrofa]
VAMP5	A0A287AUN4_PIG	PREDICTED: vesicle-associated membrane protein 5-like [Sus scrofa]
TFF2	I3LMK2_PIG	PREDICTED: trefoil factor 2 [Sus scrofa]
LOX	F1RLC4_PIG	protein-lysine 6-oxidase precursor [Sus scrofa]
SCARB1	SCRB1_PIG	RecName: Full=Scavenger receptor class B member 1; Short=SRB1; AltName: Full=High density lipoprotein receptor SR-BI; AltName: Full=SR-BI
ITGB4	K7GP66_PIG	PREDICTED: integrin beta-4 isoform X3 [Sus scrofa]
ATP5F1A	ATPA_PIG	RecName: Full=ATP synthase subunit alpha, mitochondrial; AltName: Full=ATP synthase subunit alpha heart isoform, mitochondrial; AltName: Full=ATP synthase subunit alpha liver isoform, mitochondrial; Flags: Precursor
DSG1	DSG1_PIG	RecName: Full=Desmoglein-1; AltName: Full=Desmosomal glycoprotein 1; Short=DG1; Short=DGI; Flags: Precursor
SLA-DMB	A5D9L3_PIG	MHC class II, DM beta precursor [Sus scrofa]
LAMP1	F1RN44_PIG	lysosome-associated membrane glycoprotein 1 precursor [Sus scrofa]
SUSD2	I3LDP5_PIG	PREDICTED: sushi domain-containing protein 2 isoform X1 [Sus scrofa]
RPS3	RS3_PIG	RecName: Full=40S ribosomal protein S3
NID2	A0A287ALN1_PIG	PREDICTED: nidogen-2 isoform X1 [Sus scrofa]
UMOD	F1RPA9_PIG	PREDICTED: uromodulin [Sus scrofa]
PHB2	I3LQN4_PIG	prohibitin-2 [Sus scrofa]
NID1	F1RGY5_PIG	PREDICTED: LOW QUALITY PROTEIN: nidogen-1-like [Sus scrofa]
VWF	K7GNN0_PIG	von Willebrand factor precursor [Sus scrofa]
EPX	F1RSB4_PIG	PREDICTED: eosinophil peroxidase [Sus scrofa]
FBN2	F1RKK1_PIG	PREDICTED: fibrillin-2, partial [Sus scrofa]

## Sheet: Male-3
Gene symbol	UniProtKB entry name	Description
COL1A1	Q1HNM7_PIG	PREDICTED: collagen alpha-1(I) chain [Sus scrofa]
COL1A2	I3L781_PIG	collagen alpha-2(I) chain precursor [Sus scrofa]
COL6A3	I3LUR7_PIG	PREDICTED: collagen alpha-3(VI) chain isoform X1 [Sus scrofa]
COL1A1	A0A287A1S6_PIG	PREDICTED: collagen alpha-1(I) chain [Sus scrofa]
CHIA	I3LL32_PIG	chitinase, acidic precursor [Sus scrofa]
GP2	F1RPA7_PIG	PREDICTED: pancreatic secretory granule membrane major glycoprotein GP2 isoform X1 [Sus scrofa]
FBN1	FBN1_PIG	RecName: Full=Fibrillin-1; Contains: RecName: Full=Asprosin; Flags: Precursor
COL3A1	F1RYI8_PIG	collagen alpha-1(III) chain precursor [Sus scrofa]
HSPG2	F1SU03_PIG	PREDICTED: basement membrane-specific heparan sulfate proteoglycan core protein [Sus scrofa]
COL6A2	I3LQ84_PIG	PREDICTED: collagen alpha-2(VI) chain [Sus scrofa]
PGC	A0A286ZP41_PIG	PREDICTED: gastricsin isoform X1 [Sus scrofa]
ITGB1	K7GS94_PIG	PREDICTED: integrin beta-1 isoform X1 [Sus scrofa]
SLA-DQB	Q8SPC4_PIG	MHC class II antigen [Sus scrofa]
STOM_tv1	K9J6J2_PIG	PREDICTED: erythrocyte band 7 integral membrane protein [Sus scrofa]
LAMC1	F1S663_PIG	laminin subunit gamma-1 precursor [Sus scrofa]
COL5A2	A0A287BF88_PIG	collagen alpha-2(V) chain precursor [Sus scrofa]
CLPS	COL_PIG	RecName: Full=Colipase; AltName: Full=Procolipase II; Flags: Precursor
SLA-DQB	Q8SPB5_PIG	MHC class II antigen [Sus scrofa]
SLA-DQB	Q8SPA1_PIG	MHC class II antigen [Sus scrofa]
SLA-1	I6W9Q3_PIG	MHC class I antigen [Sus scrofa]
SLA-DQA	A0A172Q3W6_PIG	MHC class II antigen [Sus scrofa]
SLA-DQA	A0A172Q3Y5_PIG	MHC class II antigen [Sus scrofa]
SLA-DRB	Q6Y1I7_PIG	MHC class II antigen [Sus scrofa]
GRN	F1RQZ0_PIG	granulins precursor [Sus scrofa]
SLA-2	A0A0N9JNW5_PIG	MHC class I antigen [Sus scrofa]
SLA-1	L7WPB3_PIG	MHC class I antigen [Sus scrofa]
PLA2G1B	PA21B_PIG	RecName: Full=Phospholipase A2, major isoenzyme; AltName: Full=Group IB phospholipase A2; AltName: Full=Phosphatidylcholine 2-acylhydrolase 1B; Flags: Precursor
PNLIP	F1S4T9_PIG	pancreatic triacylglycerol lipase precursor [Sus scrofa]
SLA-DR-alpha	Q31064_PIG	MHC class II DR-alpha, partial [Sus scrofa]
SNAP23	A0A287AHK8_PIG	PREDICTED: synaptosomal-associated protein 23 isoform X1 [Sus scrofa]
SLA-1	D6C4F4_PIG	MHC class I antigen [Sus scrofa]
CD59	CD59_PIG	RecName: Full=CD59 glycoprotein; AltName: Full=MAC-inhibitory protein; Short=MAC-IP; AltName: Full=Membrane attack complex inhibition factor; Short=MACIF; AltName: Full=Protectin; AltName: CD_antigen=CD59; Flags: Precursor
COL2A1	A0A286ZWS8_PIG	PREDICTED: collagen alpha-1(II) chain-like, partial [Sus scrofa]
COL6A6	A0A287A0A6_PIG	PREDICTED: collagen alpha-6(VI) chain [Sus scrofa]
LOC100153899	F1SCD0_PIG	PREDICTED: serpin A3-8 [Sus scrofa]
CAV1	CAV1_PIG	RecName: Full=Caveolin-1
CAV2	G8GCE6_PIG	caveolin-2 [Sus scrofa]
BGN	F1S2B6_PIG	PREDICTED: biglycan isoform X1 [Sus scrofa]
VAMP5	A0A287AUN4_PIG	PREDICTED: vesicle-associated membrane protein 5-like [Sus scrofa]
LRP1	K7GS03_PIG	PREDICTED: LOW QUALITY PROTEIN: prolow-density lipoprotein receptor-related protein 1, partial [Sus scrofa]
B2M	B2MG_PIG	RecName: Full=Beta-2-microglobulin; AltName: Full=Lactollin; Flags: Precursor
CD61	Q95JH1_PIG	integrin beta-3 precursor [Sus scrofa]
VDAC1	VDAC1_PIG	RecName: Full=Voltage-dependent anion-selective channel protein 1; Short=VDAC-1
ENPEP	AMPE_PIG	RecName: Full=Glutamyl aminopeptidase; Short=EAP; AltName: Full=Aminopeptidase A; Short=AP-A; AltName: CD_antigen=CD249
PNLIPRP2	F1S4T6_PIG	pancreatic lipase-related protein 2 precursor [Sus scrofa]
TNC	TENA_PIG	RecName: Full=Tenascin; Short=TN; AltName: Full=Cytotactin; AltName: Full=GMEM; AltName: Full=GP 150-225; AltName: Full=Glioma-associated-extracellular matrix antigen; AltName: Full=Hexabrachion; AltName: Full=JI; AltName: Full=Myotendinous antigen; AltName: Full=Neuronectin; AltName: Full=P230; AltName: Full=Tenascin-C; Short=TN-C; Flags: Precursor
LOX	F1RLC4_PIG	protein-lysine 6-oxidase precursor [Sus scrofa]
DCN	F1SQ10_PIG	PREDICTED: decorin isoform X1 [Sus scrofa]
MUC6	I3LQZ3_PIG	PREDICTED: LOW QUALITY PROTEIN: mucin-6 [Sus scrofa]
CRELD2	F1RXR2_PIG	PREDICTED: cysteine-rich with EGF-like domain protein 2 [Sus scrofa]
LAMB1	F1SAE9_PIG	PREDICTED: laminin subunit beta-1 [Sus scrofa]
COL5A3	F1S3G7_PIG	collagen alpha-3(V) chain precursor [Sus scrofa]
TFF2	I3LMK2_PIG	PREDICTED: trefoil factor 2 [Sus scrofa]
COL4A2	F1RLL9_PIG	PREDICTED: collagen alpha-2(IV) chain [Sus scrofa]
COL5A1	Q59IP3_PIG	collagen alpha-1(V) chain precursor [Sus scrofa]

## Sheet: Female-1
Gene symbol	UniProtKB entry name	Description
COL6A3	I3LUR7_PIG	PREDICTED: collagen alpha-3(VI) chain isoform X1 [Sus scrofa]
COL1A1	Q1HNM7_PIG	PREDICTED: collagen alpha-1(I) chain [Sus scrofa]
COL1A2	I3L781_PIG	collagen alpha-2(I) chain precursor [Sus scrofa]
COL1A1	A0A287A1S6_PIG	PREDICTED: collagen alpha-1(I) chain [Sus scrofa]
COL6A2	I3LQ84_PIG	PREDICTED: collagen alpha-2(VI) chain [Sus scrofa]
CHIA	I3LL32_PIG	chitinase, acidic precursor [Sus scrofa]
SLA-DQB1	Q860U2_PIG	MHC class II antigen [Sus scrofa]
SLA-DQB	Q8SPA1_PIG	MHC class II antigen [Sus scrofa]
COL3A1	F1RYI8_PIG	collagen alpha-1(III) chain precursor [Sus scrofa]
ITGB1	K7GS94_PIG	PREDICTED: integrin beta-1 isoform X1 [Sus scrofa]
FBN1	FBN1_PIG	RecName: Full=Fibrillin-1; Contains: RecName: Full=Asprosin; Flags: Precursor
SLA-DR-alpha	Q31064_PIG	MHC class II DR-alpha, partial [Sus scrofa]
COL5A2	A0A287BF88_PIG	collagen alpha-2(V) chain precursor [Sus scrofa]
SLA-DRB	Q6Y1I7_PIG	MHC class II antigen [Sus scrofa]
LAMC1	F1S663_PIG	laminin subunit gamma-1 precursor [Sus scrofa]
GP2	F1RPA7_PIG	PREDICTED: pancreatic secretory granule membrane major glycoprotein GP2 isoform X1 [Sus scrofa]
HSPG2	F1SU03_PIG	PREDICTED: basement membrane-specific heparan sulfate proteoglycan core protein [Sus scrofa]
COL4A1	M3V819_PIG	PREDICTED: collagen alpha-1(IV) chain [Sus scrofa]
SLA-DRB	Q860P3_PIG	MHC class II antigen [Sus scrofa]
SLA-2	A0A0A7BZS1_PIG	MHC class I antigen [Sus scrofa]
SLA-1	L7WHJ6_PIG	MHC class I antigen [Sus scrofa]
VDAC1	VDAC1_PIG	RecName: Full=Voltage-dependent anion-selective channel protein 1; Short=VDAC-1
STOM_tv1	K9J6J2_PIG	PREDICTED: erythrocyte band 7 integral membrane protein [Sus scrofa]
LAMB1	F1SAE9_PIG	PREDICTED: laminin subunit beta-1 [Sus scrofa]
CLPS	COL_PIG	RecName: Full=Colipase; AltName: Full=Procolipase II; Flags: Precursor
SLA-DQA	A0A172Q3W6_PIG	MHC class II antigen [Sus scrofa]
DCN	PGS2_PIG	RecName: Full=Decorin; AltName: Full=Bone proteoglycan II; AltName: Full=PG-S2; Flags: Precursor
TINAGL1	F1SVA2_PIG	PREDICTED: tubulointerstitial nephritis antigen-like isoform X1 [Sus scrofa]
COL4A2	F1RLL9_PIG	PREDICTED: collagen alpha-2(IV) chain [Sus scrofa]
PGC	A0A286ZP41_PIG	PREDICTED: gastricsin isoform X1 [Sus scrofa]
COL5A1	Q59IP3_PIG	collagen alpha-1(V) chain precursor [Sus scrofa]
SLA-DQA	Q0GA96_PIG	MHC class II antigen [Sus scrofa]
CD90	B9ZSM8_PIG	PREDICTED: thy-1 membrane glycoprotein isoform X1 [Sus scrofa]
GRN	F1RQZ0_PIG	granulins precursor [Sus scrofa]
CD59	CD59_PIG	RecName: Full=CD59 glycoprotein; AltName: Full=MAC-inhibitory protein; Short=MAC-IP; AltName: Full=Membrane attack complex inhibition factor; Short=MACIF; AltName: Full=Protectin; AltName: CD_antigen=CD59; Flags: Precursor
CAV2	G8GCE6_PIG	caveolin-2 [Sus scrofa]
LOC100153899	F1SCD0_PIG	PREDICTED: serpin A3-8 [Sus scrofa]
FBN2	F1RKK1_PIG	PREDICTED: fibrillin-2, partial [Sus scrofa]
CA4	F1S1C3_PIG	carbonic anhydrase 4 precursor [Sus scrofa]
LAMP1	F1RN44_PIG	lysosome-associated membrane glycoprotein 1 precursor [Sus scrofa]
BGN	F1S2B6_PIG	PREDICTED: biglycan isoform X1 [Sus scrofa]
PLPP1	F1SLL5_PIG	PREDICTED: lipid phosphate phosphohydrolase 1 isoform X1 [Sus scrofa]
ERLIN2	A0A287BRP6_PIG	PREDICTED: erlin-2 isoform X1 [Sus scrofa]
ADAM10	ADA10_PIG	disintegrin and metalloproteinase domain-containing protein 10 precursor [Sus scrofa]
UMOD	F1RPA9_PIG	PREDICTED: uromodulin [Sus scrofa]
PLA2G1B	PA21B_PIG	RecName: Full=Phospholipase A2, major isoenzyme; AltName: Full=Group IB phospholipase A2; AltName: Full=Phosphatidylcholine 2-acylhydrolase 1B; Flags: Precursor
PNLIPRP2	F1S4T6_PIG	pancreatic lipase-related protein 2 precursor [Sus scrofa]
PNLIP	F1S4T9_PIG	pancreatic triacylglycerol lipase precursor [Sus scrofa]
MUC6	I3LQZ3_PIG	PREDICTED: LOW QUALITY PROTEIN: mucin-6 [Sus scrofa]
COL5A3	F1S3G7_PIG	collagen alpha-3(V) chain precursor [Sus scrofa]
PRELP	F1S6B4_PIG	PREDICTED: prolargin [Sus scrofa]
CAV1	CAV1_PIG	RecName: Full=Caveolin-1
PLPP3	A0A287BJK5_PIG	PREDICTED: lipid phosphate phosphohydrolase 3 isoform X1 [Sus scrofa]
ITGB4	K7GP66_PIG	PREDICTED: integrin beta-4 isoform X3 [Sus scrofa]
MPZ	F1S1B2_PIG	PREDICTED: myelin protein P0 [Sus scrofa]
ITGA1	F1SMF6_PIG	PREDICTED: integrin alpha-1 [Sus scrofa]
ENPP6	F1RSZ8_PIG	PREDICTED: ectonucleotide pyrophosphatase/phosphodiesterase family member 6 [Sus scrofa]
LRP1	K7GS03_PIG	PREDICTED: LOW QUALITY PROTEIN: prolow-density lipoprotein receptor-related protein 1, partial [Sus scrofa]
B2M	B2MG_PIG	RecName: Full=Beta-2-microglobulin; AltName: Full=Lactollin; Flags: Precursor
NID2	A0A287ALN1_PIG	PREDICTED: nidogen-2 isoform X1 [Sus scrofa]
ITGA5	F1SR53_PIG	PREDICTED: integrin alpha-5 [Sus scrofa]
ITGA2	F1SMF4_PIG	integrin alpha-2 precursor [Sus scrofa]
CD46	A0A024CBD6_PIG	CD46 complement regulatory protein [Sus scrofa]
COL2A1	I3LSV6_PIG	PREDICTED: LOW QUALITY PROTEIN: collagen alpha-1(II) chain [Sus scrofa]
TNC	TENA_PIG	RecName: Full=Tenascin; Short=TN; AltName: Full=Cytotactin; AltName: Full=GMEM; AltName: Full=GP 150-225; AltName: Full=Glioma-associated-extracellular matrix antigen; AltName: Full=Hexabrachion; AltName: Full=JI; AltName: Full=Myotendinous antigen; AltName: Full=Neuronectin; AltName: Full=P230; AltName: Full=Tenascin-C; Short=TN-C; Flags: Precursor
LOC396684	F1SCC7_PIG	PREDICTED: serpin A3-5 [Sus scrofa]
NID1	F1RGY5_PIG	PREDICTED: LOW QUALITY PROTEIN: nidogen-1-like [Sus scrofa]
VWF	K7GNN0_PIG	von Willebrand factor precursor [Sus scrofa]
EPX	F1RSB4_PIG	PREDICTED: eosinophil peroxidase [Sus scrofa]

## Sheet: Female-2
Gene symbol	UniProtKB entry name	Description
COL1A1	Q1HNM7_PIG	PREDICTED: collagen alpha-1(I) chain [Sus scrofa]
COL1A2	I3L781_PIG	collagen alpha-2(I) chain precursor [Sus scrofa]
CHIA	I3LL32_PIG	chitinase, acidic precursor [Sus scrofa]
COL1A1	A0A287A1S6_PIG	PREDICTED: collagen alpha-1(I) chain [Sus scrofa]
COL6A3	I3LUR7_PIG	PREDICTED: collagen alpha-3(VI) chain isoform X1 [Sus scrofa]
FBN1	FBN1_PIG	RecName: Full=Fibrillin-1; Contains: RecName: Full=Asprosin; Flags: Precursor
GP2	F1RPA7_PIG	PREDICTED: pancreatic secretory granule membrane major glycoprotein GP2 isoform X1 [Sus scrofa]
CLPS	COL_PIG	RecName: Full=Colipase; AltName: Full=Procolipase II; Flags: Precursor
HSPG2	F1SU03_PIG	PREDICTED: basement membrane-specific heparan sulfate proteoglycan core protein [Sus scrofa]
COL3A1	F1RYI8_PIG	collagen alpha-1(III) chain precursor [Sus scrofa]
SLA-DQB	Q8MGP9_PIG	MHC class II antigen [Sus scrofa]
PNLIP	F1S4T9_PIG	pancreatic triacylglycerol lipase precursor [Sus scrofa]
COL5A2	A0A287BF88_PIG	collagen alpha-2(V) chain precursor [Sus scrofa]
LAMC1	F1S663_PIG	laminin subunit gamma-1 precursor [Sus scrofa]
ITGB1	K7GS94_PIG	PREDICTED: integrin beta-1 isoform X1 [Sus scrofa]
SLA-DQB	Q8SPA1_PIG	MHC class II antigen [Sus scrofa]
PGC	A0A286ZP41_PIG	PREDICTED: gastricsin isoform X1 [Sus scrofa]
COL6A2	I3LQ84_PIG	PREDICTED: collagen alpha-2(VI) chain [Sus scrofa]
SLA-DQB	Q8SPC4_PIG	MHC class II antigen [Sus scrofa]
LAMB1	F1SAE9_PIG	PREDICTED: laminin subunit beta-1 [Sus scrofa]
SLA-DRB	Q8MGQ2_PIG	MHC class II antigen [Sus scrofa]
SLA-DR-alpha	Q31064_PIG	MHC class II DR-alpha, partial [Sus scrofa]
SLA-DRB	Q860P3_PIG	MHC class II antigen [Sus scrofa]
PLA2G1B	PA21B_PIG	RecName: Full=Phospholipase A2, major isoenzyme; AltName: Full=Group IB phospholipase A2; AltName: Full=Phosphatidylcholine 2-acylhydrolase 1B; Flags: Precursor
COL2A1	A0A286ZWS8_PIG	PREDICTED: collagen alpha-1(II) chain-like, partial [Sus scrofa]
STOM_tv1	K9J6J2_PIG	PREDICTED: erythrocyte band 7 integral membrane protein [Sus scrofa]
CD59	CD59_PIG	RecName: Full=CD59 glycoprotein; AltName: Full=MAC-inhibitory protein; Short=MAC-IP; AltName: Full=Membrane attack complex inhibition factor; Short=MACIF; AltName: Full=Protectin; AltName: CD_antigen=CD59; Flags: Precursor
LAMP1	F1RN44_PIG	lysosome-associated membrane glycoprotein 1 precursor [Sus scrofa]
SLA-DQA	A0A172Q3W6_PIG	MHC class II antigen [Sus scrofa]
SLA-DQA	A0A172Q3Y5_PIG	MHC class II antigen [Sus scrofa]
GRN	F1RQZ0_PIG	granulins precursor [Sus scrofa]
CD90	B9ZSM8_PIG	PREDICTED: thy-1 membrane glycoprotein isoform X1 [Sus scrofa]
TINAGL1	F1SVA2_PIG	PREDICTED: tubulointerstitial nephritis antigen-like isoform X1 [Sus scrofa]
COL4A2	F1RLL9_PIG	PREDICTED: collagen alpha-2(IV) chain [Sus scrofa]
TNC	TENA_PIG	RecName: Full=Tenascin; Short=TN; AltName: Full=Cytotactin; AltName: Full=GMEM; AltName: Full=GP 150-225; AltName: Full=Glioma-associated-extracellular matrix antigen; AltName: Full=Hexabrachion; AltName: Full=JI; AltName: Full=Myotendinous antigen; AltName: Full=Neuronectin; AltName: Full=P230; AltName: Full=Tenascin-C; Short=TN-C; Flags: Precursor
COL27A1	F1SN69_PIG	PREDICTED: collagen alpha-1(XXVII) chain [Sus scrofa]
COL4A1	M3V819_PIG	PREDICTED: collagen alpha-1(IV) chain [Sus scrofa]
Jup	PLAK_PIG	RecName: Full=Junction plakoglobin
SLA-B	Q8MHU4_PIG	MHC class I antigen [Sus scrofa]
ADAM10	ADA10_PIG	disintegrin and metalloproteinase domain-containing protein 10 precursor [Sus scrofa]
FBN2	F1RKK1_PIG	PREDICTED: fibrillin-2, partial [Sus scrofa]
COL6A6	A0A287A0A6_PIG	PREDICTED: collagen alpha-6(VI) chain [Sus scrofa]
PNLIPRP2	F1S4T6_PIG	pancreatic lipase-related protein 2 precursor [Sus scrofa]
MUC6	I3LQZ3_PIG	PREDICTED: LOW QUALITY PROTEIN: mucin-6 [Sus scrofa]
COL5A3	F1S3G7_PIG	collagen alpha-3(V) chain precursor [Sus scrofa]
COL5A1	Q59IP3_PIG	collagen alpha-1(V) chain precursor [Sus scrofa]
CAV2	G8GCE6_PIG	caveolin-2 [Sus scrofa]
CD81	A7WLI1_PIG	CD81 [Sus scrofa]
BGN	F1S2B6_PIG	PREDICTED: biglycan isoform X1 [Sus scrofa]
EPX	F1RSB4_PIG	PREDICTED: eosinophil peroxidase [Sus scrofa]

## Sheet: Female-3
Gene symbol	UniProtKB entry name	Description
COL1A1	Q1HNM7_PIG	PREDICTED: collagen alpha-1(I) chain [Sus scrofa]
COL1A2	I3L781_PIG	collagen alpha-2(I) chain precursor [Sus scrofa]
COL1A1	A0A287A1S6_PIG	PREDICTED: collagen alpha-1(I) chain [Sus scrofa]
COL1A2	F1SFA7_PIG	PREDICTED: collagen alpha-2(I) chain-like [Sus scrofa]
CHIA	I3LL32_PIG	chitinase, acidic precursor [Sus scrofa]
COL6A3	I3LUR7_PIG	PREDICTED: collagen alpha-3(VI) chain isoform X1 [Sus scrofa]
FBN1	FBN1_PIG	RecName: Full=Fibrillin-1; Contains: RecName: Full=Asprosin; Flags: Precursor
CLPS	COL_PIG	RecName: Full=Colipase; AltName: Full=Procolipase II; Flags: Precursor
COL3A1	F1RYI8_PIG	collagen alpha-1(III) chain precursor [Sus scrofa]
HSPG2	F1SU03_PIG	PREDICTED: basement membrane-specific heparan sulfate proteoglycan core protein [Sus scrofa]
COL5A2	A0A287BF88_PIG	collagen alpha-2(V) chain precursor [Sus scrofa]
ITGB1	K7GS94_PIG	PREDICTED: integrin beta-1 isoform X1 [Sus scrofa]
SLA-DRB	Q860P3_PIG	MHC class II antigen [Sus scrofa]
PGC	A0A286ZP41_PIG	PREDICTED: gastricsin isoform X1 [Sus scrofa]
STOM_tv1	K9J6J2_PIG	PREDICTED: erythrocyte band 7 integral membrane protein [Sus scrofa]
COL6A2	I3LQ84_PIG	PREDICTED: collagen alpha-2(VI) chain [Sus scrofa]
LAMC1	F1S663_PIG	laminin subunit gamma-1 precursor [Sus scrofa]
COL2A1	I3LSV6_PIG	PREDICTED: LOW QUALITY PROTEIN: collagen alpha-1(II) chain [Sus scrofa]
SLA-DQB	Q8SPC4_PIG	MHC class II antigen [Sus scrofa]
GP2	F1RPA7_PIG	PREDICTED: pancreatic secretory granule membrane major glycoprotein GP2 isoform X1 [Sus scrofa]
PNLIP	F1S4T9_PIG	pancreatic triacylglycerol lipase precursor [Sus scrofa]
LAMB1	F1SAE9_PIG	PREDICTED: laminin subunit beta-1 [Sus scrofa]
SLA-DR-alpha	Q31064_PIG	MHC class II DR-alpha, partial [Sus scrofa]
SLA-DQA	A0A172Q3W6_PIG	MHC class II antigen [Sus scrofa]
MUC6	I3LQZ3_PIG	PREDICTED: LOW QUALITY PROTEIN: mucin-6 [Sus scrofa]
COL27A1	F1SN69_PIG	PREDICTED: collagen alpha-1(XXVII) chain [Sus scrofa]
LOC100153899	F1SCD0_PIG	PREDICTED: serpin A3-8 [Sus scrofa]
COL5A1	Q59IP3_PIG	collagen alpha-1(V) chain precursor [Sus scrofa]
LRP1	K7GS03_PIG	PREDICTED: LOW QUALITY PROTEIN: prolow-density lipoprotein receptor-related protein 1, partial [Sus scrofa]
SLA-1	B1PJU8_PIG	MHC class I antigen [Sus scrofa]
CD59	CD59_PIG	RecName: Full=CD59 glycoprotein; AltName: Full=MAC-inhibitory protein; Short=MAC-IP; AltName: Full=Membrane attack complex inhibition factor; Short=MACIF; AltName: Full=Protectin; AltName: CD_antigen=CD59; Flags: Precursor
SLA-1	A0A0A7BZF2_PIG	MHC class I antigen [Sus scrofa]
LOC100153899	A0A287AVA9_PIG	PREDICTED: serpin A3-8 [Sus scrofa]
NID1	F1RGY5_PIG	PREDICTED: LOW QUALITY PROTEIN: nidogen-1-like [Sus scrofa]
FBN2	F1RKK1_PIG	PREDICTED: fibrillin-2, partial [Sus scrofa]
CAV2	G8GCE6_PIG	caveolin-2 [Sus scrofa]
ADAM10	ADA10_PIG	disintegrin and metalloproteinase domain-containing protein 10 precursor [Sus scrofa]
NUMA1	F1SUX4_PIG	PREDICTED: nuclear mitotic apparatus protein 1 isoform X1 [Sus scrofa]
GRN	F1RQZ0_PIG	granulins precursor [Sus scrofa]
PLA2G1B	PA21B_PIG	RecName: Full=Phospholipase A2, major isoenzyme; AltName: Full=Group IB phospholipase A2; AltName: Full=Phosphatidylcholine 2-acylhydrolase 1B; Flags: Precursor
TNC	TENA_PIG	RecName: Full=Tenascin; Short=TN; AltName: Full=Cytotactin; AltName: Full=GMEM; AltName: Full=GP 150-225; AltName: Full=Glioma-associated-extracellular matrix antigen; AltName: Full=Hexabrachion; AltName: Full=JI; AltName: Full=Myotendinous antigen; AltName: Full=Neuronectin; AltName: Full=P230; AltName: Full=Tenascin-C; Short=TN-C; Flags: Precursor
HMCN2	F1S0Y1_PIG	PREDICTED: hemicentin-2, partial [Sus scrofa]
CRELD2	F1RXR2_PIG	PREDICTED: cysteine-rich with EGF-like domain protein 2 [Sus scrofa]
TINAGL1	F1SVA2_PIG	PREDICTED: tubulointerstitial nephritis antigen-like isoform X1 [Sus scrofa]
COL4A2	F1RLL9_PIG	PREDICTED: collagen alpha-2(IV) chain [Sus scrofa]
COL4A1	M3V819_PIG	PREDICTED: collagen alpha-1(IV) chain [Sus scrofa]
