# Supplementary material for: Proteomic and Bioinformatic Analysis of Decellularized Pancreatic Extracellular Matrices
Source: Molecules. 2021 Nov 8;26(21):6740. doi: 10.3390/molecules26216740 (PMC8588251; doi:10.3390/molecules26216740)
Supplement: Supplementary file 1 [file molecules-26-06740-s001.zip › Supplemental Table S3 dpECM proteins-young using detergent-free method.xlsx]

## Sheet: Young-1
Gene symbol	UniProtKB entry name	Description
COL1A1	Q1HNM7_PIG	PREDICTED: collagen alpha-1(I) chain [Sus scrofa]
FBN1	FBN1_PIG	RecName: Full=Fibrillin-1; Contains: RecName: Full=Asprosin; Flags: Precursor
COL1A2	I3L781_PIG	collagen alpha-2(I) chain precursor [Sus scrofa]
COL6A3	I3LUR7_PIG	PREDICTED: collagen alpha-3(VI) chain isoform X1 [Sus scrofa]
COL1A1	A0A287A1S6_PIG	PREDICTED: collagen alpha-1(I) chain [Sus scrofa]
COL1A2	F1SFA7_PIG	PREDICTED: collagen alpha-2(I) chain-like [Sus scrofa]
SLA-DQB	Q8SPA1_PIG	MHC class II antigen [Sus scrofa]
COL6A2	I3LQ84_PIG	PREDICTED: collagen alpha-2(VI) chain [Sus scrofa]
CHIA	I3LL32_PIG	chitinase, acidic precursor [Sus scrofa]
HSPG2	F1SU03_PIG	PREDICTED: basement membrane-specific heparan sulfate proteoglycan core protein [Sus scrofa]
LAMC1	F1S663_PIG	laminin subunit gamma-1 precursor [Sus scrofa]
COL3A1	F1RYI8_PIG	collagen alpha-1(III) chain precursor [Sus scrofa]
SLA-DQA	A0A172Q3W6_PIG	MHC class II antigen [Sus scrofa]
SLA-DRB1	A7XP04_PIG	MHC class II antigen [Sus scrofa]
VDAC1	VDAC1_PIG	RecName: Full=Voltage-dependent anion-selective channel protein 1; Short=VDAC-1
LAMB1	F1SAE9_PIG	PREDICTED: laminin subunit beta-1 [Sus scrofa]
COL4A1	M3V819_PIG	PREDICTED: collagen alpha-1(IV) chain [Sus scrofa]
ELN	A0A287AXU0_PIG	PREDICTED: elastin-like [Sus scrofa]
COL4A2	F1RLL9_PIG	PREDICTED: collagen alpha-2(IV) chain [Sus scrofa]
ITGB1	K7GS94_PIG	PREDICTED: integrin beta-1 isoform X1 [Sus scrofa]
LAMB2	F1SPT5_PIG	PREDICTED: LOW QUALITY PROTEIN: laminin subunit beta-2 [Sus scrofa]
FBN2	F1RKK1_PIG	PREDICTED: fibrillin-2, partial [Sus scrofa]
DPP4	DPP4_PIG	RecName: Full=Dipeptidyl peptidase 4; AltName: Full=Dipeptidyl peptidase IV; Short=DPP IV; AltName: Full=T-cell activation antigen CD26; AltName: CD_antigen=CD26; Contains: RecName: Full=Dipeptidyl peptidase 4 membrane form; AltName: Full=Dipeptidyl peptidase IV membrane form; Contains: RecName: Full=Dipeptidyl peptidase 4 soluble form; AltName: Full=Dipeptidyl peptidase IV soluble form
PHB2	I3LQN4_PIG	prohibitin-2 [Sus scrofa]
COL6A1	Q1T7A9_PIG	type VI collagen alpha-1 chain, partial [Sus scrofa]
LAMA4	F1RZM4_PIG	PREDICTED: LOW QUALITY PROTEIN: laminin subunit alpha-4 [Sus scrofa]
COL5A2	A0A287BF88_PIG	collagen alpha-2(V) chain precursor [Sus scrofa]
COL2A1	I3LSV6_PIG	PREDICTED: LOW QUALITY PROTEIN: collagen alpha-1(II) chain [Sus scrofa]
ATP5F1A	ATPA_PIG	RecName: Full=ATP synthase subunit alpha, mitochondrial; AltName: Full=ATP synthase subunit alpha heart isoform, mitochondrial; AltName: Full=ATP synthase subunit alpha liver isoform, mitochondrial; Flags: Precursor
ACTB	ACTB_PIG	cytoskeletal beta actin, partial [Sus scrofa]
SLA-DR-alpha	Q31064_PIG	MHC class II DR-alpha, partial [Sus scrofa]
SLA-2	A0A0A7C0G6_PIG	MHC class I antigen [Sus scrofa]
SLA-1	Q8HX68_PIG	MHC class I antigen [Sus scrofa]
PHB	F2Z543_PIG	PREDICTED: prohibitin [Sus scrofa]
STOM_tv1	K9J6J2_PIG	PREDICTED: erythrocyte band 7 integral membrane protein [Sus scrofa]
SLA-1	L7WHJ6_PIG	MHC class I antigen [Sus scrofa]
SLA-B	Q8SPB3_PIG	MHC class I antigen [Sus scrofa]
TINAGL1	F1SVA2_PIG	PREDICTED: tubulointerstitial nephritis antigen-like isoform X1 [Sus scrofa]
ERLIN2	A0A287BRP6_PIG	PREDICTED: erlin-2 isoform X1 [Sus scrofa]
CAV1	CAV1_PIG	RecName: Full=Caveolin-1
CD81	A7WLI1_PIG	CD81 [Sus scrofa]
LOC100153899	F1SCD0_PIG	PREDICTED: serpin A3-8 [Sus scrofa]
DYSF	F1SLE7_PIG	PREDICTED: dysferlin isoform X1 [Sus scrofa]
MME	F1SJM4_PIG	PREDICTED: neprilysin [Sus scrofa]
CD47	CD47_PIG	RecName: Full=Leukocyte surface antigen CD47; AltName: Full=Integrin-associated protein; Short=IAP; AltName: CD_antigen=CD47; Flags: Precursor
SLA	Q0MRZ9_PIG	MHC class I antigen [Sus scrofa]
DCN	F1SQ10_PIG	PREDICTED: decorin isoform X1 [Sus scrofa]
GP2	F1RPA7_PIG	PREDICTED: pancreatic secretory granule membrane major glycoprotein GP2 isoform X1 [Sus scrofa]
RACK1	RACK1_PIG	RecName: Full=Receptor of activated protein C kinase 1; AltName: Full=Guanine nucleotide-binding protein subunit beta-2-like 1; AltName: Full=Receptor for activated C kinase; AltName: Full=Receptor of activated protein kinase C 1; Contains: RecName: Full=Receptor of activated protein C kinase 1, N-terminally processed
DPEP1	DPEP1_PIG	RecName: Full=Dipeptidase 1; AltName: Full=Microsomal dipeptidase; AltName: Full=Renal dipeptidase; Flags: Precursor
BGN	F1S2B6_PIG	PREDICTED: biglycan isoform X1 [Sus scrofa]
RPS3	RS3_PIG	RecName: Full=40S ribosomal protein S3
LAMP1	F1RN44_PIG	lysosome-associated membrane glycoprotein 1 precursor [Sus scrofa]
MUC6	I3LQZ3_PIG	PREDICTED: LOW QUALITY PROTEIN: mucin-6 [Sus scrofa]
COL5A1	Q59IP3_PIG	collagen alpha-1(V) chain precursor [Sus scrofa]
CD90	B9ZSM8_PIG	PREDICTED: thy-1 membrane glycoprotein isoform X1 [Sus scrofa]
VAMP5	A0A287AUN4_PIG	PREDICTED: vesicle-associated membrane protein 5-like [Sus scrofa]
AGRN	I3LGD9_PIG	PREDICTED: LOW QUALITY PROTEIN: agrin [Sus scrofa]
NID2	A0A287ALN1_PIG	PREDICTED: nidogen-2 isoform X1 [Sus scrofa]
TMED10	A0A286ZV95_PIG	PREDICTED: transmembrane emp24 domain-containing protein 10 [Sus scrofa]
CD59	CD59_PIG	RecName: Full=CD59 glycoprotein; AltName: Full=MAC-inhibitory protein; Short=MAC-IP; AltName: Full=Membrane attack complex inhibition factor; Short=MACIF; AltName: Full=Protectin; AltName: CD_antigen=CD59; Flags: Precursor
CAV2	G8GCE6_PIG	caveolin-2 [Sus scrofa]
ARF4	Q56P20_PIG	ADP-ribosylation factor 4 [Sus scrofa]
GNAI1	F1SB90_PIG	guanine nucleotide-binding protein G(i) subunit alpha-1 [Sus scrofa]
LMAN2	F1S3D5_PIG	PREDICTED: vesicular integral-membrane protein VIP36 isoform X1 [Sus scrofa]
COL12A1	F1RQI0_PIG	PREDICTED: collagen alpha-1(XII) chain isoform X1 [Sus scrofa]
LOC396684	F1SCC7_PIG	PREDICTED: serpin A3-5 [Sus scrofa]
SERPINA3-2	Q9GMA6_PIG	alpha-1-antichymotrypsin 2 precursor [Sus scrofa]
ITGB4	K7GP66_PIG	PREDICTED: integrin beta-4 isoform X3 [Sus scrofa]
PTPRC	A0A287A9D0_PIG	PREDICTED: receptor-type tyrosine-protein phosphatase C isoform X1 [Sus scrofa]
PLPP3	A0A287BJK5_PIG	PREDICTED: lipid phosphate phosphohydrolase 3 isoform X1 [Sus scrofa]
ASPN	F1SUE4_PIG	asporin precursor [Sus scrofa]
ITGB2	A8DSD5_PIG	integrin beta-2 precursor [Sus scrofa]
ENPP6	F1RSZ8_PIG	PREDICTED: ectonucleotide pyrophosphatase/phosphodiesterase family member 6 [Sus scrofa]
CLDN4	C3VML0_PIG	PREDICTED: claudin-4 isoform X1 [Sus scrofa]
PLGRKT	A0A286ZI26_PIG	PREDICTED: plasminogen receptor (KT) isoform X1 [Sus scrofa]
ITGA2	F1SMF4_PIG	integrin alpha-2 precursor [Sus scrofa]
ENPEP	AMPE_PIG	RecName: Full=Glutamyl aminopeptidase; Short=EAP; AltName: Full=Aminopeptidase A; Short=AP-A; AltName: CD_antigen=CD249
RAP1A	F2Z5K3_PIG	PREDICTED: ras-related protein Rap-1A isoform X1 [Sus scrofa]
ITGAV	A4USB0_PIG	integrin alpha V [Sus scrofa]
ATP2B3	K7GRJ7_PIG	PREDICTED: plasma membrane calcium-transporting ATPase 3 isoform X1 [Sus scrofa]
MPZ	F1S1B2_PIG	PREDICTED: myelin protein P0 [Sus scrofa]
SLC4A4	S4A4_PIG	RecName: Full=Electrogenic sodium bicarbonate cotransporter 1; Short=Sodium bicarbonate cotransporter; AltName: Full=Na(+)/HCO3(-) cotransporter; AltName: Full=Solute carrier family 4 member 4
MYO10	F1SRM1_PIG	PREDICTED: myosin-10 isoform X1 [Sus scrofa]
LRRC4	F1SML5_PIG	PREDICTED: leucine-rich repeat-containing protein 4 [Sus scrofa]
HSD17B12	I3LJY8_PIG	PREDICTED: very-long-chain 3-oxoacyl-CoA reductase [Sus scrofa]
FGA	F1RX36_PIG	PREDICTED: fibrinogen alpha chain [Sus scrofa]
EPX	F1RSB4_PIG	PREDICTED: eosinophil peroxidase [Sus scrofa]
LAMA3	F1SBB3_PIG	PREDICTED: laminin subunit alpha-3 [Sus scrofa]
DNAJB11	F1SFJ8_PIG	dnaJ homolog subfamily B member 11 precursor [Sus scrofa]
COL21A1	D5KRL1_PIG	PREDICTED: collagen alpha-1(XXI) chain [Sus scrofa]
PRELP	F1S6B4_PIG	PREDICTED: prolargin [Sus scrofa]
AQP1	AQP1_PIG	RecName: Full=Aquaporin-1; Short=AQP-1; AltName: Full=Aquaporin-CHIP; AltName: Full=Water channel protein for red blood cells and kidney proximal tubule
TGM2	F1SDX6_PIG	PREDICTED: protein-glutamine gamma-glutamyltransferase 2 [Sus scrofa]
ENG	EGLN_PIG	RecName: Full=Endoglin; AltName: CD_antigen=CD105; Flags: Precursor
ADAM10	ADA10_PIG	disintegrin and metalloproteinase domain-containing protein 10 precursor [Sus scrofa]
CNTN1	F1SHN1_PIG	PREDICTED: contactin-1 isoform X1 [Sus scrofa]
ATP8B1	F1SM35_PIG	PREDICTED: phospholipid-transporting ATPase IC [Sus scrofa]
WLS	F1S829_PIG	PREDICTED: protein wntless homolog [Sus scrofa]
AMOT	F1RWT7_PIG	PREDICTED: angiomotin isoform X1 [Sus scrofa]
ITPR3	F1RZR0_PIG	PREDICTED: inositol 1,4,5-trisphosphate receptor type 3 isoform X1 [Sus scrofa]
HSPB1	A0A2C9F366_PIG	PREDICTED: heat shock protein beta-1 [Sus scrofa]
STX4	F1RIR2_PIG	PREDICTED: syntaxin-4 [Sus scrofa]
ATP6V0A1	F1S1D6_PIG	PREDICTED: V-type proton ATPase 116 kDa subunit a isoform 1 isoform X1 [Sus scrofa]
CD151	F1RYZ1_PIG	PREDICTED: CD151 antigen isoform X1 [Sus scrofa]
FLOT1	FLOT1_PIG	RecName: Full=Flotillin-1
FLOT2	F1RNA6_PIG	PREDICTED: flotillin-2, partial [Sus scrofa]
ATP1B1	AT1B1_PIG	RecName: Full=Sodium/potassium-transporting ATPase subunit beta-1; AltName: Full=Sodium/potassium-dependent ATPase subunit beta-1
NCSTN	A0A286ZSI3_PIG	PREDICTED: nicastrin isoform X2 [Sus scrofa]
ITM2B	F1RK12_PIG	PREDICTED: integral membrane protein 2B isoform X1 [Sus scrofa]
CA4	F1S1C3_PIG	carbonic anhydrase 4 precursor [Sus scrofa]
SLC1A5	F1RM08_PIG	PREDICTED: neutral amino acid transporter B(0)-like [Sus scrofa]
ATP9A	A5GFS1_PIG	probable phospholipid-transporting ATPase IIA [Sus scrofa]
LRP1	K7GS03_PIG	PREDICTED: LOW QUALITY PROTEIN: prolow-density lipoprotein receptor-related protein 1, partial [Sus scrofa]
KIAA1324	F1S5Z2_PIG	PREDICTED: UPF0577 protein KIAA1324 homolog isoform X1 [Sus scrofa]
FGB	F1RX37_PIG	fibrinogen beta chain precursor [Sus scrofa]
MGST2	A0A0K1TQQ0_PIG	PREDICTED: microsomal glutathione S-transferase 2 [Sus scrofa]
SCARB1	SCRB1_PIG	RecName: Full=Scavenger receptor class B member 1; Short=SRB1; AltName: Full=High density lipoprotein receptor SR-BI; AltName: Full=SR-BI
SACM1L	I3LJB6_PIG	PREDICTED: phosphatidylinositide phosphatase SAC1 isoform X1 [Sus scrofa]
ITGAL	A8DNU5_PIG	integrin alpha-L precursor [Sus scrofa]
L1CAM	K7GN08_PIG	PREDICTED: neural cell adhesion molecule L1 isoform X6 [Sus scrofa]
TSPAN14	F1SEQ6_PIG	PREDICTED: tetraspanin-14 [Sus scrofa]
ATP6V0D1	F2Z5H6_PIG	PREDICTED: V-type proton ATPase subunit d 1 [Sus scrofa]
SNAP23	A0A287AHK8_PIG	PREDICTED: synaptosomal-associated protein 23 isoform X1 [Sus scrofa]
COL6A6	A0A287A0A6_PIG	PREDICTED: collagen alpha-6(VI) chain [Sus scrofa]
GCG	GLUC_PIG	RecName: Full=Glucagon; Contains: RecName: Full=Glicentin; Contains: RecName: Full=Glicentin-related polypeptide; Short=GRPP; Contains: RecName: Full=Oxyntomodulin; Short=OXM; Short=OXY; Contains: RecName: Full=Glucagon; Contains: RecName: Full=Glucagon-like peptide 1; Short=GLP-1; Contains: RecName: Full=Glucagon-like peptide 1(7-37); Short=GLP-1(7-37); Contains: RecName: Full=Glucagon-like pept…
LUM	F1SQ09_PIG	lumican precursor [Sus scrofa]
CPB1	F1SKC7_PIG	PREDICTED: carboxypeptidase B-like [Sus scrofa]
CPA1	CBPA1_PIG	PREDICTED: carboxypeptidase A1 isoform X1 [Sus scrofa]
CPM	I3LTE1_PIG	PREDICTED: carboxypeptidase M [Sus scrofa]
EFEMP1	F8SIP2_PIG	EGF-containing fibulin-like extracellular matrix protein 1 precursor [Sus scrofa]
COL6A1	Q1T7A8_PIG	type VI collagen alpha-1 chain, partial [Sus scrofa]

## Sheet: Young-2
Gene symbol	UniProtKB entry name	Description
FBN1	FBN1_PIG	RecName: Full=Fibrillin-1; Contains: RecName: Full=Asprosin; Flags: Precursor
COL6A3	I3LUR7_PIG	PREDICTED: collagen alpha-3(VI) chain isoform X1 [Sus scrofa]
COL1A1	Q1HNM7_PIG	PREDICTED: collagen alpha-1(I) chain [Sus scrofa]
COL1A2	I3L781_PIG	collagen alpha-2(I) chain precursor [Sus scrofa]
COL1A1	A0A287A1S6_PIG	PREDICTED: collagen alpha-1(I) chain [Sus scrofa]
FBN2	F1RKK1_PIG	PREDICTED: fibrillin-2, partial [Sus scrofa]
CHIA	I3LL32_PIG	chitinase, acidic precursor [Sus scrofa]
HSPG2	F1SU03_PIG	PREDICTED: basement membrane-specific heparan sulfate proteoglycan core protein [Sus scrofa]
SLA-DQB	Q8SPA1_PIG	MHC class II antigen [Sus scrofa]
SLA-DQB	Q8MGP9_PIG	MHC class II antigen [Sus scrofa]
SLA-DQB1	A0A0A7BZH1_PIG	MHC class II antigen [Sus scrofa]
VDAC1	VDAC1_PIG	RecName: Full=Voltage-dependent anion-selective channel protein 1; Short=VDAC-1
SLA-DRB1	A7XP04_PIG	MHC class II antigen [Sus scrofa]
LAMC1	F1S663_PIG	laminin subunit gamma-1 precursor [Sus scrofa]
SLA-DQA	A0A172Q3W6_PIG	MHC class II antigen [Sus scrofa]
SLA-DQA	Q4ZJG0_PIG	MHC class II antigen [Sus scrofa]
SLA-DR-alpha	Q31064_PIG	MHC class II DR-alpha, partial [Sus scrofa]
COL3A1	F1RYI8_PIG	collagen alpha-1(III) chain precursor [Sus scrofa]
PGC	A0A286ZP41_PIG	PREDICTED: gastricsin isoform X1 [Sus scrofa]
ITGB1	K7GS94_PIG	PREDICTED: integrin beta-1 isoform X1 [Sus scrofa]
COL6A2	I3LQ84_PIG	PREDICTED: collagen alpha-2(VI) chain [Sus scrofa]
SLA-DRB	Q8MGW9_PIG	MHC class II antigen [Sus scrofa]
COL5A2	A0A287BF88_PIG	collagen alpha-2(V) chain precursor [Sus scrofa]
MYO10	F1SRM1_PIG	PREDICTED: myosin-10 isoform X1 [Sus scrofa]
DPP4	DPP4_PIG	RecName: Full=Dipeptidyl peptidase 4; AltName: Full=Dipeptidyl peptidase IV; Short=DPP IV; AltName: Full=T-cell activation antigen CD26; AltName: CD_antigen=CD26; Contains: RecName: Full=Dipeptidyl peptidase 4 membrane form; AltName: Full=Dipeptidyl peptidase IV membrane form; Contains: RecName: Full=Dipeptidyl peptidase 4 soluble form; AltName: Full=Dipeptidyl peptidase IV soluble form
MME	F1SJM4_PIG	PREDICTED: neprilysin [Sus scrofa]
COL4A2	F1RLL9_PIG	PREDICTED: collagen alpha-2(IV) chain [Sus scrofa]
LAMB2	F1SPT5_PIG	PREDICTED: LOW QUALITY PROTEIN: laminin subunit beta-2 [Sus scrofa]
LAMB1	F1SAE9_PIG	PREDICTED: laminin subunit beta-1 [Sus scrofa]
SLA-1	Q8HX68_PIG	MHC class I antigen [Sus scrofa]
DPEP1	I3L719_PIG	PREDICTED: dipeptidase 1 isoform X1 [Sus scrofa]
SLA-2	A0A0A7C0G6_PIG	MHC class I antigen [Sus scrofa]
TINAGL1	F1SVA2_PIG	PREDICTED: tubulointerstitial nephritis antigen-like isoform X1 [Sus scrofa]
SLA-1	L7WHJ6_PIG	MHC class I antigen [Sus scrofa]
GP2	F1RPA7_PIG	PREDICTED: pancreatic secretory granule membrane major glycoprotein GP2 isoform X1 [Sus scrofa]
COL4A1	M3V819_PIG	PREDICTED: collagen alpha-1(IV) chain [Sus scrofa]
SLA-1	A0A0A7C0G4_PIG	MHC class I antigen [Sus scrofa]
PHB2	I3LQN4_PIG	prohibitin-2 [Sus scrofa]
AGRN	I3LGD9_PIG	PREDICTED: LOW QUALITY PROTEIN: agrin [Sus scrofa]
TMED10	A0A286ZV95_PIG	PREDICTED: transmembrane emp24 domain-containing protein 10 [Sus scrofa]
ERLIN2	A0A287BRP6_PIG	PREDICTED: erlin-2 isoform X1 [Sus scrofa]
GNAI2	Q06AS6_PIG	guanine nucleotide-binding protein G(i) subunit alpha-2 [Sus scrofa]
RPS3	RS3_PIG	RecName: Full=40S ribosomal protein S3
STOM_tv1	K9J6J2_PIG	PREDICTED: erythrocyte band 7 integral membrane protein [Sus scrofa]
NID2	A0A287ALN1_PIG	PREDICTED: nidogen-2 isoform X1 [Sus scrofa]
DYSF	F1SLE7_PIG	PREDICTED: dysferlin isoform X1 [Sus scrofa]
LAMP1	F1RN44_PIG	lysosome-associated membrane glycoprotein 1 precursor [Sus scrofa]
FAP	K7GQN2_PIG	PREDICTED: prolyl endopeptidase FAP [Sus scrofa]
PHB	F2Z543_PIG	PREDICTED: prohibitin [Sus scrofa]
CD47	CD47_PIG	RecName: Full=Leukocyte surface antigen CD47; AltName: Full=Integrin-associated protein; Short=IAP; AltName: CD_antigen=CD47; Flags: Precursor
CD90	B9ZSM8_PIG	PREDICTED: thy-1 membrane glycoprotein isoform X1 [Sus scrofa]
ARF1	C4MXZ1_PIG	PREDICTED: ADP-ribosylation factor 1 isoform X1 [Sus scrofa]
RACK1	RACK1_PIG	RecName: Full=Receptor of activated protein C kinase 1; AltName: Full=Guanine nucleotide-binding protein subunit beta-2-like 1; AltName: Full=Receptor for activated C kinase; AltName: Full=Receptor of activated protein kinase C 1; Contains: RecName: Full=Receptor of activated protein C kinase 1, N-terminally processed
ITGAV	A4USB0_PIG	integrin alpha V [Sus scrofa]
ACTB	ACTB_PIG	cytoskeletal beta actin, partial [Sus scrofa]
ARF4	Q56P20_PIG	ADP-ribosylation factor 4 [Sus scrofa]
SLA-11	B6ICW9_PIG	SLA-11 histocompatibility antigen, class I [Sus scrofa]
LOC100153899	F1SCD0_PIG	PREDICTED: serpin A3-8 [Sus scrofa]
LOC106504545	F1SCC9_PIG	PREDICTED: serpin A3-8-like [Sus scrofa]
EPX	F1RSB4_PIG	PREDICTED: eosinophil peroxidase [Sus scrofa]
ITGA5	F1SR53_PIG	PREDICTED: integrin alpha-5 [Sus scrofa]
ATP5F1A	ATPA_PIG	RecName: Full=ATP synthase subunit alpha, mitochondrial; AltName: Full=ATP synthase subunit alpha heart isoform, mitochondrial; AltName: Full=ATP synthase subunit alpha liver isoform, mitochondrial; Flags: Precursor
CD46	A0A024CBD6_PIG	CD46 complement regulatory protein [Sus scrofa]
TNC	TENA_PIG	RecName: Full=Tenascin; Short=TN; AltName: Full=Cytotactin; AltName: Full=GMEM; AltName: Full=GP 150-225; AltName: Full=Glioma-associated-extracellular matrix antigen; AltName: Full=Hexabrachion; AltName: Full=JI; AltName: Full=Myotendinous antigen; AltName: Full=Neuronectin; AltName: Full=P230; AltName: Full=Tenascin-C; Short=TN-C; Flags: Precursor
NID1	F1RGY5_PIG	PREDICTED: nidogen-1-like [Sus scrofa]
COPA	F1RJX8_PIG	PREDICTED: coatomer subunit alpha isoform X1 [Sus scrofa]
COL12A1	F1RQI0_PIG	PREDICTED: collagen alpha-1(XII) chain isoform X1 [Sus scrofa]
PTGIS	F1SBE5_PIG	PREDICTED: prostacyclin synthase isoform X1 [Sus scrofa]
LAMA4	F1RZM4_PIG	PREDICTED: LOW QUALITY PROTEIN: laminin subunit alpha-4 [Sus scrofa]
FN1	F1SS24_PIG	PREDICTED: fibronectin isoform X1 [Sus scrofa]
ENPEP	AMPE_PIG	RecName: Full=Glutamyl aminopeptidase; Short=EAP; AltName: Full=Aminopeptidase A; Short=AP-A; AltName: CD_antigen=CD249
ITGB2	A8DSD5_PIG	integrin beta-2 precursor [Sus scrofa]
F11R	B2ZI35_PIG	junctional adhesion molecule A precursor [Sus scrofa]
BGN	F1S2B6_PIG	PREDICTED: biglycan isoform X1 [Sus scrofa]
SLA-DQB*G05	Q9TVD7_PIG	SLA-DQ beta1 domain, partial [Sus scrofa]
LAMA3	F1SBB3_PIG	PREDICTED: laminin subunit alpha-3 [Sus scrofa]
COL2A1	A0A286ZWS8_PIG	PREDICTED: collagen alpha-1(II) chain-like, partial [Sus scrofa]
SLC4A4	S4A4_PIG	RecName: Full=Electrogenic sodium bicarbonate cotransporter 1; Short=Sodium bicarbonate cotransporter; AltName: Full=Na(+)/HCO3(-) cotransporter; AltName: Full=Solute carrier family 4 member 4
SCARB2	F1RYT3_PIG	PREDICTED: lysosome membrane protein 2 isoform X1 [Sus scrofa]
SNAP23	A0A287AHK8_PIG	PREDICTED: synaptosomal-associated protein 23 isoform X1 [Sus scrofa]
FGB	F1RX37_PIG	fibrinogen beta chain precursor [Sus scrofa]
CD59	CD59_PIG	RecName: Full=CD59 glycoprotein; AltName: Full=MAC-inhibitory protein; Short=MAC-IP; AltName: Full=Membrane attack complex inhibition factor; Short=MACIF; AltName: Full=Protectin; AltName: CD_antigen=CD59; Flags: Precursor
ATP1B1	AT1B1_PIG	RecName: Full=Sodium/potassium-transporting ATPase subunit beta-1; AltName: Full=Sodium/potassium-dependent ATPase subunit beta-1
RAB10	F2Z5F2_PIG	ras-related protein Rab-10 [Sus scrofa]
SERPINH1	A0A286ZRU9_PIG	serpin H1 precursor [Sus scrofa]
PCSK2	NEC2_PIG	RecName: Full=Neuroendocrine convertase 2; Short=NEC 2; AltName: Full=KEX2-like endoprotease 2; AltName: Full=Prohormone convertase 2; AltName: Full=Proprotein convertase 2; Short=PC2; Flags: Precursor
CPB1	F1SKC7_PIG	PREDICTED: carboxypeptidase B-like [Sus scrofa]
PTPRC	A0A287A9D0_PIG	PREDICTED: receptor-type tyrosine-protein phosphatase C isoform X1 [Sus scrofa]
ASPN	F1SUE4_PIG	asporin precursor [Sus scrofa]
MFSD10	F1S8P6_PIG	PREDICTED: major facilitator superfamily domain-containing protein 10 [Sus scrofa]
STOML2	A0A286ZSD7_PIG	PREDICTED: stomatin-like protein 2, mitochondrial [Sus scrofa]
SACM1L	I3LJB6_PIG	PREDICTED: phosphatidylinositide phosphatase SAC1 isoform X1 [Sus scrofa]
ITGA2	F1SMF4_PIG	integrin alpha-2 precursor [Sus scrofa]
RAP1A	F2Z5K3_PIG	PREDICTED: ras-related protein Rap-1A isoform X1 [Sus scrofa]
XPNPEP2	XPP2_PIG	RecName: Full=Xaa-Pro aminopeptidase 2; AltName: Full=Aminoacylproline aminopeptidase; AltName: Full=Membrane-bound aminopeptidase P; Short=Membrane-bound APP; Short=Membrane-bound AmP; Short=mAmP; AltName: Full=X-Pro aminopeptidase 2; Flags: Precursor
CA4	F1S1C3_PIG	carbonic anhydrase 4 precursor [Sus scrofa]
FOLH1	FOLH1_PIG	RecName: Full=Glutamate carboxypeptidase 2; AltName: Full=Folate hydrolase 1; AltName: Full=Folylpoly-gamma-glutamate carboxypeptidase; Short=FGCP; AltName: Full=Glutamate carboxypeptidase II; Short=GCPII; AltName: Full=Membrane glutamate carboxypeptidase; Short=mGCP; AltName: Full=N-acetylated-alpha-linked acidic dipeptidase I; Short=NAALADase I; AltName: Full=Prostate-specific membrane antigen …
ENPP6	F1RSZ8_PIG	PREDICTED: ectonucleotide pyrophosphatase/phosphodiesterase family member 6 [Sus scrofa]
LMAN2	F1S3D5_PIG	PREDICTED: vesicular integral-membrane protein VIP36 isoform X1 [Sus scrofa]
RAB8B	F1S091_PIG	PREDICTED: ras-related protein Rab-8B [Sus scrofa]
VWF	K7GNN0_PIG	von Willebrand factor precursor [Sus scrofa]
LOC102162895	PRP_PIG	PREDICTED: basic proline-rich protein-like [Sus scrofa]
COL27A1	F1SN69_PIG	PREDICTED: collagen alpha-1(XXVII) chain [Sus scrofa]
FBN3	F1SA65_PIG	PREDICTED: fibrillin-3 [Sus scrofa]
AZU1	CAP7_PIG	RecName: Full=Azurocidin; AltName: Full=Cationic antimicrobial protein CAP37; AltName: Full=Heparin-binding protein; Short=HBP; Short=pHBP; Flags: Precursor
COL4A5	F1RXI2_PIG	PREDICTED: collagen alpha-5(IV) chain [Sus scrofa]
ITGA6	K7GT68_PIG	PREDICTED: integrin alpha-6 [Sus scrofa]
CD44	F1SGT4_PIG	PREDICTED: CD44 antigen isoform X8 [Sus scrofa]
VAMP5	A0A287AUN4_PIG	PREDICTED: vesicle-associated membrane protein 5-like [Sus scrofa]
EMP2	A0A287A649_PIG	PREDICTED: epithelial membrane protein 2 isoform X2 [Sus scrofa]
NCSTN	A0A286ZSI3_PIG	PREDICTED: nicastrin isoform X2 [Sus scrofa]
CD61	Q95JH1_PIG	integrin beta-3 precursor [Sus scrofa]
LRP1	K7GS03_PIG	PREDICTED: LOW QUALITY PROTEIN: prolow-density lipoprotein receptor-related protein 1, partial [Sus scrofa]
IGF2R	F1SB67_PIG	cation-independent mannose-6-phosphate receptor precursor [Sus scrofa]
CD81	A7WLI1_PIG	CD81 [Sus scrofa]
CAV1	CAV1_PIG	RecName: Full=Caveolin-1
NPC1	F1SBB5_PIG	PREDICTED: Niemann-Pick C1 protein isoform X1 [Sus scrofa]
ADGRE5	F1SD42_PIG	CD97 antigen [Sus scrofa]
PLPP1	F1SLL5_PIG	PREDICTED: lipid phosphate phosphohydrolase 1 isoform X1 [Sus scrofa]
SLC38A5	I3LQM7_PIG	PREDICTED: sodium-coupled neutral amino acid transporter 5 isoform X1 [Sus scrofa]
ATP6V0A1	F1S1D6_PIG	PREDICTED: V-type proton ATPase 116 kDa subunit a isoform 1 isoform X1 [Sus scrofa]
RAC2	I3LKU0_PIG	PREDICTED: ras-related C3 botulinum toxin substrate 2 isoform X1 [Sus scrofa]
P4HB	G9F6X8_PIG	prolyl 4-hydroxylase beta polypeptide [Sus scrofa]
HSPB1	A0A2C9F366_PIG	PREDICTED: heat shock protein beta-1 [Sus scrofa]
CYBB	CY24B_PIG	PREDICTED: cytochrome b-245 heavy chain isoform X1 [Sus scrofa]
RHOC	F2Z5K4_PIG	PREDICTED: rho-related GTP-binding protein RhoC [Sus scrofa]
HSP90AA1	HS90A_PIG	RecName: Full=Heat shock protein HSP 90-alpha
SCCPDH	F1S8P1_PIG	saccharopine dehydrogenase-like oxidoreductase [Sus scrofa]
ATP2B1	AT2B1_PIG	RecName: Full=Plasma membrane calcium-transporting ATPase 1; Short=PMCA1; AltName: Full=Plasma membrane calcium pump isoform 1
ITGA1	F1SMF6_PIG	PREDICTED: integrin alpha-1 [Sus scrofa]
HNRNPU	A0A286ZVL0_PIG	PREDICTED: heterogeneous nuclear ribonucleoprotein U [Sus scrofa]
CPA1	CBPA1_PIG	PREDICTED: carboxypeptidase A1 isoform X1 [Sus scrofa]
DNAJB11	F1SFJ8_PIG	dnaJ homolog subfamily B member 11 precursor [Sus scrofa]
CLPS	COL_PIG	RecName: Full=Colipase; AltName: Full=Procolipase II; Flags: Precursor
PCYOX1	I3L9F5_PIG	PREDICTED: prenylcysteine oxidase 1 [Sus scrofa]
COL6A6	A0A287A0A6_PIG	PREDICTED: collagen alpha-6(VI) chain [Sus scrofa]
RETN	Q6QR67_PIG	resistin precursor [Sus scrofa]
DCN	PGS2_PIG	RecName: Full=Decorin; AltName: Full=Bone proteoglycan II; AltName: Full=PG-S2; Flags: Precursor
FGA	F1RX36_PIG	PREDICTED: fibrinogen alpha chain [Sus scrofa]
ENG	EGLN_PIG	RecName: Full=Endoglin; AltName: CD_antigen=CD105; Flags: Precursor
ANO6	A0A287A905_PIG	PREDICTED: anoctamin-6 isoform X1 [Sus scrofa]
ARF6	ARF6_PIG	RecName: Full=ADP-ribosylation factor 6
DSP	F1RW75_PIG	PREDICTED: LOW QUALITY PROTEIN: desmoplakin [Sus scrofa]
ADAM10	ADA10_PIG	disintegrin and metalloproteinase domain-containing protein 10 precursor [Sus scrofa]
TGM2	F1SDX6_PIG	PREDICTED: protein-glutamine gamma-glutamyltransferase 2 [Sus scrofa]
EGFR	A0A286ZV23_PIG	epidermal growth factor receptor precursor [Sus scrofa]
ANO10	F1SRD2_PIG	PREDICTED: anoctamin-10 [Sus scrofa]
APH1A	I3L8R2_PIG	gamma-secretase subunit APH-1A [Sus scrofa]
CLTC	C0MHR2_PIG	clathrin heavy chain 1 [Sus scrofa]
PLGRKT	A0A286ZI26_PIG	PREDICTED: plasminogen receptor (KT) isoform X1 [Sus scrofa]
PECAM1	PECA1_PIG	RecName: Full=Platelet endothelial cell adhesion molecule; Short=PECAM-1; AltName: CD_antigen=CD31; Flags: Precursor
FLOT1	FLOT1_PIG	RecName: Full=Flotillin-1
Jup	PLAK_PIG	RecName: Full=Junction plakoglobin
FLOT2	F1RNA6_PIG	PREDICTED: flotillin-2, partial [Sus scrofa]
CAV2	G8GCE6_PIG	caveolin-2 [Sus scrofa]
VPS35	I3LBB2_PIG	PREDICTED: vacuolar protein sorting-associated protein 35 [Sus scrofa]
SLC1A5	F1RM08_PIG	PREDICTED: neutral amino acid transporter B(0)-like [Sus scrofa]
STX7	F1S3P8_PIG	PREDICTED: syntaxin-7 [Sus scrofa]
SLCO2A1	Q2QEH5_PIG	solute carrier organic anion transporter family member 2A1 [Sus scrofa]
NT5E	K7GSR6_PIG	PREDICTED: 5'-nucleotidase [Sus scrofa]
ATP9A	A5GFS1_PIG	probable phospholipid-transporting ATPase IIA [Sus scrofa]
ATP6V0A2	F1RFL9_PIG	PREDICTED: V-type proton ATPase 116 kDa subunit a isoform 2 [Sus scrofa]
grp-58	E1CAJ5_PIG	protein disulfide-isomerase A3 precursor [Sus scrofa]
RDX	RADI_PIG	RecName: Full=Radixin; AltName: Full=Moesin-B
S100A9	C3S7K6_PIG	RNA-binding region containing protein 2-like [Sus scrofa]
SERPINA3-2	Q9GMA6_PIG	alpha-1-antichymotrypsin 2 precursor [Sus scrofa]
MUC6	I3LQZ3_PIG	PREDICTED: LOW QUALITY PROTEIN: mucin-6 [Sus scrofa]
PNLIPRP2	F1S4T6_PIG	pancreatic lipase-related protein 2 precursor [Sus scrofa]
LOC100153899	A0A287AVA9_PIG	PREDICTED: serpin A3-8 [Sus scrofa]
SERPINA1	A1AT_PIG	RecName: Full=Alpha-1-antitrypsin; AltName: Full=Alpha-1 protease inhibitor; AltName: Full=Alpha-1-antiproteinase; AltName: Full=Serpin A1; Flags: Precursor
EFEMP1	F8SIP2_PIG	EGF-containing fibulin-like extracellular matrix protein 1 precursor [Sus scrofa]
PLPP3	A0A287BJK5_PIG	PREDICTED: lipid phosphate phosphohydrolase 3 isoform X1 [Sus scrofa]
ITGB4	K7GP66_PIG	PREDICTED: integrin beta-4 isoform X3 [Sus scrofa]
WLS	F1S829_PIG	PREDICTED: protein wntless homolog [Sus scrofa]
AQP1	AQP1_PIG	RecName: Full=Aquaporin-1; Short=AQP-1; AltName: Full=Aquaporin-CHIP; AltName: Full=Water channel protein for red blood cells and kidney proximal tubule
ATP8B1	F1SM35_PIG	PREDICTED: phospholipid-transporting ATPase IC [Sus scrofa]
HSPA5	A0A287BIL8_PIG	PREDICTED: 78 kDa glucose-regulated protein [Sus scrofa]
CDC42	CDC42_PIG	cell division control protein 42 homolog [Sus scrofa]
NPNT	A0A287AU52_PIG	PREDICTED: nephronectin [Sus scrofa]
TMEM231	F1S455_PIG	PREDICTED: transmembrane protein 231 isoform X1 [Sus scrofa]
LOX	F1RLC4_PIG	protein-lysine 6-oxidase precursor [Sus scrofa]
COL8A1	F1SKX7_PIG	PREDICTED: collagen alpha-1(VIII) chain isoform X1 [Sus scrofa]
ITGAL	A8DNU5_PIG	integrin alpha-L precursor [Sus scrofa]
CD163	C163A_PIG	RecName: Full=Scavenger receptor cysteine-rich type 1 protein M130; AltName: CD_antigen=CD163; Contains: RecName: Full=Soluble CD163; Short=sCD163; Flags: Precursor
CLDN7	C3VPJ4_PIG	PREDICTED: claudin-7 [Sus scrofa]
L1CAM	K7GN08_PIG	PREDICTED: neural cell adhesion molecule L1 isoform X6 [Sus scrofa]
MGST2	A0A0K1TQQ0_PIG	PREDICTED: microsomal glutathione S-transferase 2 [Sus scrofa]
NSF	A0A287AYL9_PIG	PREDICTED: vesicle-fusing ATPase isoform X1 [Sus scrofa]
GNA11	GNA11_PIG	RecName: Full=Guanine nucleotide-binding protein subunit alpha-11; Short=G alpha-11; Short=G-protein subunit alpha-11
DNAJC1	I3L6W6_PIG	PREDICTED: dnaJ homolog subfamily C member 1 [Sus scrofa]
ARL6IP5	PRAF3_PIG	PRA1 family protein 2 [Sus scrofa]
SMPD2	F1RSY4_PIG	PREDICTED: sphingomyelin phosphodiesterase 2 [Sus scrofa]
TMEM30A	A0A287A5T0_PIG	PREDICTED: cell cycle control protein 50A [Sus scrofa]
SERINC5	F1RF26_PIG	PREDICTED: serine incorporator 5 [Sus scrofa]
RHAG	F1RPZ7_PIG	PREDICTED: ammonium transporter Rh type A [Sus scrofa]
KIAA1324	F1S5Z2_PIG	PREDICTED: UPF0577 protein KIAA1324 homolog isoform X1 [Sus scrofa]
TSPAN9	TSN9_PIG	RecName: Full=Tetraspanin-9; Short=Tspan-9
B2M	B2MG_PIG	RecName: Full=Beta-2-microglobulin; AltName: Full=Lactollin; Flags: Precursor
SPPL2A	F1RYM5_PIG	PREDICTED: signal peptide peptidase-like 2A [Sus scrofa]
CMLKR1	CML1_PIG	RecName: Full=Chemokine-like receptor 1
CDH1	C6EVT4_PIG	cadherin-1 precursor [Sus scrofa]
CD151	F1RYZ1_PIG	PREDICTED: CD151 antigen isoform X1 [Sus scrofa]
SLA-DMB	A5D9L3_PIG	MHC class II, DM beta precursor [Sus scrofa]
TCIRG1	F1RVP8_PIG	PREDICTED: V-type proton ATPase 116 kDa subunit a isoform 3 isoform X1 [Sus scrofa]
ABHD6	F1SGJ4_PIG	PREDICTED: monoacylglycerol lipase ABHD6 [Sus scrofa]
CLDN4	C3VML0_PIG	PREDICTED: claudin-4 isoform X1 [Sus scrofa]
SLC2A1	GTR1_PIG	RecName: Full=Solute carrier family 2, facilitated glucose transporter member 1; AltName: Full=Glucose transporter type 1, erythrocyte/brain; Short=GLUT-1
CFL1	COF1_PIG	RecName: Full=Cofilin-1; AltName: Full=Cofilin, non-muscle isoform
ITGB5	G3FNU5_PIG	integrin beta-5 precursor [Sus scrofa]
ITPR3	F1RZR0_PIG	PREDICTED: inositol 1,4,5-trisphosphate receptor type 3 isoform X1 [Sus scrofa]
LOC100621657	A0A286ZR24_PIG	PREDICTED: olfactory receptor 5H2-like [Sus scrofa]
COPB1	COPB_PIG	RecName: Full=Coatomer subunit beta; AltName: Full=Beta-coat protein; Short=Beta-COP
SCARB1	SCRB1_PIG	RecName: Full=Scavenger receptor class B member 1; Short=SRB1; AltName: Full=High density lipoprotein receptor SR-BI; AltName: Full=SR-BI
BCAP31	F1S2A8_PIG	PREDICTED: B-cell receptor-associated protein 31 [Sus scrofa]
BST1	K7GN83_PIG	PREDICTED: ADP-ribosyl cyclase/cyclic ADP-ribose hydrolase 2 [Sus scrofa]
ADAM22	A0A287BHK8_PIG	PREDICTED: disintegrin and metalloproteinase domain-containing protein 22 isoform X1 [Sus scrofa]
STX2	F1RFQ6_PIG	PREDICTED: syntaxin-2 isoform X1 [Sus scrofa]
GRN	F1RQZ0_PIG	granulins precursor [Sus scrofa]
STX4	F1RIR2_PIG	PREDICTED: syntaxin-4 [Sus scrofa]
ANXA4	ANXA4_PIG	RecName: Full=Annexin A4; AltName: Full=35-beta calcimedin; AltName: Full=Annexin IV; AltName: Full=Annexin-4; AltName: Full=Chromobindin-4; AltName: Full=Endonexin I; AltName: Full=Lipocortin IV; AltName: Full=P32.5; AltName: Full=PP4-X; AltName: Full=Placental anticoagulant protein II; Short=PAP-II; AltName: Full=Protein II
NCAM1	F1SM72_PIG	PREDICTED: neural cell adhesion molecule 1 isoform X1 [Sus scrofa]
CD63	F1SPK8_PIG	PREDICTED: CD63 antigen [Sus scrofa]
PLA2G1B	PA21B_PIG	RecName: Full=Phospholipase A2, major isoenzyme; AltName: Full=Group IB phospholipase A2; AltName: Full=Phosphatidylcholine 2-acylhydrolase 1B; Flags: Precursor
TFF2	I3LMK2_PIG	PREDICTED: trefoil factor 2 [Sus scrofa]
SERPINB1	F2Z5B1_PIG	PREDICTED: leukocyte elastase inhibitor [Sus scrofa]
FBLN5	F1SD87_PIG	PREDICTED: fibulin-5 isoform X1 [Sus scrofa]
LAMP2	F1RUC0_PIG	PREDICTED: lysosome-associated membrane glycoprotein 2 isoform X1 [Sus scrofa]
LOC100517891	F1RJ50_PIG	PREDICTED: serum amyloid P-component [Sus scrofa]
LOC100621421	A0A287A504_PIG	PREDICTED: acidic mammalian chitinase-like [Sus scrofa]
CPM	I3LTE1_PIG	PREDICTED: carboxypeptidase M [Sus scrofa]
LUM	F1SQ09_PIG	lumican precursor [Sus scrofa]
CNP	A0A287BD93_PIG	PREDICTED: 2',3'-cyclic-nucleotide 3'-phosphodiesterase [Sus scrofa]
COL4A5	A0A287A007_PIG	PREDICTED: collagen alpha-6(IV) chain, partial [Sus scrofa]
PRELP	F1S6B4_PIG	PREDICTED: prolargin [Sus scrofa]
COL5A1	Q59IP3_PIG	collagen alpha-1(V) chain precursor [Sus scrofa]

## Sheet: Young-3
Gene symbol	UniProtKB entry name	Description
COL6A3	I3LUR7_PIG	PREDICTED: collagen alpha-3(VI) chain isoform X1 [Sus scrofa]
COL1A1	Q1HNM7_PIG	PREDICTED: collagen alpha-1(I) chain [Sus scrofa]
COL1A2	I3L781_PIG	collagen alpha-2(I) chain precursor [Sus scrofa]
COL6A2	I3LQ84_PIG	PREDICTED: collagen alpha-2(VI) chain [Sus scrofa]
COL1A1	A0A287A1S6_PIG	PREDICTED: collagen alpha-1(I) chain [Sus scrofa]
COL1A2	F1SFA7_PIG	PREDICTED: collagen alpha-2(I) chain-like [Sus scrofa]
FBN1	FBN1_PIG	RecName: Full=Fibrillin-1; Contains: RecName: Full=Asprosin; Flags: Precursor
SLA-DQB	Q8SPA1_PIG	MHC class II antigen [Sus scrofa]
GP2	F1RPA7_PIG	PREDICTED: pancreatic secretory granule membrane major glycoprotein GP2 isoform X1 [Sus scrofa]
HSPG2	F1SU03_PIG	PREDICTED: basement membrane-specific heparan sulfate proteoglycan core protein [Sus scrofa]
CHIA	I3LL32_PIG	chitinase, acidic precursor [Sus scrofa]
COL4A1	M3V819_PIG	PREDICTED: collagen alpha-1(IV) chain [Sus scrofa]
LAMC1	F1S663_PIG	laminin subunit gamma-1 precursor [Sus scrofa]
AMY2	AMYP_PIG	Chain A, Pig Alpha-amylase
COL4A2	F1RLL9_PIG	PREDICTED: collagen alpha-2(IV) chain [Sus scrofa]
SLA-DQA	A0A172Q3W6_PIG	MHC class II antigen [Sus scrofa]
COL6A1	Q1T7A9_PIG	type VI collagen alpha-1 chain, partial [Sus scrofa]
COL3A1	F1RYI8_PIG	collagen alpha-1(III) chain precursor [Sus scrofa]
SLA-DRB1	A7XP04_PIG	MHC class II antigen [Sus scrofa]
TINAGL1	F1SVA2_PIG	PREDICTED: tubulointerstitial nephritis antigen-like isoform X1 [Sus scrofa]
LAMB1	F1SAE9_PIG	PREDICTED: laminin subunit beta-1 [Sus scrofa]
VDAC1	VDAC1_PIG	RecName: Full=Voltage-dependent anion-selective channel protein 1; Short=VDAC-1
SLA-DQA	A0A172Q3Y5_PIG	MHC class II antigen [Sus scrofa]
LAMB2	F1SPT5_PIG	PREDICTED: LOW QUALITY PROTEIN: laminin subunit beta-2 [Sus scrofa]
SLA-DR-alpha	Q31064_PIG	MHC class II DR-alpha, partial [Sus scrofa]
PNLIPRP2	F1S4T6_PIG	pancreatic lipase-related protein 2 precursor [Sus scrofa]
ATP1A1	AT1A1_PIG	RecName: Full=Sodium/potassium-transporting ATPase subunit alpha-1; Short=Na(+)/K(+) ATPase alpha-1 subunit; AltName: Full=Sodium pump subunit alpha-1; Flags: Precursor
STOM_tv1	K9J6J2_PIG	PREDICTED: erythrocyte band 7 integral membrane protein [Sus scrofa]
COL6A1	Q1T7A8_PIG	type VI collagen alpha-1 chain, partial [Sus scrofa]
CLPS	COL_PIG	RecName: Full=Colipase; AltName: Full=Procolipase II; Flags: Precursor
PRELP	F1S6B4_PIG	PREDICTED: prolargin [Sus scrofa]
DPEP1	I3L719_PIG	PREDICTED: dipeptidase 1 isoform X1 [Sus scrofa]
BGN	F1S2B6_PIG	PREDICTED: biglycan isoform X1 [Sus scrofa]
COL4A5	F1RXI2_PIG	PREDICTED: collagen alpha-5(IV) chain [Sus scrofa]
DCN	PGS2_PIG	RecName: Full=Decorin; AltName: Full=Bone proteoglycan II; AltName: Full=PG-S2; Flags: Precursor
ITGB1	K7GS94_PIG	PREDICTED: integrin beta-1 isoform X1 [Sus scrofa]
DPP4	DPP4_PIG	RecName: Full=Dipeptidyl peptidase 4; AltName: Full=Dipeptidyl peptidase IV; Short=DPP IV; AltName: Full=T-cell activation antigen CD26; AltName: CD_antigen=CD26; Contains: RecName: Full=Dipeptidyl peptidase 4 membrane form; AltName: Full=Dipeptidyl peptidase IV membrane form; Contains: RecName: Full=Dipeptidyl peptidase 4 soluble form; AltName: Full=Dipeptidyl peptidase IV soluble form
CAV1	CAV1_PIG	RecName: Full=Caveolin-1
SLA-1	Q8HX68_PIG	MHC class I antigen [Sus scrofa]
SLA-DRB	Q8MGW9_PIG	MHC class II antigen [Sus scrofa]
CA4	F1S1C3_PIG	carbonic anhydrase 4 precursor [Sus scrofa]
CD47	CD47_PIG	RecName: Full=Leukocyte surface antigen CD47; AltName: Full=Integrin-associated protein; Short=IAP; AltName: CD_antigen=CD47; Flags: Precursor
ANPEP	K7GMF9_PIG	PREDICTED: aminopeptidase N isoform X1 [Sus scrofa]
ERLIN2	A0A287BRP6_PIG	PREDICTED: erlin-2 isoform X1 [Sus scrofa]
LAMA4	F1RZM4_PIG	PREDICTED: LOW QUALITY PROTEIN: laminin subunit alpha-4 [Sus scrofa]
PA14	O19240_PIG	MHC class I antigen [Sus scrofa]
PLPP1	F1SLL5_PIG	PREDICTED: lipid phosphate phosphohydrolase 1 isoform X1 [Sus scrofa]
SLA-1	A0A0N9E903_PIG	MHC class I antigen [Sus scrofa]
COL5A2	A0A287BF88_PIG	collagen alpha-2(V) chain precursor [Sus scrofa]
NCSTN	A0A286ZSI3_PIG	PREDICTED: nicastrin isoform X2 [Sus scrofa]
ATP1B1	AT1B1_PIG	RecName: Full=Sodium/potassium-transporting ATPase subunit beta-1; AltName: Full=Sodium/potassium-dependent ATPase subunit beta-1
SLA-1	B1PJV4_PIG	MHC class I antigen [Sus scrofa]
SLA-1	L7WHJ6_PIG	MHC class I antigen [Sus scrofa]
PNLIP	F1S4T9_PIG	pancreatic triacylglycerol lipase precursor [Sus scrofa]
TGFBI	BGH3_PIG	RecName: Full=Transforming growth factor-beta-induced protein ig-h3; Short=Beta ig-h3; AltName: Full=Kerato-epithelin; AltName: Full=RGD-containing collagen-associated protein; Short=RGD-CAP; Flags: Precursor
COL5A1	Q59IP3_PIG	collagen alpha-1(V) chain precursor [Sus scrofa]
DYSF	F1SLE7_PIG	PREDICTED: dysferlin isoform X1 [Sus scrofa]
COL2A1	A0A286ZWS8_PIG	PREDICTED: collagen alpha-1(II) chain-like, partial [Sus scrofa]
NID2	A0A287ALN1_PIG	PREDICTED: nidogen-2 isoform X1 [Sus scrofa]
TMED10	A0A286ZV95_PIG	PREDICTED: transmembrane emp24 domain-containing protein 10 [Sus scrofa]
MYO10	F1SRM1_PIG	PREDICTED: myosin-10 isoform X1 [Sus scrofa]
CPA1	CBPA1_PIG	PREDICTED: carboxypeptidase A1 isoform X1 [Sus scrofa]
LOC100153899	F1SCD0_PIG	PREDICTED: serpin A3-8 [Sus scrofa]
COL4A5	A0A287A007_PIG	PREDICTED: collagen alpha-6(IV) chain, partial [Sus scrofa]
CACNA2D1	A0A287B843_PIG	PREDICTED: voltage-dependent calcium channel subunit alpha-2/delta-1 isoform X1 [Sus scrofa]
CD81	A7WLI1_PIG	CD81 [Sus scrofa]
NID1	F1RGY5_PIG	PREDICTED: nidogen-1-like [Sus scrofa]
LUM	F1SQ09_PIG	lumican precursor [Sus scrofa]
CD90	B9ZSM8_PIG	PREDICTED: thy-1 membrane glycoprotein isoform X1 [Sus scrofa]
ARF5	B9V4F0_PIG	ADP-ribosylation factor 5 [Sus scrofa]
CAV2	CAV2_PIG	RecName: Full=Caveolin-2
CD59	CD59_PIG	RecName: Full=CD59 glycoprotein; AltName: Full=MAC-inhibitory protein; Short=MAC-IP; AltName: Full=Membrane attack complex inhibition factor; Short=MACIF; AltName: Full=Protectin; AltName: CD_antigen=CD59; Flags: Precursor
ITGA2	F1SMF4_PIG	integrin alpha-2 precursor [Sus scrofa]
FOLH1	FOLH1_PIG	RecName: Full=Glutamate carboxypeptidase 2; AltName: Full=Folate hydrolase 1; AltName: Full=Folylpoly-gamma-glutamate carboxypeptidase; Short=FGCP; AltName: Full=Glutamate carboxypeptidase II; Short=GCPII; AltName: Full=Membrane glutamate carboxypeptidase; Short=mGCP; AltName: Full=N-acetylated-alpha-linked acidic dipeptidase I; Short=NAALADase I; AltName: Full=Prostate-specific membrane antigen …
ITGA5	F1SR53_PIG	PREDICTED: integrin alpha-5 [Sus scrofa]
AGRN	I3LGD9_PIG	PREDICTED: LOW QUALITY PROTEIN: agrin [Sus scrofa]
SNAP23	A0A287AHK8_PIG	PREDICTED: synaptosomal-associated protein 23 isoform X1 [Sus scrofa]
SLC38A5	I3LQM7_PIG	PREDICTED: sodium-coupled neutral amino acid transporter 5 isoform X1 [Sus scrofa]
CPB1	F1SKC7_PIG	PREDICTED: carboxypeptidase B-like [Sus scrofa]
COL6A6	A0A287A0A6_PIG	PREDICTED: collagen alpha-6(VI) chain [Sus scrofa]
COL21A1	D5KRL1_PIG	PREDICTED: collagen alpha-1(XXI) chain [Sus scrofa]
PTGIS	F1SBE5_PIG	PREDICTED: prostacyclin synthase isoform X1 [Sus scrofa]
ASPN	F1SUE4_PIG	asporin precursor [Sus scrofa]
SCARB2	F1RYT3_PIG	PREDICTED: lysosome membrane protein 2 isoform X1 [Sus scrofa]
ITGAV	A4USB0_PIG	integrin alpha V [Sus scrofa]
LAMP1	F1RN44_PIG	lysosome-associated membrane glycoprotein 1 precursor [Sus scrofa]
GNAI1	F1SB90_PIG	guanine nucleotide-binding protein G(i) subunit alpha-1 [Sus scrofa]
COL12A1	F1RQI0_PIG	PREDICTED: collagen alpha-1(XII) chain isoform X1 [Sus scrofa]
LOC100517891	F1RJ50_PIG	PREDICTED: serum amyloid P-component [Sus scrofa]
CPM	I3LTE1_PIG	PREDICTED: carboxypeptidase M [Sus scrofa]
PCYOX1	I3L9F5_PIG	PREDICTED: prenylcysteine oxidase 1 [Sus scrofa]
SERPINA3-2	Q9GMA6_PIG	alpha-1-antichymotrypsin 2 precursor [Sus scrofa]
TGM2	F1SDX6_PIG	PREDICTED: protein-glutamine gamma-glutamyltransferase 2 [Sus scrofa]
VAMP5	A0A287AUN4_PIG	PREDICTED: vesicle-associated membrane protein 5-like [Sus scrofa]
ACTB	ACTB_PIG	cytoskeletal beta actin, partial [Sus scrofa]
FAP	K7GQN2_PIG	PREDICTED: prolyl endopeptidase FAP [Sus scrofa]
PHB	F2Z543_PIG	PREDICTED: prohibitin [Sus scrofa]
F11R	B2ZI35_PIG	junctional adhesion molecule A precursor [Sus scrofa]
SLC4A4	S4A4_PIG	RecName: Full=Electrogenic sodium bicarbonate cotransporter 1; Short=Sodium bicarbonate cotransporter; AltName: Full=Na(+)/HCO3(-) cotransporter; AltName: Full=Solute carrier family 4 member 4
CLDN7	C3VPJ4_PIG	PREDICTED: claudin-7 [Sus scrofa]
ITGA1	F1SMF6_PIG	PREDICTED: integrin alpha-1 [Sus scrofa]
ENPP6	F1RSZ8_PIG	PREDICTED: ectonucleotide pyrophosphatase/phosphodiesterase family member 6 [Sus scrofa]
CD276	F1SIC6_PIG	PREDICTED: CD276 antigen [Sus scrofa]
CLDN4	C3VML0_PIG	PREDICTED: claudin-4 isoform X1 [Sus scrofa]
CLDN3	C3VPJ5_PIG	claudin 3 variant 1 [Sus scrofa]
TSPAN9	TSN9_PIG	RecName: Full=Tetraspanin-9; Short=Tspan-9
LMAN2	F1S3D5_PIG	PREDICTED: vesicular integral-membrane protein VIP36 isoform X1 [Sus scrofa]
PNLIPRP1	F6Q1W0_PIG	inactive pancreatic lipase-related protein 1 precursor [Sus scrofa]
COL5A3	F1S3G7_PIG	collagen alpha-3(V) chain precursor [Sus scrofa]
LAMP2	F1RUC0_PIG	PREDICTED: lysosome-associated membrane glycoprotein 2 isoform X1 [Sus scrofa]
GCG	GLUC_PIG	RecName: Full=Glucagon; Contains: RecName: Full=Glicentin; Contains: RecName: Full=Glicentin-related polypeptide; Short=GRPP; Contains: RecName: Full=Oxyntomodulin; Short=OXM; Short=OXY; Contains: RecName: Full=Glucagon; Contains: RecName: Full=Glucagon-like peptide 1; Short=GLP-1; Contains: RecName: Full=Glucagon-like peptide 1(7-37); Short=GLP-1(7-37); Contains: RecName: Full=Glucagon-like pept…
CXADR	A0A287ALW2_PIG	PREDICTED: coxsackievirus and adenovirus receptor [Sus scrofa]
PHB2	I3LQN4_PIG	prohibitin-2 [Sus scrofa]
STX7	F1S3P8_PIG	PREDICTED: syntaxin-7 [Sus scrofa]
ANO10	F1SRD2_PIG	PREDICTED: anoctamin-10 [Sus scrofa]
SLCO2A1	Q2QEH5_PIG	solute carrier organic anion transporter family member 2A1 [Sus scrofa]
SCARB1	SCRB1_PIG	RecName: Full=Scavenger receptor class B member 1; Short=SRB1; AltName: Full=High density lipoprotein receptor SR-BI; AltName: Full=SR-BI
BCAM	I3L9I6_PIG	PREDICTED: basal cell adhesion molecule isoform X1 [Sus scrofa]
FGG	F1RX35_PIG	PREDICTED: fibrinogen gamma chain isoform X1 [Sus scrofa]
FLOT2	F1RNA6_PIG	PREDICTED: flotillin-2, partial [Sus scrofa]
BST1	K7GN83_PIG	PREDICTED: ADP-ribosyl cyclase/cyclic ADP-ribose hydrolase 2 [Sus scrofa]
KIAA1324	F1S5Z2_PIG	PREDICTED: UPF0577 protein KIAA1324 homolog isoform X1 [Sus scrofa]
RPS3	RS3_PIG	RecName: Full=40S ribosomal protein S3
APH1A	I3L8R2_PIG	gamma-secretase subunit APH-1A [Sus scrofa]
ATP5F1A	ATPA_PIG	RecName: Full=ATP synthase subunit alpha, mitochondrial; AltName: Full=ATP synthase subunit alpha heart isoform, mitochondrial; AltName: Full=ATP synthase subunit alpha liver isoform, mitochondrial; Flags: Precursor
NSF	A0A287AYL9_PIG	PREDICTED: vesicle-fusing ATPase isoform X1 [Sus scrofa]
SLC1A5	F1RM08_PIG	PREDICTED: neutral amino acid transporter B(0)-like [Sus scrofa]
ENPEP	AMPE_PIG	RecName: Full=Glutamyl aminopeptidase; Short=EAP; AltName: Full=Aminopeptidase A; Short=AP-A; AltName: CD_antigen=CD249
SERINC5	F1RF26_PIG	PREDICTED: serine incorporator 5 [Sus scrofa]
RAC2	I3LKU0_PIG	PREDICTED: ras-related C3 botulinum toxin substrate 2 isoform X1 [Sus scrofa]
SLC31A2	F1SN90_PIG	probable low affinity copper uptake protein 2 [Sus scrofa]
ATP1B3	A0A287B5A2_PIG	PREDICTED: sodium/potassium-transporting ATPase subunit beta-3 [Sus scrofa]
SNAP29	F1RKY1_PIG	PREDICTED: synaptosomal-associated protein 29 isoform X1 [Sus scrofa]
HSD17B12	I3LJY8_PIG	PREDICTED: very-long-chain 3-oxoacyl-CoA reductase [Sus scrofa]
DNAJB11	F1SFJ8_PIG	dnaJ homolog subfamily B member 11 precursor [Sus scrofa]
COL7A1	F1SKM1_PIG	PREDICTED: collagen alpha-1(VII) chain [Sus scrofa]
MUC6	I3LQZ3_PIG	PREDICTED: LOW QUALITY PROTEIN: mucin-6 [Sus scrofa]
S100A9	C3S7K6_PIG	RNA-binding region containing protein 2-like [Sus scrofa]
AQP1	AQP1_PIG	RecName: Full=Aquaporin-1; Short=AQP-1; AltName: Full=Aquaporin-CHIP; AltName: Full=Water channel protein for red blood cells and kidney proximal tubule
ENG	EGLN_PIG	RecName: Full=Endoglin; AltName: CD_antigen=CD105; Flags: Precursor
TEK	F1SP85_PIG	PREDICTED: angiopoietin-1 receptor [Sus scrofa]
EGFR	A0A286ZV23_PIG	epidermal growth factor receptor precursor [Sus scrofa]
DMBT1	DMBT1_PIG	RecName: Full=Deleted in malignant brain tumors 1 protein; AltName: Full=Hensin; Flags: Precursor
TMEM231	F1S455_PIG	PREDICTED: transmembrane protein 231 isoform X1 [Sus scrofa]
ATP8B1	F1SM35_PIG	PREDICTED: phospholipid-transporting ATPase IC [Sus scrofa]
PLPP3	A0A287BJK5_PIG	PREDICTED: lipid phosphate phosphohydrolase 3 isoform X1 [Sus scrofa]
ITGB4	K7GP66_PIG	PREDICTED: integrin beta-4 isoform X3 [Sus scrofa]
MME	F1SJM4_PIG	PREDICTED: neprilysin [Sus scrofa]
ELN	A0A287AXU0_PIG	PREDICTED: elastin-like [Sus scrofa]
LOX	F1RLC4_PIG	protein-lysine 6-oxidase precursor [Sus scrofa]
SLC29A1	A0A287AE03_PIG	PREDICTED: equilibrative nucleoside transporter 1 isoform X4 [Sus scrofa]
P4HB	G9F6X8_PIG	prolyl 4-hydroxylase beta polypeptide [Sus scrofa]
CLDN5	C3VML1_PIG	claudin-5 [Sus scrofa]
ITGB2	A8DSD5_PIG	integrin beta-2 precursor [Sus scrofa]
SLC4A1	K7GR72_PIG	PREDICTED: band 3 anion transport protein isoform X1 [Sus scrofa]
SPPL2B	A0A287BCL8_PIG	PREDICTED: signal peptide peptidase-like 2B isoform X1 [Sus scrofa]
TMEM30A	A0A287A5T0_PIG	PREDICTED: cell cycle control protein 50A [Sus scrofa]
PLSCR1	F4ZS19_PIG	phospholipid scramblase 1 [Sus scrofa]
STK39	I3LIX4_PIG	PREDICTED: STE20/SPS1-related proline-alanine-rich protein kinase [Sus scrofa]
C9	A0SEG9_PIG	complement component C9 precursor [Sus scrofa]
NPC1	F1SBB5_PIG	PREDICTED: Niemann-Pick C1 protein isoform X1 [Sus scrofa]
ATP9A	A5GFS1_PIG	probable phospholipid-transporting ATPase IIA [Sus scrofa]
ATP6V0A1	F1S1D6_PIG	PREDICTED: V-type proton ATPase 116 kDa subunit a isoform 1 isoform X1 [Sus scrofa]
HSPB1	A0A2C9F366_PIG	PREDICTED: heat shock protein beta-1 [Sus scrofa]
KIRREL1	K7GR16_PIG	PREDICTED: kin of IRRE-like protein 1 isoform X1 [Sus scrofa]
GNA11	GNA11_PIG	RecName: Full=Guanine nucleotide-binding protein subunit alpha-11; Short=G alpha-11; Short=G-protein subunit alpha-11
SYP	F1RW46_PIG	PREDICTED: synaptophysin [Sus scrofa]
CD151	F1RYZ1_PIG	PREDICTED: CD151 antigen isoform X1 [Sus scrofa]
MFSD10	F1S8P6_PIG	PREDICTED: major facilitator superfamily domain-containing protein 10 [Sus scrofa]
ITM2B	F1RK12_PIG	PREDICTED: integral membrane protein 2B isoform X1 [Sus scrofa]
GNG10	A0A287A462_PIG	PREDICTED: guanine nucleotide-binding protein G(I)/G(S)/G(O) subunit gamma-10 [Sus scrofa]
ARL6IP5	PRAF3_PIG	PRA1 family protein 2 [Sus scrofa]
ATP2B3	K7GRJ7_PIG	PREDICTED: plasma membrane calcium-transporting ATPase 3 isoform X1 [Sus scrofa]
SPPL2A	F1RYM5_PIG	PREDICTED: signal peptide peptidase-like 2A [Sus scrofa]
HNRNPU	A0A286ZVL0_PIG	PREDICTED: heterogeneous nuclear ribonucleoprotein U [Sus scrofa]
SERPINH1	A0A286ZRU9_PIG	serpin H1 precursor [Sus scrofa]
SERPINA1	A1AT_PIG	RecName: Full=Alpha-1-antitrypsin; AltName: Full=Alpha-1 protease inhibitor; AltName: Full=Alpha-1-antiproteinase; AltName: Full=Serpin A1; Flags: Precursor
EPX	F1RSB4_PIG	PREDICTED: eosinophil peroxidase [Sus scrofa]
C3	CO3_PIG	RecName: Full=Complement C3; Contains: RecName: Full=Complement C3 beta chain; Contains: RecName: Full=C3-beta-c; Short=C3bc; Contains: RecName: Full=Complement C3 alpha chain; Contains: RecName: Full=C3a anaphylatoxin; Contains: RecName: Full=Acylation stimulating protein; Short=ASP; AltName: Full=C3adesArg; Contains: RecName: Full=Complement C3b alpha' chain; Contains: RecName: Full=Complement …
SERPINI2	F1SH45_PIG	PREDICTED: serpin I2 isoform X1 [Sus scrofa]
VWF	K7GNN0_PIG	von Willebrand factor precursor [Sus scrofa]
LAMA3	F1SBB3_PIG	PREDICTED: laminin subunit alpha-3 [Sus scrofa]
MATN2	F1S0M0_PIG	PREDICTED: matrilin-2 [Sus scrofa]

## Sheet: Young-4
Gene symbol	UniProtKB entry name	Description
FBN1	FBN1_PIG	RecName: Full=Fibrillin-1; Contains: RecName: Full=Asprosin; Flags: Precursor
COL1A1	Q1HNM7_PIG	PREDICTED: collagen alpha-1(I) chain [Sus scrofa]
COL6A3	I3LUR7_PIG	PREDICTED: collagen alpha-3(VI) chain isoform X1 [Sus scrofa]
COL1A2	I3L781_PIG	collagen alpha-2(I) chain precursor [Sus scrofa]
COL4A1	M3V819_PIG	PREDICTED: collagen alpha-1(IV) chain [Sus scrofa]
COL1A1	A0A287A1S6_PIG	PREDICTED: collagen alpha-1(I) chain [Sus scrofa]
PGC	A0A286ZP41_PIG	PREDICTED: gastricsin isoform X1 [Sus scrofa]
COL4A2	F1RLL9_PIG	PREDICTED: collagen alpha-2(IV) chain [Sus scrofa]
CHIA	I3LL32_PIG	chitinase, acidic precursor [Sus scrofa]
COL5A2	A0A287BF88_PIG	collagen alpha-2(V) chain precursor [Sus scrofa]
SLA-DQB	Q8MHS9_PIG	MHC class II antigen [Sus scrofa]
SLA-DQB1	V9PQW0_PIG	MHC class II antigen [Sus scrofa]
HSPG2	F1SU03_PIG	PREDICTED: basement membrane-specific heparan sulfate proteoglycan core protein [Sus scrofa]
SLA-DRB1	B1A9N2_PIG	MHC class II antigen [Sus scrofa]
COL4A5	F1RXI2_PIG	PREDICTED: collagen alpha-5(IV) chain [Sus scrofa]
LAMC1	F1S663_PIG	laminin subunit gamma-1 precursor [Sus scrofa]
SLA-DQB	Q8MGX1_PIG	MHC class II antigen [Sus scrofa]
SLA-DQB1	B1A9M5_PIG	MHC class II antigen [Sus scrofa]
COL6A2	I3LQ84_PIG	PREDICTED: collagen alpha-2(VI) chain [Sus scrofa]
SLA-DRB	Q6Y1I7_PIG	MHC class II antigen [Sus scrofa]
LAMB1	F1SAE9_PIG	PREDICTED: laminin subunit beta-1 [Sus scrofa]
STOM_tv1	K9J6J2_PIG	PREDICTED: erythrocyte band 7 integral membrane protein [Sus scrofa]
FBN2	F1RKK1_PIG	PREDICTED: fibrillin-2, partial [Sus scrofa]
COL3A1	F1RYI8_PIG	collagen alpha-1(III) chain precursor [Sus scrofa]
SLA-DRB	Q860P3_PIG	MHC class II antigen [Sus scrofa]
SLA-DQA	A0A172Q3Y5_PIG	MHC class II antigen [Sus scrofa]
SLA-DR-alpha	Q31064_PIG	MHC class II DR-alpha, partial [Sus scrofa]
SLA-DRA1	Q7YNW7_PIG	MHC class II antigen [Sus scrofa]
SLA-2	Q2PT69_PIG	MHC class I antigen [Sus scrofa]
SLA-2	B1A9N7_PIG	MHC class I antigen [Sus scrofa]
SLA-3	Q8MHT8_PIG	MHC class I antigen [Sus scrofa]
ITGB1	K7GS94_PIG	PREDICTED: integrin beta-1 isoform X1 [Sus scrofa]
COL2A1	A0A286ZWS8_PIG	PREDICTED: collagen alpha-1(II) chain-like, partial [Sus scrofa]
SLA-2	A0A1C9J6F0_PIG	MHC class I antigen [Sus scrofa]
BGN	F1S2B6_PIG	PREDICTED: biglycan isoform X1 [Sus scrofa]
NID2	A0A287ALN1_PIG	PREDICTED: nidogen-2 isoform X1 [Sus scrofa]
TINAGL1	F1SVA2_PIG	PREDICTED: tubulointerstitial nephritis antigen-like isoform X1 [Sus scrofa]
DCN	F1SQ10_PIG	PREDICTED: decorin isoform X1 [Sus scrofa]
SLA-1	A0A0A7BZF2_PIG	MHC class I antigen [Sus scrofa]
LAMB2	F1SPT5_PIG	PREDICTED: LOW QUALITY PROTEIN: laminin subunit beta-2 [Sus scrofa]
CLPS	COL_PIG	RecName: Full=Colipase; AltName: Full=Procolipase II; Flags: Precursor
GP2	F1RPA7_PIG	PREDICTED: pancreatic secretory granule membrane major glycoprotein GP2 isoform X1 [Sus scrofa]
CD90	B9ZSM8_PIG	PREDICTED: thy-1 membrane glycoprotein isoform X1 [Sus scrofa]
GRN	F1RQZ0_PIG	granulins precursor [Sus scrofa]
DPEP1	DPEP1_PIG	RecName: Full=Dipeptidase 1; AltName: Full=Microsomal dipeptidase; AltName: Full=Renal dipeptidase; Flags: Precursor
LOC100153899	F1SCD0_PIG	PREDICTED: serpin A3-8 [Sus scrofa]
COL4A5	A0A287A007_PIG	PREDICTED: collagen alpha-6(IV) chain, partial [Sus scrofa]
CD61	Q95JH1_PIG	integrin beta-3 precursor [Sus scrofa]
SNAP23	A0A287AHK8_PIG	PREDICTED: synaptosomal-associated protein 23 isoform X1 [Sus scrofa]
CD59	CD59_PIG	RecName: Full=CD59 glycoprotein; AltName: Full=MAC-inhibitory protein; Short=MAC-IP; AltName: Full=Membrane attack complex inhibition factor; Short=MACIF; AltName: Full=Protectin; AltName: CD_antigen=CD59; Flags: Precursor
VDAC1	VDAC1_PIG	RecName: Full=Voltage-dependent anion-selective channel protein 1; Short=VDAC-1
ASPN	F1SUE4_PIG	asporin precursor [Sus scrofa]
ITGB4	K7GP66_PIG	PREDICTED: integrin beta-4 isoform X3 [Sus scrofa]
DPP4	DPP4_PIG	RecName: Full=Dipeptidyl peptidase 4; AltName: Full=Dipeptidyl peptidase IV; Short=DPP IV; AltName: Full=T-cell activation antigen CD26; AltName: CD_antigen=CD26; Contains: RecName: Full=Dipeptidyl peptidase 4 membrane form; AltName: Full=Dipeptidyl peptidase IV membrane form; Contains: RecName: Full=Dipeptidyl peptidase 4 soluble form; AltName: Full=Dipeptidyl peptidase IV soluble form
LAMP1	F1RN44_PIG	lysosome-associated membrane glycoprotein 1 precursor [Sus scrofa]
SLA-DQB	Q5DM15_PIG	MHC class II antigen, partial [Sus scrofa]
CAV2	G8GCE6_PIG	caveolin-2 [Sus scrofa]
PLGRKT	A0A286ZI26_PIG	PREDICTED: plasminogen receptor (KT) isoform X1 [Sus scrofa]
CAV1	CAV1_PIG	RecName: Full=Caveolin-1
CLDN3	C3VPJ5_PIG	claudin 3 variant 1 [Sus scrofa]
AGRN	I3LGD9_PIG	PREDICTED: LOW QUALITY PROTEIN: agrin [Sus scrofa]
LAMA4	F1RZM4_PIG	PREDICTED: LOW QUALITY PROTEIN: laminin subunit alpha-4 [Sus scrofa]
STX7	F1S3P8_PIG	PREDICTED: syntaxin-7 [Sus scrofa]
ITGA5	F1SR53_PIG	PREDICTED: integrin alpha-5 [Sus scrofa]
ATP1A1	AT1A1_PIG	RecName: Full=Sodium/potassium-transporting ATPase subunit alpha-1; Short=Na(+)/K(+) ATPase alpha-1 subunit; AltName: Full=Sodium pump subunit alpha-1; Flags: Precursor
ENPP6	F1RSZ8_PIG	PREDICTED: ectonucleotide pyrophosphatase/phosphodiesterase family member 6 [Sus scrofa]
BST1	K7GN83_PIG	PREDICTED: ADP-ribosyl cyclase/cyclic ADP-ribose hydrolase 2 [Sus scrofa]
SLCO2A1	Q2QEH5_PIG	solute carrier organic anion transporter family member 2A1 [Sus scrofa]
ITGA2	F1SMF4_PIG	integrin alpha-2 precursor [Sus scrofa]
NID1	F1RGY5_PIG	PREDICTED: LOW QUALITY PROTEIN: nidogen-1-like [Sus scrofa]
PNLIPRP2	F1S4T6_PIG	pancreatic lipase-related protein 2 precursor [Sus scrofa]
TFF2	TFF2_PIG	Chain A, Solution Structure Of A Trefoil-Motif-Containing Cell Growth Factor, Porcine Spasmolytic Protein
COL5A1	Q59IP3_PIG	collagen alpha-1(V) chain precursor [Sus scrofa]
DYSF	F1SLE7_PIG	PREDICTED: dysferlin isoform X1 [Sus scrofa]
VAMP5	A0A287AUN4_PIG	PREDICTED: vesicle-associated membrane protein 5-like [Sus scrofa]
ENG	EGLN_PIG	RecName: Full=Endoglin; AltName: CD_antigen=CD105; Flags: Precursor
ITGAV	A4USB0_PIG	integrin alpha V [Sus scrofa]
ERLIN2	A0A287BRP6_PIG	PREDICTED: erlin-2 isoform X1 [Sus scrofa]
TMED10	A0A286ZV95_PIG	PREDICTED: transmembrane emp24 domain-containing protein 10 [Sus scrofa]
KIAA1324	F1S5Z2_PIG	PREDICTED: UPF0577 protein KIAA1324 homolog isoform X1 [Sus scrofa]
BCAM	I3L9I6_PIG	PREDICTED: basal cell adhesion molecule isoform X1 [Sus scrofa]
STX1A	F1RGA3_PIG	PREDICTED: syntaxin-1A [Sus scrofa]
LMAN2	F1S3D5_PIG	PREDICTED: vesicular integral-membrane protein VIP36 isoform X1 [Sus scrofa]
CD276	F1SIC6_PIG	PREDICTED: CD276 antigen [Sus scrofa]
SERPINA1	A1AT_PIG	RecName: Full=Alpha-1-antitrypsin; AltName: Full=Alpha-1 protease inhibitor; AltName: Full=Alpha-1-antiproteinase; AltName: Full=Serpin A1; Flags: Precursor
PNLIPRP1	F6Q1W0_PIG	inactive pancreatic lipase-related protein 1 precursor [Sus scrofa]
EPX	F1RSB4_PIG	PREDICTED: eosinophil peroxidase [Sus scrofa]
COL6A6	A0A287A0A6_PIG	PREDICTED: collagen alpha-6(VI) chain [Sus scrofa]
TNC	TENA_PIG	RecName: Full=Tenascin; Short=TN; AltName: Full=Cytotactin; AltName: Full=GMEM; AltName: Full=GP 150-225; AltName: Full=Glioma-associated-extracellular matrix antigen; AltName: Full=Hexabrachion; AltName: Full=JI; AltName: Full=Myotendinous antigen; AltName: Full=Neuronectin; AltName: Full=P230; AltName: Full=Tenascin-C; Short=TN-C; Flags: Precursor
COL12A1	F1RQI0_PIG	PREDICTED: collagen alpha-1(XII) chain isoform X1 [Sus scrofa]
LOC100517891	F1RJ50_PIG	PREDICTED: serum amyloid P-component [Sus scrofa]
