# Supplementary material for: Proteomic and Bioinformatic Analysis of Decellularized Pancreatic Extracellular Matrices
Source: Molecules. 2021 Nov 8;26(21):6740. doi: 10.3390/molecules26216740 (PMC8588251; doi:10.3390/molecules26216740)
Supplement: Supplementary file 1 [file molecules-26-06740-s001.zip › Supplymental Table S4 proteins significantly regulated GO terms 10-14-2021.xlsx]

## Sheet: biological process
Category	Sample resourse	UniProtKB entry name	Gene symbol
Cellular process	Young	F1RSB4_PIG	EPX
Cellular process	Young	F1SLE7_PIG	DYSF
Cellular process	Young	RACK1_PIG	RACK1
Cellular process	Young	F1SJM4_PIG	MME
Cellular process	Young	B9ZSM8_PIG	CD90
Cellular process	Young	K7GP66_PIG	ITGB4
Cellular process	Young	A0A287A9D0_PIG	PTPRC
Cellular process	Young	A0A287BJK5_PIG	PLPP3
Cellular process	Young	F1SDX6_PIG	TGM2
Cellular process	Young	ADA10_PIG	ADAM10
Cellular process	Young	F1SM35_PIG	ATP8B1
Cellular process	Young	F1S829_PIG	WLS
Cellular process	Young	F1RWT7_PIG	AMOT
Cellular process	Young	A0A287A1S6_PIG	COL1A1
Cellular process	Young	I3L781_PIG	COL1A2
Cellular process	Young	F1RYI8_PIG	COL3A1
Cellular process	Young	F1RZM4_PIG	LAMA4
Cellular process	Young	A0A287BF88_PIG	COL5A2
Cellular process	Young	F1SPT5_PIG	LAMB2
Cellular process	Young	VDAC1_PIG	VDAC1
Cellular process	Young	K7GS94_PIG	ITGB1
Cellular process	Young	ATPA_PIG	ATP5F1A
Cellular process	Young	DPP4_PIG	DPP4
Cellular process	Young	F2Z543_PIG	PHB
Cellular process	Young	A0A287BRP6_PIG	ERLIN2
Cellular process	Young	CAV1_PIG	CAV1
Cellular process	Young	ACTB_PIG	ACTB
Cellular process	Young	DPEP1_PIG	DPEP1
Cellular process	Young	F1S2B6_PIG	BGN
Cellular process	Young	RS3_PIG	RPS3
Cellular process	Young	A7WLI1_PIG	CD81
Cellular process	Young	A0A286ZV95_PIG	TMED10
Cellular process	Young	A8DSD5_PIG	ITGB2
Cellular process	Young	F1SMF4_PIG	ITGA2
Cellular process	Young	AMPE_PIG	ENPEP
Cellular process	Young	F2Z5K3_PIG	RAP1A
Cellular process	Young	Q56P20_PIG	ARF4
Cellular process	Young	A0A2C9F366_PIG	HSPB1
Cellular process	Young	F1RIR2_PIG	STX4
Cellular process	Young	F1RYZ1_PIG	CD151
Cellular process	Young	F1RNA6_PIG	FLOT2
Cellular process	Young	AT1B1_PIG	ATP1B1
Cellular process	Young	SCRB1_PIG	SCARB1
Cellular process	Young	K7GN08_PIG	L1CAM
Cellular process	Young	F1SQ10_PIG	DCN
Cellular process	Young	F1SBB3_PIG	LAMA3
Cellular process	Young	F1SFJ8_PIG	DNAJB11
Cellular process	Young	I3LTE1_PIG	CPM
Cellular process	Young	F1S6B4_PIG	PRELP
Cellular process	Young	A0A0K1TQQ0_PIG	MGST2
Cellular process	Young	AQP1_PIG	AQP1
Cellular process	Young	F1SAE9_PIG	LAMB1
Cellular process	Young	F1S663_PIG	LAMC1
Cellular process	Young	F1S1B2_PIG	MPZ
Cellular process	Young	A0A286ZSI3_PIG	NCSTN
Cellular process	Young	F1S5Z2_PIG	KIAA1324
Cellular process	Young	I3LJB6_PIG	SACM1L
Cellular process	Young	F2Z5H6_PIG	ATP6V0D1
Cellular process	Young	F1RLL9_PIG	COL4A2
Cellular process	Young	F1RQI0_PIG	COL12A1
Cellular process	Young	F1SBE5_PIG	PTGIS
Cellular process	Young	K7GT68_PIG	ITGA6
Cellular process	Young	F1SGT4_PIG	CD44
Cellular process	Young	A0A287A649_PIG	EMP2
Cellular process	Young	A0A287A905_PIG	ANO6
Cellular process	Young	ARF6_PIG	ARF6
Cellular process	Young	F1RW75_PIG	DSP
Cellular process	Young	A0A286ZV23_PIG	EGFR
Cellular process	Young	A0A287BIL8_PIG	HSPA5
Cellular process	Young	CDC42_PIG	CDC42
Cellular process	Young	A0A287AU52_PIG	NPNT
Cellular process	Young	A0A286ZWS8_PIG	COL2A1
Cellular process	Young	F1RLC4_PIG	LOX
Cellular process	Young	I3L719_PIG	DPEP1
Cellular process	Young	Q06AS6_PIG	GNAI2
Cellular process	Young	K7GQN2_PIG	FAP
Cellular process	Young	F1SR53_PIG	ITGA5
Cellular process	Young	F1SS24_PIG	FN1
Cellular process	Young	B2ZI35_PIG	F11R
Cellular process	Young	F2Z5F2_PIG	RAB10
Cellular process	Young	A0A286ZSD7_PIG	STOML2
Cellular process	Young	F1S091_PIG	RAB8B
Cellular process	Young	Q95JH1_PIG	CD61
Cellular process	Young	F1SBB5_PIG	NPC1
Cellular process	Young	I3LKU0_PIG	RAC2
Cellular process	Young	G9F6X8_PIG	P4HB
Cellular process	Young	CY24B_PIG	CYBB
Cellular process	Young	F2Z5K4_PIG	RHOC
Cellular process	Young	HS90A_PIG	HSP90AA1
Cellular process	Young	F1SMF6_PIG	ITGA1
Cellular process	Young	F1S3P8_PIG	STX7
Cellular process	Young	K7GSR6_PIG	NT5E
Cellular process	Young	F1RFL9_PIG	ATP6V0A2
Cellular process	Young	I3L6W6_PIG	DNAJC1
Cellular process	Young	F1RVP8_PIG	TCIRG1
Cellular process	Young	F1RFQ6_PIG	STX2
Cellular process	Young	ANXA4_PIG	ANXA4
Cellular process	Young	A0A286ZVL0_PIG	HNRNPU
Cellular process	Young	PA21B_PIG	PLA2G1B
Cellular process	Young	A0A286ZRU9_PIG	SERPINH1
Cellular process	Young	CAP7_PIG	AZU1
Cellular process	Young	C3S7K6_PIG	S100A9
Cellular process	Young	F1RUC0_PIG	LAMP2
Cellular process	Young	A0A287BD93_PIG	CNP
Cellular process	Young	F1S455_PIG	TMEM231
Cellular process	Young	F1SKX7_PIG	COL8A1
Cellular process	Young	F1SLL5_PIG	PLPP1
Cellular process	Young	F1S8P1_PIG	SCCPDH
Cellular process	Young	I3L8R2_PIG	APH1A
Cellular process	Young	F1RSY4_PIG	SMPD2
Cellular process	Young	F1RF26_PIG	SERINC5
Cellular process	Young	F1SGJ4_PIG	ABHD6
Cellular process	Young	A0A287BHK8_PIG	ADAM22
Cellular process	Young	F1SPK8_PIG	CD63
Cellular process	Young	E1CAJ5_PIG	grp-58
Cellular process	Young	F1SN69_PIG	COL27A1
Cellular process	Young	I3L9F5_PIG	PCYOX1
Cellular process	Young	A0A287ALW2_PIG	CXADR
Cellular process	Young	DMBT1_PIG	DMBT1
Cellular process	Young	AT1A1_PIG	ATP1A1
Cellular process	Young	CAV2_PIG	CAV2
Cellular process	Young	F1RX35_PIG	FGG
Cellular process	Young	F1RKY1_PIG	SNAP29
Cellular process	Young	F4ZS19_PIG	PLSCR1
Cellular process	Young	I3LIX4_PIG	STK39
Cellular process	Young	F1RW46_PIG	SYP
Cellular process	Young	CO3_PIG	C3
Cellular process	Young	A0A287B843_PIG	CACNA2D1
Cellular process	Young	C3VML1_PIG	CLDN5
Cellular process	Young	F1RGA3_PIG	STX1A
Cellular process	Young	F1S4T6_PIG	PNLIPRP2
Cellular process	Adult	K7GS94_PIG	ITGB1
Cellular process	Adult	CAV1_PIG	CAV1
Cellular process	Adult	F1S2B6_PIG	BGN
Cellular process	Adult	Q95JH1_PIG	CD61
Cellular process	Adult	VDAC1_PIG	VDAC1
Cellular process	Adult	AMPE_PIG	ENPEP
Cellular process	Adult	PA21B_PIG	PLA2G1B
Cellular process	Adult	I3L781_PIG	COL1A2
Cellular process	Adult	A0A287A1S6_PIG	COL1A1
Cellular process	Adult	A0A287BF88_PIG	COL5A2
Cellular process	Adult	F1RYI8_PIG	COL3A1
Cellular process	Adult	A0A286ZWS8_PIG	COL2A1
Cellular process	Adult	F1RLC4_PIG	LOX
Cellular process	Adult	F1SQ10_PIG	DCN
Cellular process	Adult	F1S663_PIG	LAMC1
Cellular process	Adult	F1SAE9_PIG	LAMB1
Cellular process	Adult	F1RLL9_PIG	COL4A2
Cellular process	Adult	F1RSB4_PIG	EPX
Cellular process	Adult	B9ZSM8_PIG	CD90
Cellular process	Adult	A0A287BRP6_PIG	ERLIN2
Cellular process	Adult	ADA10_PIG	ADAM10
Cellular process	Adult	F1RPA9_PIG	UMOD
Cellular process	Adult	A0A287BJK5_PIG	PLPP3
Cellular process	Adult	K7GP66_PIG	ITGB4
Cellular process	Adult	F1SMF6_PIG	ITGA1
Cellular process	Adult	F1SR53_PIG	ITGA5
Cellular process	Adult	F1SMF4_PIG	ITGA2
Cellular process	Adult	F1S6B4_PIG	PRELP
Cellular process	Adult	F1SLL5_PIG	PLPP1
Cellular process	Adult	F1S1B2_PIG	MPZ
Cellular process	Adult	A7WLI1_PIG	CD81
Cellular process	Adult	F1SN69_PIG	COL27A1
Cellular process	Adult
Developmental process	Young	F1SLE7_PIG	DYSF
Developmental process	Young	RACK1_PIG	RACK1
Developmental process	Young	F1SJM4_PIG	MME
Developmental process	Young	B9ZSM8_PIG	CD90
Developmental process	Young	K7GP66_PIG	ITGB4
Developmental process	Young	A0A287A9D0_PIG	PTPRC
Developmental process	Young	A0A287BJK5_PIG	PLPP3
Developmental process	Young	F1SDX6_PIG	TGM2
Developmental process	Young	ADA10_PIG	ADAM10
Developmental process	Young	F1SM35_PIG	ATP8B1
Developmental process	Young	F1S829_PIG	WLS
Developmental process	Young	F1RWT7_PIG	AMOT
Developmental process	Young	A0A287A1S6_PIG	COL1A1
Developmental process	Young	I3L781_PIG	COL1A2
Developmental process	Young	F1RYI8_PIG	COL3A1
Developmental process	Young	F1RZM4_PIG	LAMA4
Developmental process	Young	A0A287BF88_PIG	COL5A2
Developmental process	Young	F1SPT5_PIG	LAMB2
Developmental process	Young	AQP1_PIG	AQP1
Developmental process	Young	F1SAE9_PIG	LAMB1
Developmental process	Young	F1S663_PIG	LAMC1
Developmental process	Young	EGLN_PIG	ENG
Developmental process	Young	F1SHN1_PIG	CNTN1
Developmental process	Young	I3LQN4_PIG	PHB2
Developmental process	Young	A0A287AXU0_PIG	ELN
Developmental process	Young	F1RKK1_PIG	FBN2
Developmental process	Young	F1SUE4_PIG	ASPN
Developmental process	Young	I3LGD9_PIG	AGRN
Developmental process	Young	A0A287AUN4_PIG	VAMP5
Developmental process	Young	I3LSV6_PIG	COL2A1
Developmental process	Young	F1SBE5_PIG	PTGIS
Developmental process	Young	K7GT68_PIG	ITGA6
Developmental process	Young	F1SGT4_PIG	CD44
Developmental process	Young	A0A287A649_PIG	EMP2
Developmental process	Young	A0A287A905_PIG	ANO6
Developmental process	Young	ARF6_PIG	ARF6
Developmental process	Young	F1RW75_PIG	DSP
Developmental process	Young	A0A286ZV23_PIG	EGFR
Developmental process	Young	A0A287BIL8_PIG	HSPA5
Developmental process	Young	CDC42_PIG	CDC42
Developmental process	Young	A0A287AU52_PIG	NPNT
Developmental process	Young	A0A286ZWS8_PIG	COL2A1
Developmental process	Young	F1RLC4_PIG	LOX
Developmental process	Young	F1S455_PIG	TMEM231
Developmental process	Young	F1SKX7_PIG	COL8A1
Developmental process	Young	A0A287ALW2_PIG	CXADR
Developmental process	Young	DMBT1_PIG	DMBT1
Developmental process	Young	F1SP85_PIG	TEK
Developmental process	Adult	I3L781_PIG	COL1A2
Developmental process	Adult	A0A287A1S6_PIG	COL1A1
Developmental process	Adult	A0A287BF88_PIG	COL5A2
Developmental process	Adult	F1RYI8_PIG	COL3A1
Developmental process	Adult	A0A286ZWS8_PIG	COL2A1
Developmental process	Adult	F1RLC4_PIG	LOX
Developmental process	Adult	F1S663_PIG	LAMC1
Developmental process	Adult	F1SAE9_PIG	LAMB1
Developmental process	Adult	A0A287AUN4_PIG	VAMP5
Developmental process	Adult	B9ZSM8_PIG	CD90
Developmental process	Adult	ADA10_PIG	ADAM10
Developmental process	Adult	F1RPA9_PIG	UMOD
Developmental process	Adult	A0A287BJK5_PIG	PLPP3
Developmental process	Adult	K7GP66_PIG	ITGB4
Developmental process	Adult	F1RKK1_PIG	FBN2
Developmental process	Adult	I3LSV6_PIG	COL2A1
Developmental process	Adult
Interaction with cells and organisms	Young	F1SLE7_PIG	DYSF
Interaction with cells and organisms	Young	F1SJM4_PIG	MME
Interaction with cells and organisms	Young	B9ZSM8_PIG	CD90
Interaction with cells and organisms	Young	K7GP66_PIG	ITGB4
Interaction with cells and organisms	Young	A0A287A9D0_PIG	PTPRC
Interaction with cells and organisms	Young	A0A287BJK5_PIG	PLPP3
Interaction with cells and organisms	Young	F1SDX6_PIG	TGM2
Interaction with cells and organisms	Young	ADA10_PIG	ADAM10
Interaction with cells and organisms	Young	F1SM35_PIG	ATP8B1
Interaction with cells and organisms	Young	A0A287A1S6_PIG	COL1A1
Interaction with cells and organisms	Young	F1RYI8_PIG	COL3A1
Interaction with cells and organisms	Young	F1RZM4_PIG	LAMA4
Interaction with cells and organisms	Young	F1SPT5_PIG	LAMB2
Interaction with cells and organisms	Young	F1SAE9_PIG	LAMB1
Interaction with cells and organisms	Young	F1S663_PIG	LAMC1
Interaction with cells and organisms	Young	EGLN_PIG	ENG
Interaction with cells and organisms	Young	K7GS94_PIG	ITGB1
Interaction with cells and organisms	Young	DPP4_PIG	DPP4
Interaction with cells and organisms	Young	CAV1_PIG	CAV1
Interaction with cells and organisms	Young	RS3_PIG	RPS3
Interaction with cells and organisms	Young	A8DSD5_PIG	ITGB2
Interaction with cells and organisms	Young	F1SMF4_PIG	ITGA2
Interaction with cells and organisms	Young	F1RNA6_PIG	FLOT2
Interaction with cells and organisms	Young	AT1B1_PIG	ATP1B1
Interaction with cells and organisms	Young	SCRB1_PIG	SCARB1
Interaction with cells and organisms	Young	K7GN08_PIG	L1CAM
Interaction with cells and organisms	Young	F1SBB3_PIG	LAMA3
Interaction with cells and organisms	Young	F1S1B2_PIG	MPZ
Interaction with cells and organisms	Young	A0A287ALN1_PIG	NID2
Interaction with cells and organisms	Young	F1SRM1_PIG	MYO10
Interaction with cells and organisms	Young	F1RX37_PIG	FGB
Interaction with cells and organisms	Young	I3LL32_PIG	CHIA
Interaction with cells and organisms	Young	F1SVA2_PIG	TINAGL1
Interaction with cells and organisms	Young	I3LJY8_PIG	HSD17B12
Interaction with cells and organisms	Young	F1SQ09_PIG	LUM
Interaction with cells and organisms	Young	CD47_PIG	CD47
Interaction with cells and organisms	Young	A4USB0_PIG	ITGAV
Interaction with cells and organisms	Young	A8DNU5_PIG	ITGAL
Interaction with cells and organisms	Young	K7GT68_PIG	ITGA6
Interaction with cells and organisms	Young	F1SGT4_PIG	CD44
Interaction with cells and organisms	Young	A0A287A649_PIG	EMP2
Interaction with cells and organisms	Young	F1RW75_PIG	DSP
Interaction with cells and organisms	Young	A0A286ZV23_PIG	EGFR
Interaction with cells and organisms	Young	CDC42_PIG	CDC42
Interaction with cells and organisms	Young	A0A287AU52_PIG	NPNT
Interaction with cells and organisms	Young	A0A286ZWS8_PIG	COL2A1
Interaction with cells and organisms	Young	F1SKX7_PIG	COL8A1
Interaction with cells and organisms	Young	F1SR53_PIG	ITGA5
Interaction with cells and organisms	Young	F1SS24_PIG	FN1
Interaction with cells and organisms	Young	B2ZI35_PIG	F11R
Interaction with cells and organisms	Young	A0A286ZSD7_PIG	STOML2
Interaction with cells and organisms	Young	Q95JH1_PIG	CD61
Interaction with cells and organisms	Young	I3LKU0_PIG	RAC2
Interaction with cells and organisms	Young	K7GSR6_PIG	NT5E
Interaction with cells and organisms	Young	F1RFQ6_PIG	STX2
Interaction with cells and organisms	Young	PA21B_PIG	PLA2G1B
Interaction with cells and organisms	Young	CAP7_PIG	AZU1
Interaction with cells and organisms	Young	C3S7K6_PIG	S100A9
Interaction with cells and organisms	Young	F1SPK8_PIG	CD63
Interaction with cells and organisms	Young	PLAK_PIG	Jup
Interaction with cells and organisms	Young	I3LBB2_PIG	VPS35
Interaction with cells and organisms	Young	C6EVT4_PIG	CDH1
Interaction with cells and organisms	Young	F1S2A8_PIG	BCAP31
Interaction with cells and organisms	Young	F1RGY5_PIG	NID1
Interaction with cells and organisms	Young	PECA1_PIG	PECAM1
Interaction with cells and organisms	Young	G3FNU5_PIG	ITGB5
Interaction with cells and organisms	Young	K7GN83_PIG	BST1
Interaction with cells and organisms	Young	F1SM72_PIG	NCAM1
Interaction with cells and organisms	Young	A0A024CBD6_PIG	CD46
Interaction with cells and organisms	Young	TENA_PIG	TNC
Interaction with cells and organisms	Young	COL_PIG	CLPS
Interaction with cells and organisms	Young	A0A287ALW2_PIG	CXADR
Interaction with cells and organisms	Young	F1RX35_PIG	FGG
Interaction with cells and organisms	Young	I3L9I6_PIG	BCAM
Interaction with cells and organisms	Young	K7GR16_PIG	KIRREL1
Interaction with cells and organisms	Young	BGH3_PIG	TGFBI
Interaction with cells and organisms	Young	F1S3G7_PIG	COL5A3
Interaction with cells and organisms	Adult	A0A287A1S6_PIG	COL1A1
Interaction with cells and organisms	Adult	F1RYI8_PIG	COL3A1
Interaction with cells and organisms	Adult	A0A286ZWS8_PIG	COL2A1
Interaction with cells and organisms	Adult	F1S663_PIG	LAMC1
Interaction with cells and organisms	Adult	F1SAE9_PIG	LAMB1
Interaction with cells and organisms	Adult	K7GS94_PIG	ITGB1
Interaction with cells and organisms	Adult	CAV1_PIG	CAV1
Interaction with cells and organisms	Adult	Q95JH1_PIG	CD61
Interaction with cells and organisms	Adult	PA21B_PIG	PLA2G1B
Interaction with cells and organisms	Adult	I3LL32_PIG	CHIA
Interaction with cells and organisms	Adult	F1S3G7_PIG	COL5A3
Interaction with cells and organisms	Adult	COL_PIG	CLPS
Interaction with cells and organisms	Adult	TENA_PIG	TNC
Interaction with cells and organisms	Adult	B9ZSM8_PIG	CD90
Interaction with cells and organisms	Adult	ADA10_PIG	ADAM10
Interaction with cells and organisms	Adult	F1RPA9_PIG	UMOD
Interaction with cells and organisms	Adult	A0A287BJK5_PIG	PLPP3
Interaction with cells and organisms	Adult	K7GP66_PIG	ITGB4
Interaction with cells and organisms	Adult	F1SR53_PIG	ITGA5
Interaction with cells and organisms	Adult	F1SMF4_PIG	ITGA2
Interaction with cells and organisms	Adult	F1S1B2_PIG	MPZ
Interaction with cells and organisms	Adult	A0A287ALN1_PIG	NID2
Interaction with cells and organisms	Adult	F1SVA2_PIG	TINAGL1
Interaction with cells and organisms	Adult	F1RGY5_PIG	NID1
Interaction with cells and organisms	Adult	A0A024CBD6_PIG	CD46
Interaction with cells and organisms	Adult	PLAK_PIG	Jup
Interaction with cells and organisms	Adult
Regulation	Young	F1SLE7_PIG	DYSF
Regulation	Young	B9ZSM8_PIG	CD90
Regulation	Young	K7GP66_PIG	ITGB4
Regulation	Young	A0A287A9D0_PIG	PTPRC
Regulation	Young	A0A287BJK5_PIG	PLPP3
Regulation	Young	F1SDX6_PIG	TGM2
Regulation	Young	ADA10_PIG	ADAM10
Regulation	Young	F1SM35_PIG	ATP8B1
Regulation	Young	A0A287A1S6_PIG	COL1A1
Regulation	Young	F1RYI8_PIG	COL3A1
Regulation	Young	F1RZM4_PIG	LAMA4
Regulation	Young	F1SAE9_PIG	LAMB1
Regulation	Young	EGLN_PIG	ENG
Regulation	Young	K7GS94_PIG	ITGB1
Regulation	Young	DPP4_PIG	DPP4
Regulation	Young	CAV1_PIG	CAV1
Regulation	Young	RS3_PIG	RPS3
Regulation	Young	A8DSD5_PIG	ITGB2
Regulation	Young	F1SMF4_PIG	ITGA2
Regulation	Young	F1RNA6_PIG	FLOT2
Regulation	Young	AT1B1_PIG	ATP1B1
Regulation	Young	SCRB1_PIG	SCARB1
Regulation	Young	F1SBB3_PIG	LAMA3
Regulation	Young	F1SRM1_PIG	MYO10
Regulation	Young	F1RX37_PIG	FGB
Regulation	Young	I3LL32_PIG	CHIA
Regulation	Young	F1SQ09_PIG	LUM
Regulation	Young	CD47_PIG	CD47
Regulation	Young	A4USB0_PIG	ITGAV
Regulation	Young	A8DNU5_PIG	ITGAL
Regulation	Young	RACK1_PIG	RACK1
Regulation	Young	F1S829_PIG	WLS
Regulation	Young	F1RWT7_PIG	AMOT
Regulation	Young	I3L781_PIG	COL1A2
Regulation	Young	A0A287BF88_PIG	COL5A2
Regulation	Young	AQP1_PIG	AQP1
Regulation	Young	F1SHN1_PIG	CNTN1
Regulation	Young	I3LQN4_PIG	PHB2
Regulation	Young	A0A287AXU0_PIG	ELN
Regulation	Young	F1RKK1_PIG	FBN2
Regulation	Young	F1SUE4_PIG	ASPN
Regulation	Young	I3LGD9_PIG	AGRN
Regulation	Young	F1RSB4_PIG	EPX
Regulation	Young	F2Z543_PIG	PHB
Regulation	Young	A0A287BRP6_PIG	ERLIN2
Regulation	Young	ACTB_PIG	ACTB
Regulation	Young	DPEP1_PIG	DPEP1
Regulation	Young	A7WLI1_PIG	CD81
Regulation	Young	A0A286ZV95_PIG	TMED10
Regulation	Young	AMPE_PIG	ENPEP
Regulation	Young	F2Z5K3_PIG	RAP1A
Regulation	Young	Q56P20_PIG	ARF4
Regulation	Young	A0A2C9F366_PIG	HSPB1
Regulation	Young	F1RIR2_PIG	STX4
Regulation	Young	F1RYZ1_PIG	CD151
Regulation	Young	F1SQ10_PIG	DCN
Regulation	Young	F1SFJ8_PIG	DNAJB11
Regulation	Young	A0A286ZSI3_PIG	NCSTN
Regulation	Young	F1S5Z2_PIG	KIAA1324
Regulation	Young	F2Z5H6_PIG	ATP6V0D1
Regulation	Young	F1RLL9_PIG	COL4A2
Regulation	Young	K9J6J2_PIG	STOM_tv1
Regulation	Young	F1RN44_PIG	LAMP1
Regulation	Young	CD59_PIG	CD59
Regulation	Young	F1SB90_PIG	GNAI1
Regulation	Young	F1S3D5_PIG	LMAN2
Regulation	Young	F1RZR0_PIG	ITPR3
Regulation	Young	F1S1D6_PIG	ATP6V0A1
Regulation	Young	F1RK12_PIG	ITM2B
Regulation	Young	A5GFS1_PIG	ATP9A
Regulation	Young	K7GS03_PIG	LRP1
Regulation	Young	F1SEQ6_PIG	TSPAN14
Regulation	Young	A0A287AHK8_PIG	SNAP23
Regulation	Young	FBN1_PIG	FBN1
Regulation	Young	F1RX36_PIG	FGA
Regulation	Young	GLUC_PIG	GCG
Regulation	Young	C3VML0_PIG	CLDN4
Regulation	Young	A0A286ZI26_PIG	PLGRKT
Regulation	Young	S4A4_PIG	SLC4A4
Regulation	Young	F1SML5_PIG	LRRC4
Regulation	Young	F1SCD0_PIG	LOC100153899
Regulation	Young	I3LQZ3_PIG	MUC6
Regulation	Young	F1SCC7_PIG	LOC396684
Regulation	Young	Q9GMA6_PIG	SERPINA3-2
Regulation	Young	K7GT68_PIG	ITGA6
Regulation	Young	F1SGT4_PIG	CD44
Regulation	Young	A0A287A649_PIG	EMP2
Regulation	Young	F1RW75_PIG	DSP
Regulation	Young	A0A286ZV23_PIG	EGFR
Regulation	Young	CDC42_PIG	CDC42
Regulation	Young	A0A287AU52_PIG	NPNT
Regulation	Young	A0A286ZWS8_PIG	COL2A1
Regulation	Young	F1SR53_PIG	ITGA5
Regulation	Young	F1SS24_PIG	FN1
Regulation	Young	B2ZI35_PIG	F11R
Regulation	Young	A0A286ZSD7_PIG	STOML2
Regulation	Young	Q95JH1_PIG	CD61
Regulation	Young	I3LKU0_PIG	RAC2
Regulation	Young	K7GSR6_PIG	NT5E
Regulation	Young	F1RFQ6_PIG	STX2
Regulation	Young	PA21B_PIG	PLA2G1B
Regulation	Young	CAP7_PIG	AZU1
Regulation	Young	C3S7K6_PIG	S100A9
Regulation	Young	F1SPK8_PIG	CD63
Regulation	Young	PLAK_PIG	Jup
Regulation	Young	I3LBB2_PIG	VPS35
Regulation	Young	F1S2A8_PIG	BCAP31
Regulation	Young	G3FNU5_PIG	ITGB5
Regulation	Young	K7GN83_PIG	BST1
Regulation	Young	A0A024CBD6_PIG	CD46
Regulation	Young	F1SBE5_PIG	PTGIS
Regulation	Young	A0A287A905_PIG	ANO6
Regulation	Young	ARF6_PIG	ARF6
Regulation	Young	A0A287BIL8_PIG	HSPA5
Regulation	Young	F1S455_PIG	TMEM231
Regulation	Young	I3L719_PIG	DPEP1
Regulation	Young	Q06AS6_PIG	GNAI2
Regulation	Young	K7GQN2_PIG	FAP
Regulation	Young	F2Z5F2_PIG	RAB10
Regulation	Young	F1S091_PIG	RAB8B
Regulation	Young	F1SBB5_PIG	NPC1
Regulation	Young	G9F6X8_PIG	P4HB
Regulation	Young	CY24B_PIG	CYBB
Regulation	Young	F2Z5K4_PIG	RHOC
Regulation	Young	HS90A_PIG	HSP90AA1
Regulation	Young	F1SMF6_PIG	ITGA1
Regulation	Young	F1S3P8_PIG	STX7
Regulation	Young	F1RFL9_PIG	ATP6V0A2
Regulation	Young	I3L6W6_PIG	DNAJC1
Regulation	Young	F1RVP8_PIG	TCIRG1
Regulation	Young	ANXA4_PIG	ANXA4
Regulation	Young	A0A286ZVL0_PIG	HNRNPU
Regulation	Young	F1RUC0_PIG	LAMP2
Regulation	Young	I3L8R2_PIG	APH1A
Regulation	Young	F1SGJ4_PIG	ABHD6
Regulation	Young	E1CAJ5_PIG	grp-58
Regulation	Young	F1RYT3_PIG	SCARB2
Regulation	Young	F1SB67_PIG	IGF2R
Regulation	Young	F1SD42_PIG	ADGRE5
Regulation	Young	AT2B1_PIG	ATP2B1
Regulation	Young	A0A287AYL9_PIG	NSF
Regulation	Young	GNA11_PIG	GNA11
Regulation	Young	F1RPZ7_PIG	RHAG
Regulation	Young	F1RYM5_PIG	SPPL2A
Regulation	Young	COF1_PIG	CFL1
Regulation	Young	F1RQZ0_PIG	GRN
Regulation	Young	RADI_PIG	RDX
Regulation	Young	I3LMK2_PIG	TFF2
Regulation	Young	F1SD87_PIG	FBLN5
Regulation	Young	PRAF3_PIG	ARL6IP5
Regulation	Young	A0A287A5T0_PIG	TMEM30A
Regulation	Young	TSN9_PIG	TSPAN9
Regulation	Young	CML1_PIG	CMLKR1
Regulation	Young	A0A286ZP41_PIG	PGC
Regulation	Young	F1SCC9_PIG	LOC106504545
Regulation	Young	F1RJX8_PIG	COPA
Regulation	Young	NEC2_PIG	PCSK2
Regulation	Young	A1AT_PIG	SERPINA1
Regulation	Young	F2Z5B1_PIG	SERPINB1
Regulation	Young	A0A287ALW2_PIG	CXADR
Regulation	Young	F1RX35_PIG	FGG
Regulation	Young	K7GR16_PIG	KIRREL1
Regulation	Young	F1SP85_PIG	TEK
Regulation	Young	AT1A1_PIG	ATP1A1
Regulation	Young	CAV2_PIG	CAV2
Regulation	Young	F1RKY1_PIG	SNAP29
Regulation	Young	F4ZS19_PIG	PLSCR1
Regulation	Young	I3LIX4_PIG	STK39
Regulation	Young	F1RW46_PIG	SYP
Regulation	Young	CO3_PIG	C3
Regulation	Young	A0A287B843_PIG	CACNA2D1
Regulation	Young	C3VML1_PIG	CLDN5
Regulation	Young	F1SIC6_PIG	CD276
Regulation	Young	A0A287BCL8_PIG	SPPL2B
Regulation	Young	F1S4T9_PIG	PNLIP
Regulation	Young	F1SN90_PIG	SLC31A2
Regulation	Young	A0A287A462_PIG	GNG10
Regulation	Young	F1SH45_PIG	SERPINI2
Regulation	Young	F1RGA3_PIG	STX1A
Regulation	Young	TFF2_PIG	TFF2
Regulation	Adult	A0A287A1S6_PIG	COL1A1
Regulation	Adult	F1RYI8_PIG	COL3A1
Regulation	Adult	A0A286ZWS8_PIG	COL2A1
Regulation	Adult	F1SAE9_PIG	LAMB1
Regulation	Adult	K7GS94_PIG	ITGB1
Regulation	Adult	CAV1_PIG	CAV1
Regulation	Adult	Q95JH1_PIG	CD61
Regulation	Adult	PA21B_PIG	PLA2G1B
Regulation	Adult	I3LL32_PIG	CHIA
Regulation	Adult	I3L781_PIG	COL1A2
Regulation	Adult	A0A287BF88_PIG	COL5A2
Regulation	Adult	AMPE_PIG	ENPEP
Regulation	Adult	F1SQ10_PIG	DCN
Regulation	Adult	F1RLL9_PIG	COL4A2
Regulation	Adult	K9J6J2_PIG	STOM_tv1
Regulation	Adult	F1RQZ0_PIG	GRN
Regulation	Adult	A0A287AHK8_PIG	SNAP23
Regulation	Adult	CD59_PIG	CD59
Regulation	Adult	K7GS03_PIG	LRP1
Regulation	Adult	FBN1_PIG	FBN1
Regulation	Adult	F1S4T9_PIG	PNLIP
Regulation	Adult	I3LMK2_PIG	TFF2
Regulation	Adult	A0A286ZP41_PIG	PGC
Regulation	Adult	F1SCD0_PIG	LOC100153899
Regulation	Adult	I3LQZ3_PIG	MUC6
Regulation	Adult	B9ZSM8_PIG	CD90
Regulation	Adult	ADA10_PIG	ADAM10
Regulation	Adult	F1RPA9_PIG	UMOD
Regulation	Adult	A0A287BJK5_PIG	PLPP3
Regulation	Adult	K7GP66_PIG	ITGB4
Regulation	Adult	F1SR53_PIG	ITGA5
Regulation	Adult	F1SMF4_PIG	ITGA2
Regulation	Adult	A0A024CBD6_PIG	CD46
Regulation	Adult	F1RKK1_PIG	FBN2
Regulation	Adult	F1RSB4_PIG	EPX
Regulation	Adult	A0A287BRP6_PIG	ERLIN2
Regulation	Adult	F1SMF6_PIG	ITGA1
Regulation	Adult	F1RN44_PIG	LAMP1
Regulation	Adult	F1SCC7_PIG	LOC396684
Regulation	Adult	PLAK_PIG	Jup
Regulation	Adult	A7WLI1_PIG	CD81
Regulation	Adult	F1SUX4_PIG	NUMA1
Regulation	Adult
Other	Young	F1SLE7_PIG	DYSF
Other	Young	B9ZSM8_PIG	CD90
Other	Young	K7GP66_PIG	ITGB4
Other	Young	A0A287A9D0_PIG	PTPRC
Other	Young	F1SM35_PIG	ATP8B1
Other	Young	A0A287A1S6_PIG	COL1A1
Other	Young	F1RYI8_PIG	COL3A1
Other	Young	F1SAE9_PIG	LAMB1
Other	Young	CAV1_PIG	CAV1
Other	Young	RS3_PIG	RPS3
Other	Young	F1RNA6_PIG	FLOT2
Other	Young	AT1B1_PIG	ATP1B1
Other	Young	SCRB1_PIG	SCARB1
Other	Young	F1RX37_PIG	FGB
Other	Young	F1SQ09_PIG	LUM
Other	Young	RACK1_PIG	RACK1
Other	Young	F1RWT7_PIG	AMOT
Other	Young	I3L781_PIG	COL1A2
Other	Young	A0A287BF88_PIG	COL5A2
Other	Young	AQP1_PIG	AQP1
Other	Young	F1SHN1_PIG	CNTN1
Other	Young	I3LQN4_PIG	PHB2
Other	Young	A0A287AXU0_PIG	ELN
Other	Young	I3LGD9_PIG	AGRN
Other	Young	F2Z543_PIG	PHB
Other	Young	A7WLI1_PIG	CD81
Other	Young	A0A286ZV95_PIG	TMED10
Other	Young	AMPE_PIG	ENPEP
Other	Young	Q56P20_PIG	ARF4
Other	Young	F1RIR2_PIG	STX4
Other	Young	A0A286ZSI3_PIG	NCSTN
Other	Young	F1S5Z2_PIG	KIAA1324
Other	Young	F1RLL9_PIG	COL4A2
Other	Young	K9J6J2_PIG	STOM_tv1
Other	Young	F1S3D5_PIG	LMAN2
Other	Young	F1SEQ6_PIG	TSPAN14
Other	Young	F1RX36_PIG	FGA
Other	Young	F1SML5_PIG	LRRC4
Other	Young	F1SPT5_PIG	LAMB2
Other	Young	F1S663_PIG	LAMC1
Other	Young	K7GN08_PIG	L1CAM
Other	Young	F1S1B2_PIG	MPZ
Other	Young	I3LJY8_PIG	HSD17B12
Other	Young	A0A287AUN4_PIG	VAMP5
Other	Young	I3LSV6_PIG	COL2A1
Other	Young	F1RQI0_PIG	COL12A1
Other	Young	I3LUR7_PIG	COL6A3
Other	Young	I3LQ84_PIG	COL6A2
Other	Young	G8GCE6_PIG	CAV2
Other	Young	F1RM08_PIG	SLC1A5
Other	Young	F1SFA7_PIG	COL1A2
Other	Young	K7GT68_PIG	ITGA6
Other	Young	A0A287A649_PIG	EMP2
Other	Young	F1RW75_PIG	DSP
Other	Young	A0A286ZV23_PIG	EGFR
Other	Young	CDC42_PIG	CDC42
Other	Young	A0A287AU52_PIG	NPNT
Other	Young	A0A286ZWS8_PIG	COL2A1
Other	Young	F1SR53_PIG	ITGA5
Other	Young	F1SS24_PIG	FN1
Other	Young	B2ZI35_PIG	F11R
Other	Young	A0A286ZSD7_PIG	STOML2
Other	Young	Q95JH1_PIG	CD61
Other	Young	I3LKU0_PIG	RAC2
Other	Young	F1RFQ6_PIG	STX2
Other	Young	PLAK_PIG	Jup
Other	Young	I3LBB2_PIG	VPS35
Other	Young	A0A287A905_PIG	ANO6
Other	Young	ARF6_PIG	ARF6
Other	Young	F1S455_PIG	TMEM231
Other	Young	Q06AS6_PIG	GNAI2
Other	Young	K7GQN2_PIG	FAP
Other	Young	F2Z5F2_PIG	RAB10
Other	Young	F1S091_PIG	RAB8B
Other	Young	F1SBB5_PIG	NPC1
Other	Young	F2Z5K4_PIG	RHOC
Other	Young	F1S3P8_PIG	STX7
Other	Young	F1RUC0_PIG	LAMP2
Other	Young	A0A287AYL9_PIG	NSF
Other	Young	COF1_PIG	CFL1
Other	Young	F1SD87_PIG	FBLN5
Other	Young	F1SKX7_PIG	COL8A1
Other	Young	F1RGY5_PIG	NID1
Other	Young	F1SM72_PIG	NCAM1
Other	Young	F1RLC4_PIG	LOX
Other	Young	A0A286ZRU9_PIG	SERPINH1
Other	Young	A0A287BD93_PIG	CNP
Other	Young	A0A287BHK8_PIG	ADAM22
Other	Young	F1SN69_PIG	COL27A1
Other	Young	C0MHR2_PIG	CLTC
Other	Young	GTR1_PIG	SLC2A1
Other	Young	F1RXI2_PIG	COL4A5
Other	Young	A0A287ALW2_PIG	CXADR
Other	Young	F1RX35_PIG	FGG
Other	Young	F1SP85_PIG	TEK
Other	Young	CAV2_PIG	CAV2
Other	Young	F1RKY1_PIG	SNAP29
Other	Young	BGH3_PIG	TGFBI
Other	Young	F1S3G7_PIG	COL5A3
Other	Young	F1SKM1_PIG	COL7A1
Other	Young	F1S0M0_PIG	MATN2
Other	Young	F1RGA3_PIG	STX1A
Other	Adult	A0A287A1S6_PIG	COL1A1
Other	Adult	F1RYI8_PIG	COL3A1
Other	Adult	A0A286ZWS8_PIG	COL2A1
Other	Adult	F1SAE9_PIG	LAMB1
Other	Adult	CAV1_PIG	CAV1
Other	Adult	Q95JH1_PIG	CD61
Other	Adult	I3L781_PIG	COL1A2
Other	Adult	A0A287BF88_PIG	COL5A2
Other	Adult	AMPE_PIG	ENPEP
Other	Adult	F1RLL9_PIG	COL4A2
Other	Adult	K9J6J2_PIG	STOM_tv1
Other	Adult	F1S663_PIG	LAMC1
Other	Adult	F1S3G7_PIG	COL5A3
Other	Adult	F1RLC4_PIG	LOX
Other	Adult	A0A287AUN4_PIG	VAMP5
Other	Adult	I3LUR7_PIG	COL6A3
Other	Adult	I3LQ84_PIG	COL6A2
Other	Adult	G8GCE6_PIG	CAV2
Other	Adult	B9ZSM8_PIG	CD90
Other	Adult	K7GP66_PIG	ITGB4
Other	Adult	F1SR53_PIG	ITGA5
Other	Adult	F1S1B2_PIG	MPZ
Other	Adult	F1RGY5_PIG	NID1
Other	Adult	I3LSV6_PIG	COL2A1
Other	Adult	PLAK_PIG	Jup
Other	Adult	A7WLI1_PIG	CD81
Other	Adult	F1SN69_PIG	COL27A1
Other	Adult	F1SUX4_PIG	NUMA1
Other	Adult	F1SFA7_PIG	COL1A2

## Sheet: molecular function 
Category	Sample resourse	UniProtKB entry name	Gene symbol
Antioxidant Activity	Young	A0A0K1TQQ0_PIG	MGST2
Antioxidant Activity	Young	F1RSB4_PIG	EPX
Antioxidant Activity	Adult	F1RSB4_PIG	EPX
Binding	Young	F1RSB4_PIG	EPX
Binding	Young	F1SLE7_PIG	DYSF
Binding	Young	RACK1_PIG	RACK1
Binding	Young	F1SJM4_PIG	MME
Binding	Young	B9ZSM8_PIG	CD90
Binding	Young	K7GP66_PIG	ITGB4
Binding	Young	A0A287A9D0_PIG	PTPRC
Binding	Young	A0A287BJK5_PIG	PLPP3
Binding	Young	F1SDX6_PIG	TGM2
Binding	Young	EGLN_PIG	ENG
Binding	Young	ADA10_PIG	ADAM10
Binding	Young	F1SHN1_PIG	CNTN1
Binding	Young	F1SM35_PIG	ATP8B1
Binding	Young	F1S829_PIG	WLS
Binding	Young	F1RWT7_PIG	AMOT
Binding	Young	I3LQN4_PIG	PHB2
Binding	Young	A0A287A1S6_PIG	COL1A1
Binding	Young	I3L781_PIG	COL1A2
Binding	Young	F1RYI8_PIG	COL3A1
Binding	Young	A0A287AXU0_PIG	ELN
Binding	Young	F1RKK1_PIG	FBN2
Binding	Young	F1RZM4_PIG	LAMA4
Binding	Young	A0A287BF88_PIG	COL5A2
Binding	Young	F1SUE4_PIG	ASPN
Binding	Young	I3LGD9_PIG	AGRN
Binding	Young	F1SPT5_PIG	LAMB2
Binding	Young	VDAC1_PIG	VDAC1
Binding	Young	K7GS94_PIG	ITGB1
Binding	Young	ATPA_PIG	ATP5F1A
Binding	Young	DPP4_PIG	DPP4
Binding	Young	F2Z543_PIG	PHB
Binding	Young	A0A287BRP6_PIG	ERLIN2
Binding	Young	CAV1_PIG	CAV1
Binding	Young	ACTB_PIG	ACTB
Binding	Young	K9J6J2_PIG	STOM_tv1
Binding	Young	DPEP1_PIG	DPEP1
Binding	Young	F1S2B6_PIG	BGN
Binding	Young	RS3_PIG	RPS3
Binding	Young	A0A287ALN1_PIG	NID2
Binding	Young	F1RN44_PIG	LAMP1
Binding	Young	A7WLI1_PIG	CD81
Binding	Young	A0A286ZV95_PIG	TMED10
Binding	Young	CD59_PIG	CD59
Binding	Young	A8DSD5_PIG	ITGB2
Binding	Young	F1SMF4_PIG	ITGA2
Binding	Young	AMPE_PIG	ENPEP
Binding	Young	F2Z5K3_PIG	RAP1A
Binding	Young	K7GRJ7_PIG	ATP2B3
Binding	Young	Q56P20_PIG	ARF4
Binding	Young	F1SB90_PIG	GNAI1
Binding	Young	F1S3D5_PIG	LMAN2
Binding	Young	F1RZR0_PIG	ITPR3
Binding	Young	F1SRM1_PIG	MYO10
Binding	Young	A0A2C9F366_PIG	HSPB1
Binding	Young	F1RIR2_PIG	STX4
Binding	Young	F1S1D6_PIG	ATP6V0A1
Binding	Young	F1RYZ1_PIG	CD151
Binding	Young	F1RNA6_PIG	FLOT2
Binding	Young	AT1B1_PIG	ATP1B1
Binding	Young	F1RK12_PIG	ITM2B
Binding	Young	F1S1C3_PIG	CA4
Binding	Young	A5GFS1_PIG	ATP9A
Binding	Young	K7GS03_PIG	LRP1
Binding	Young	F1RX37_PIG	FGB
Binding	Young	SCRB1_PIG	SCARB1
Binding	Young	K7GN08_PIG	L1CAM
Binding	Young	F1SEQ6_PIG	TSPAN14
Binding	Young	A0A287AHK8_PIG	SNAP23
Binding	Young	FBN1_PIG	FBN1
Binding	Young	I3LL32_PIG	CHIA
Binding	Young	F1SVA2_PIG	TINAGL1
Binding	Young	F1SQ10_PIG	DCN
Binding	Young	I3LJY8_PIG	HSD17B12
Binding	Young	F1RX36_PIG	FGA
Binding	Young	F1SBB3_PIG	LAMA3
Binding	Young	F1SFJ8_PIG	DNAJB11
Binding	Young	GLUC_PIG	GCG
Binding	Young	F1SQ09_PIG	LUM
Binding	Young	F1SKC7_PIG	CPB1
Binding	Young	CBPA1_PIG	CPA1
Binding	Young	I3LTE1_PIG	CPM
Binding	Young	F1SU03_PIG	HSPG2
Binding	Young	F1S6B4_PIG	PRELP
Binding	Young	F8SIP2_PIG	EFEMP1
Binding	Young	F1SBE5_PIG	PTGIS
Binding	Young	K7GT68_PIG	ITGA6
Binding	Young	F1SGT4_PIG	CD44
Binding	Young	A0A287A649_PIG	EMP2
Binding	Young	A0A287A905_PIG	ANO6
Binding	Young	ARF6_PIG	ARF6
Binding	Young	F1RW75_PIG	DSP
Binding	Young	A0A286ZV23_PIG	EGFR
Binding	Young	A0A287BIL8_PIG	HSPA5
Binding	Young	CDC42_PIG	CDC42
Binding	Young	A0A287AU52_PIG	NPNT
Binding	Young	A0A286ZWS8_PIG	COL2A1
Binding	Young	F1RLC4_PIG	LOX
Binding	Young	I3L719_PIG	DPEP1
Binding	Young	Q06AS6_PIG	GNAI2
Binding	Young	K7GQN2_PIG	FAP
Binding	Young	C4MXZ1_PIG	ARF1
Binding	Young	F1SR53_PIG	ITGA5
Binding	Young	F1SS24_PIG	FN1
Binding	Young	B2ZI35_PIG	F11R
Binding	Young	F1RYT3_PIG	SCARB2
Binding	Young	F2Z5F2_PIG	RAB10
Binding	Young	A0A286ZSD7_PIG	STOML2
Binding	Young	XPP2_PIG	XPNPEP2
Binding	Young	FOLH1_PIG	FOLH1
Binding	Young	F1S091_PIG	RAB8B
Binding	Young	Q95JH1_PIG	CD61
Binding	Young	F1SB67_PIG	IGF2R
Binding	Young	F1SBB5_PIG	NPC1
Binding	Young	F1SD42_PIG	ADGRE5
Binding	Young	I3LKU0_PIG	RAC2
Binding	Young	G9F6X8_PIG	P4HB
Binding	Young	CY24B_PIG	CYBB
Binding	Young	F2Z5K4_PIG	RHOC
Binding	Young	HS90A_PIG	HSP90AA1
Binding	Young	AT2B1_PIG	ATP2B1
Binding	Young	F1SMF6_PIG	ITGA1
Binding	Young	C0MHR2_PIG	CLTC
Binding	Young	PLAK_PIG	Jup
Binding	Young	I3LBB2_PIG	VPS35
Binding	Young	F1S3P8_PIG	STX7
Binding	Young	K7GSR6_PIG	NT5E
Binding	Young	F1RFL9_PIG	ATP6V0A2
Binding	Young	A0A287AYL9_PIG	NSF
Binding	Young	GNA11_PIG	GNA11
Binding	Young	I3L6W6_PIG	DNAJC1
Binding	Young	F1RPZ7_PIG	RHAG
Binding	Young	F1RYM5_PIG	SPPL2A
Binding	Young	C6EVT4_PIG	CDH1
Binding	Young	F1RVP8_PIG	TCIRG1
Binding	Young	GTR1_PIG	SLC2A1
Binding	Young	COF1_PIG	CFL1
Binding	Young	F1S2A8_PIG	BCAP31
Binding	Young	F1RFQ6_PIG	STX2
Binding	Young	F1RQZ0_PIG	GRN
Binding	Young	ANXA4_PIG	ANXA4
Binding	Young	A0A286ZVL0_PIG	HNRNPU
Binding	Young	RADI_PIG	RDX
Binding	Young	PA21B_PIG	PLA2G1B
Binding	Young	F1RGY5_PIG	NID1
Binding	Young	A0A286ZRU9_PIG	SERPINH1
Binding	Young	PRP_PIG	LOC102162895
Binding	Young	F1SA65_PIG	FBN3
Binding	Young	CAP7_PIG	AZU1
Binding	Young	Q6QR67_PIG	RETN
Binding	Young	PGS2_PIG	DCN
Binding	Young	C3S7K6_PIG	S100A9
Binding	Young	F1S4T6_PIG	PNLIPRP2
Binding	Young	I3LMK2_PIG	TFF2
Binding	Young	F1SD87_PIG	FBLN5
Binding	Young	F1RUC0_PIG	LAMP2
Binding	Young	F1RJ50_PIG	LOC100517891
Binding	Young	A0A287A504_PIG	LOC100621421
Binding	Young	A0A287BD93_PIG	CNP
Binding	Young	A0A287ALW2_PIG	CXADR
Binding	Young	F1SP85_PIG	TEK
Binding	Young	DMBT1_PIG	DMBT1
Binding	Young	AT1A1_PIG	ATP1A1
Binding	Young	K7GMF9_PIG	ANPEP
Binding	Young	B9V4F0_PIG	ARF5
Binding	Young	CAV2_PIG	CAV2
Binding	Young	F1SIC6_PIG	CD276
Binding	Young	I3L9I6_PIG	BCAM
Binding	Young	F1RX35_PIG	FGG
Binding	Young	F1RKY1_PIG	SNAP29
Binding	Young	K7GR72_PIG	SLC4A1
Binding	Young	A0A287BCL8_PIG	SPPL2B
Binding	Young	F4ZS19_PIG	PLSCR1
Binding	Young	I3LIX4_PIG	STK39
Binding	Young	K7GR16_PIG	KIRREL1
Binding	Young	F1RW46_PIG	SYP
Binding	Young	F1S4T9_PIG	PNLIP
Binding	Young	BGH3_PIG	TGFBI
Binding	Young	F6Q1W0_PIG	PNLIPRP1
Binding	Young	F1S3G7_PIG	COL5A3
Binding	Young	F1SKM1_PIG	COL7A1
Binding	Young	AMYP_PIG	AMY2
Binding	Young	CO3_PIG	C3
Binding	Young	F1S0M0_PIG	MATN2
Binding	Young	F1SAE9_PIG	LAMB1
Binding	Young	F1RGA3_PIG	STX1A
Binding	Young	TFF2_PIG	TFF2
Binding	Adult	K7GS94_PIG	ITGB1
Binding	Adult	K9J6J2_PIG	STOM_tv1
Binding	Adult	F1RQZ0_PIG	GRN
Binding	Adult	A0A287AHK8_PIG	SNAP23
Binding	Adult	CD59_PIG	CD59
Binding	Adult	CAV1_PIG	CAV1
Binding	Adult	F1S2B6_PIG	BGN
Binding	Adult	K7GS03_PIG	LRP1
Binding	Adult	Q95JH1_PIG	CD61
Binding	Adult	VDAC1_PIG	VDAC1
Binding	Adult	AMPE_PIG	ENPEP
Binding	Adult	PA21B_PIG	PLA2G1B
Binding	Adult	I3L781_PIG	COL1A2
Binding	Adult	A0A287A1S6_PIG	COL1A1
Binding	Adult	FBN1_PIG	FBN1
Binding	Adult	I3LL32_PIG	CHIA
Binding	Adult	A0A287BF88_PIG	COL5A2
Binding	Adult	F1RYI8_PIG	COL3A1
Binding	Adult	F1S4T9_PIG	PNLIP
Binding	Adult	A0A286ZWS8_PIG	COL2A1
Binding	Adult	F1S4T6_PIG	PNLIPRP2
Binding	Adult	F1RLC4_PIG	LOX
Binding	Adult	F1SQ10_PIG	DCN
Binding	Adult	F1RXR2_PIG	CRELD2
Binding	Adult	F1S3G7_PIG	COL5A3
Binding	Adult	I3LMK2_PIG	TFF2
Binding	Adult	F1SU03_PIG	HSPG2
Binding	Adult	F1RSB4_PIG	EPX
Binding	Adult	B9ZSM8_PIG	CD90
Binding	Adult	F1S1C3_PIG	CA4
Binding	Adult	F1RN44_PIG	LAMP1
Binding	Adult	A0A287BRP6_PIG	ERLIN2
Binding	Adult	ADA10_PIG	ADAM10
Binding	Adult	F1RPA9_PIG	UMOD
Binding	Adult	A0A287BJK5_PIG	PLPP3
Binding	Adult	K7GP66_PIG	ITGB4
Binding	Adult	F1SMF6_PIG	ITGA1
Binding	Adult	A0A287ALN1_PIG	NID2
Binding	Adult	F1SR53_PIG	ITGA5
Binding	Adult	F1SMF4_PIG	ITGA2
Binding	Adult	PGS2_PIG	DCN
Binding	Adult	F1SVA2_PIG	TINAGL1
Binding	Adult	F1RKK1_PIG	FBN2
Binding	Adult	F1RGY5_PIG	NID1
Binding	Adult	F1S6B4_PIG	PRELP
Binding	Adult	PLAK_PIG	Jup
Binding	Adult	A7WLI1_PIG	CD81
Binding	Adult	F1SUX4_PIG	NUMA1
Binding	Adult	F1S0Y1_PIG	HMCN2

## Sheet: cellular component 
Category	Sample resourse	UniProtKB entry name	Gene symbol
Endosome	Young	F1SLE7_PIG	DYSF
Endosome	Young	CAV1_PIG	CAV1
Endosome	Young	F1RNA6_PIG	FLOT2
Endosome	Young	F1RWT7_PIG	AMOT
Endosome	Young	F2Z543_PIG	PHB
Endosome	Young	F1S5Z2_PIG	KIAA1324
Endosome	Young	A0A287AUN4_PIG	VAMP5
Endosome	Young	DPP4_PIG	DPP4
Endosome	Young	F1S829_PIG	WLS
Endosome	Young	F2Z5H6_PIG	ATP6V0D1
Endosome	Young	F1RN44_PIG	LAMP1
Endosome	Young	A5GFS1_PIG	ATP9A
Endosome	Young	K7GS03_PIG	LRP1
Endosome	Young	FLOT1_PIG	FLOT1
Endosome	Young	A0A286ZV23_PIG	EGFR
Endosome	Young	CDC42_PIG	CDC42
Endosome	Young	I3LBB2_PIG	VPS35
Endosome	Young	ARF6_PIG	ARF6
Endosome	Young	F2Z5F2_PIG	RAB10
Endosome	Young	F1S091_PIG	RAB8B
Endosome	Young	F1SBB5_PIG	NPC1
Endosome	Young	F1S3P8_PIG	STX7
Endosome	Young	F1RUC0_PIG	LAMP2
Endosome	Young	C0MHR2_PIG	CLTC
Endosome	Young	F1SPK8_PIG	CD63
Endosome	Young	F1RYT3_PIG	SCARB2
Endosome	Young	F1SB67_PIG	IGF2R
Endosome	Young	F1RYM5_PIG	SPPL2A
Endosome	Young	F1RQZ0_PIG	GRN
Endosome	Young	A0A287BCL8_PIG	SPPL2B
Endosome	Young	F1SN90_PIG	SLC31A2
Endosome	Adult	CAV1_PIG	CAV1
Endosome	Adult	A0A287AUN4_PIG	VAMP5
Endosome	Adult	F1RQZ0_PIG	GRN
Endosome	Adult	K7GS03_PIG	LRP1
Endosome	Adult	F1RN44_PIG	LAMP1
Endosome	Adult
Plasma membrane	Young	F1SLE7_PIG	DYSF
Plasma membrane	Young	CAV1_PIG	CAV1
Plasma membrane	Young	F1RNA6_PIG	FLOT2
Plasma membrane	Young	F1RWT7_PIG	AMOT
Plasma membrane	Young	F2Z543_PIG	PHB
Plasma membrane	Young	F1S5Z2_PIG	KIAA1324
Plasma membrane	Young	A0A287AUN4_PIG	VAMP5
Plasma membrane	Young	DPP4_PIG	DPP4
Plasma membrane	Young	F1S829_PIG	WLS
Plasma membrane	Young	F2Z5H6_PIG	ATP6V0D1
Plasma membrane	Young	F1RN44_PIG	LAMP1
Plasma membrane	Young	A5GFS1_PIG	ATP9A
Plasma membrane	Young	K7GS03_PIG	LRP1
Plasma membrane	Young	FLOT1_PIG	FLOT1
Plasma membrane	Young	B9ZSM8_PIG	CD90
Plasma membrane	Young	K7GP66_PIG	ITGB4
Plasma membrane	Young	A0A287A9D0_PIG	PTPRC
Plasma membrane	Young	F1SM35_PIG	ATP8B1
Plasma membrane	Young	RS3_PIG	RPS3
Plasma membrane	Young	AT1B1_PIG	ATP1B1
Plasma membrane	Young	SCRB1_PIG	SCARB1
Plasma membrane	Young	F1RX37_PIG	FGB
Plasma membrane	Young	RACK1_PIG	RACK1
Plasma membrane	Young	AQP1_PIG	AQP1
Plasma membrane	Young	F1SHN1_PIG	CNTN1
Plasma membrane	Young	I3LGD9_PIG	AGRN
Plasma membrane	Young	A7WLI1_PIG	CD81
Plasma membrane	Young	A0A286ZV95_PIG	TMED10
Plasma membrane	Young	AMPE_PIG	ENPEP
Plasma membrane	Young	Q56P20_PIG	ARF4
Plasma membrane	Young	F1RIR2_PIG	STX4
Plasma membrane	Young	A0A286ZSI3_PIG	NCSTN
Plasma membrane	Young	K9J6J2_PIG	STOM_tv1
Plasma membrane	Young	F1S3D5_PIG	LMAN2
Plasma membrane	Young	F1SEQ6_PIG	TSPAN14
Plasma membrane	Young	F1SML5_PIG	LRRC4
Plasma membrane	Young	K7GN08_PIG	L1CAM
Plasma membrane	Young	F1S1B2_PIG	MPZ
Plasma membrane	Young	I3LUR7_PIG	COL6A3
Plasma membrane	Young	I3LQ84_PIG	COL6A2
Plasma membrane	Young	G8GCE6_PIG	CAV2
Plasma membrane	Young	F1RM08_PIG	SLC1A5
Plasma membrane	Young	A0A287BJK5_PIG	PLPP3
Plasma membrane	Young	F1SDX6_PIG	TGM2
Plasma membrane	Young	ADA10_PIG	ADAM10
Plasma membrane	Young	EGLN_PIG	ENG
Plasma membrane	Young	K7GS94_PIG	ITGB1
Plasma membrane	Young	A8DSD5_PIG	ITGB2
Plasma membrane	Young	F1SMF4_PIG	ITGA2
Plasma membrane	Young	F1SRM1_PIG	MYO10
Plasma membrane	Young	CD47_PIG	CD47
Plasma membrane	Young	A4USB0_PIG	ITGAV
Plasma membrane	Young	A8DNU5_PIG	ITGAL
Plasma membrane	Young	A0A287BRP6_PIG	ERLIN2
Plasma membrane	Young	ACTB_PIG	ACTB
Plasma membrane	Young	DPEP1_PIG	DPEP1
Plasma membrane	Young	F2Z5K3_PIG	RAP1A
Plasma membrane	Young	A0A2C9F366_PIG	HSPB1
Plasma membrane	Young	F1RYZ1_PIG	CD151
Plasma membrane	Young	CD59_PIG	CD59
Plasma membrane	Young	F1SB90_PIG	GNAI1
Plasma membrane	Young	F1RZR0_PIG	ITPR3
Plasma membrane	Young	F1S1D6_PIG	ATP6V0A1
Plasma membrane	Young	F1RK12_PIG	ITM2B
Plasma membrane	Young	A0A287AHK8_PIG	SNAP23
Plasma membrane	Young	C3VML0_PIG	CLDN4
Plasma membrane	Young	A0A286ZI26_PIG	PLGRKT
Plasma membrane	Young	S4A4_PIG	SLC4A4
Plasma membrane	Young	F1SJM4_PIG	MME
Plasma membrane	Young	A0A287ALN1_PIG	NID2
Plasma membrane	Young	VDAC1_PIG	VDAC1
Plasma membrane	Young	ATPA_PIG	ATP5F1A
Plasma membrane	Young	F1S2B6_PIG	BGN
Plasma membrane	Young	A0A0K1TQQ0_PIG	MGST2
Plasma membrane	Young	I3LJB6_PIG	SACM1L
Plasma membrane	Young	K7GRJ7_PIG	ATP2B3
Plasma membrane	Young	F1S1C3_PIG	CA4
Plasma membrane	Young	Q8SPA1_PIG	SLA-DQB
Plasma membrane	Young	A7XP04_PIG	SLA-DRB1
Plasma membrane	Young	A0A172Q3W6_PIG	SLA-DQA
Plasma membrane	Young	Q31064_PIG	SLA-DR-alpha
Plasma membrane	Young	A0A0A7C0G6_PIG	SLA-2
Plasma membrane	Young	F1RSZ8_PIG	ENPP6
Plasma membrane	Young	Q8HX68_PIG	SLA-1
Plasma membrane	Young	L7WHJ6_PIG	SLA-1
Plasma membrane	Young	Q0MRZ9_PIG	SLA
Plasma membrane	Young	Q8SPB3_PIG	SLA-B
Plasma membrane	Young	A0A286ZV23_PIG	EGFR
Plasma membrane	Young	CDC42_PIG	CDC42
Plasma membrane	Young	I3LBB2_PIG	VPS35
Plasma membrane	Young	ARF6_PIG	ARF6
Plasma membrane	Young	F2Z5F2_PIG	RAB10
Plasma membrane	Young	F1S091_PIG	RAB8B
Plasma membrane	Young	F1SBB5_PIG	NPC1
Plasma membrane	Young	F1S3P8_PIG	STX7
Plasma membrane	Young	C0MHR2_PIG	CLTC
Plasma membrane	Young	F1SPK8_PIG	CD63
Plasma membrane	Young	F1RYT3_PIG	SCARB2
Plasma membrane	Young	F1SB67_PIG	IGF2R
Plasma membrane	Young	F1RYM5_PIG	SPPL2A
Plasma membrane	Young	F1RQZ0_PIG	GRN
Plasma membrane	Young	K7GT68_PIG	ITGA6
Plasma membrane	Young	A0A287A649_PIG	EMP2
Plasma membrane	Young	F1RW75_PIG	DSP
Plasma membrane	Young	A0A287AU52_PIG	NPNT
Plasma membrane	Young	F1SR53_PIG	ITGA5
Plasma membrane	Young	F1SS24_PIG	FN1
Plasma membrane	Young	B2ZI35_PIG	F11R
Plasma membrane	Young	A0A286ZSD7_PIG	STOML2
Plasma membrane	Young	Q95JH1_PIG	CD61
Plasma membrane	Young	I3LKU0_PIG	RAC2
Plasma membrane	Young	F1RFQ6_PIG	STX2
Plasma membrane	Young	PLAK_PIG	Jup
Plasma membrane	Young	A0A287A905_PIG	ANO6
Plasma membrane	Young	F1S455_PIG	TMEM231
Plasma membrane	Young	Q06AS6_PIG	GNAI2
Plasma membrane	Young	K7GQN2_PIG	FAP
Plasma membrane	Young	F2Z5K4_PIG	RHOC
Plasma membrane	Young	A0A287AYL9_PIG	NSF
Plasma membrane	Young	COF1_PIG	CFL1
Plasma membrane	Young	F1SM72_PIG	NCAM1
Plasma membrane	Young	A0A287BHK8_PIG	ADAM22
Plasma membrane	Young	GTR1_PIG	SLC2A1
Plasma membrane	Young	F1SGT4_PIG	CD44
Plasma membrane	Young	K7GSR6_PIG	NT5E
Plasma membrane	Young	F1S2A8_PIG	BCAP31
Plasma membrane	Young	G3FNU5_PIG	ITGB5
Plasma membrane	Young	K7GN83_PIG	BST1
Plasma membrane	Young	F1SBE5_PIG	PTGIS
Plasma membrane	Young	A0A287BIL8_PIG	HSPA5
Plasma membrane	Young	I3L719_PIG	DPEP1
Plasma membrane	Young	G9F6X8_PIG	P4HB
Plasma membrane	Young	CY24B_PIG	CYBB
Plasma membrane	Young	HS90A_PIG	HSP90AA1
Plasma membrane	Young	F1SMF6_PIG	ITGA1
Plasma membrane	Young	F1RFL9_PIG	ATP6V0A2
Plasma membrane	Young	I3L6W6_PIG	DNAJC1
Plasma membrane	Young	F1RVP8_PIG	TCIRG1
Plasma membrane	Young	ANXA4_PIG	ANXA4
Plasma membrane	Young	I3L8R2_PIG	APH1A
Plasma membrane	Young	F1SGJ4_PIG	ABHD6
Plasma membrane	Young	F1SD42_PIG	ADGRE5
Plasma membrane	Young	AT2B1_PIG	ATP2B1
Plasma membrane	Young	GNA11_PIG	GNA11
Plasma membrane	Young	F1RPZ7_PIG	RHAG
Plasma membrane	Young	PRAF3_PIG	ARL6IP5
Plasma membrane	Young	A0A287A5T0_PIG	TMEM30A
Plasma membrane	Young	TSN9_PIG	TSPAN9
Plasma membrane	Young	CML1_PIG	CMLKR1
Plasma membrane	Young	C6EVT4_PIG	CDH1
Plasma membrane	Young	PECA1_PIG	PECAM1
Plasma membrane	Young	F1SLL5_PIG	PLPP1
Plasma membrane	Young	F1S8P1_PIG	SCCPDH
Plasma membrane	Young	F1RSY4_PIG	SMPD2
Plasma membrane	Young	F1RF26_PIG	SERINC5
Plasma membrane	Young	C4MXZ1_PIG	ARF1
Plasma membrane	Young	XPP2_PIG	XPNPEP2
Plasma membrane	Young	FOLH1_PIG	FOLH1
Plasma membrane	Young	Q8MGP9_PIG	SLA-DQB
Plasma membrane	Young	A0A0A7BZH1_PIG	SLA-DQB1
Plasma membrane	Young	Q4ZJG0_PIG	SLA-DQA
Plasma membrane	Young	Q8MGW9_PIG	SLA-DRB
Plasma membrane	Young	A0A0A7C0G4_PIG	SLA-1
Plasma membrane	Young	B6ICW9_PIG	SLA-11
Plasma membrane	Young	Q9TVD7_PIG	SLA-DQB*G05
Plasma membrane	Young	F1S8P6_PIG	MFSD10
Plasma membrane	Young	I3LQM7_PIG	SLC38A5
Plasma membrane	Young	F1SRD2_PIG	ANO10
Plasma membrane	Young	Q2QEH5_PIG	SLCO2A1
Plasma membrane	Young	C163A_PIG	CD163
Plasma membrane	Young	C3VPJ4_PIG	CLDN7
Plasma membrane	Young	B2MG_PIG	B2M
Plasma membrane	Young	A5D9L3_PIG	SLA-DMB
Plasma membrane	Young	A0A286ZR24_PIG	LOC100621657
Plasma membrane	Young	COPB_PIG	COPB1
Plasma membrane	Young	A0A287BCL8_PIG	SPPL2B
Plasma membrane	Young	F1SN90_PIG	SLC31A2
Plasma membrane	Young	A0A287ALW2_PIG	CXADR
Plasma membrane	Young	F1RX35_PIG	FGG
Plasma membrane	Young	F1SP85_PIG	TEK
Plasma membrane	Young	CAV2_PIG	CAV2
Plasma membrane	Young	F1RKY1_PIG	SNAP29
Plasma membrane	Young	K7GR16_PIG	KIRREL1
Plasma membrane	Young	AT1A1_PIG	ATP1A1
Plasma membrane	Young	F4ZS19_PIG	PLSCR1
Plasma membrane	Young	I3LIX4_PIG	STK39
Plasma membrane	Young	F1RW46_PIG	SYP
Plasma membrane	Young	A0A287B843_PIG	CACNA2D1
Plasma membrane	Young	C3VML1_PIG	CLDN5
Plasma membrane	Young	F1SIC6_PIG	CD276
Plasma membrane	Young	A0A287A462_PIG	GNG10
Plasma membrane	Young	I3L9I6_PIG	BCAM
Plasma membrane	Young	DMBT1_PIG	DMBT1
Plasma membrane	Young	K7GMF9_PIG	ANPEP
Plasma membrane	Young	B9V4F0_PIG	ARF5
Plasma membrane	Young	K7GR72_PIG	SLC4A1
Plasma membrane	Young	O19240_PIG	PA14
Plasma membrane	Young	A0A0N9E903_PIG	SLA-1
Plasma membrane	Young	A0A172Q3Y5_PIG	SLA-DQA
Plasma membrane	Young	B1PJV4_PIG	SLA-1
Plasma membrane	Young	A0A287B5A2_PIG	ATP1B3
Plasma membrane	Young	C3VPJ5_PIG	CLDN3
Plasma membrane	Young	A0A287AE03_PIG	SLC29A1
Plasma membrane	Young	A0SEG9_PIG	C9
Plasma membrane	Young	F1RGA3_PIG	STX1A
Plasma membrane	Young	B1A9N2_PIG	SLA-DRB1
Plasma membrane	Young	V9PQW0_PIG	SLA-DQB1
Plasma membrane	Young	B1A9M5_PIG	SLA-DQB1
Plasma membrane	Young	Q6Y1I7_PIG	SLA-DRB
Plasma membrane	Young	Q8MHS9_PIG	SLA-DQB
Plasma membrane	Young	Q8MGX1_PIG	SLA-DQB
Plasma membrane	Young	Q860P3_PIG	SLA-DRB
Plasma membrane	Young	Q7YNW7_PIG	SLA-DRA1
Plasma membrane	Young	Q2PT69_PIG	SLA-2
Plasma membrane	Young	B1A9N7_PIG	SLA-2
Plasma membrane	Young	Q8MHT8_PIG	SLA-3
Plasma membrane	Young	A0A1C9J6F0_PIG	SLA-2
Plasma membrane	Young	A0A0A7BZF2_PIG	SLA-1
Plasma membrane	Young	Q5DM15_PIG	SLA-DQB
Plasma membrane	Adult	CAV1_PIG	CAV1
Plasma membrane	Adult	A0A287AUN4_PIG	VAMP5
Plasma membrane	Adult	F1RQZ0_PIG	GRN
Plasma membrane	Adult	K7GS03_PIG	LRP1
Plasma membrane	Adult	Q95JH1_PIG	CD61
Plasma membrane	Adult	AMPE_PIG	ENPEP
Plasma membrane	Adult	K9J6J2_PIG	STOM_tv1
Plasma membrane	Adult	I3LUR7_PIG	COL6A3
Plasma membrane	Adult	I3LQ84_PIG	COL6A2
Plasma membrane	Adult	G8GCE6_PIG	CAV2
Plasma membrane	Adult	K7GS94_PIG	ITGB1
Plasma membrane	Adult	A0A287AHK8_PIG	SNAP23
Plasma membrane	Adult	CD59_PIG	CD59
Plasma membrane	Adult	F1S2B6_PIG	BGN
Plasma membrane	Adult	VDAC1_PIG	VDAC1
Plasma membrane	Adult	I6W9Q3_PIG	SLA-1
Plasma membrane	Adult	Q8SPC4_PIG	SLA-DQB
Plasma membrane	Adult	Q6Y1I7_PIG	SLA-DRB
Plasma membrane	Adult	Q31064_PIG	SLA-DR-alpha
Plasma membrane	Adult	Q8SPB5_PIG	SLA-DQB
Plasma membrane	Adult	Q8SPA1_PIG	SLA-DQB
Plasma membrane	Adult	A0A172Q3W6_PIG	SLA-DQA
Plasma membrane	Adult	A0A172Q3Y5_PIG	SLA-DQA
Plasma membrane	Adult	A0A0N9JNW5_PIG	SLA-2
Plasma membrane	Adult	L7WPB3_PIG	SLA-1
Plasma membrane	Adult	D6C4F4_PIG	SLA-1
Plasma membrane	Adult	B2MG_PIG	B2M
Plasma membrane	Adult	F1RN44_PIG	LAMP1
Plasma membrane	Adult	B9ZSM8_PIG	CD90
Plasma membrane	Adult	K7GP66_PIG	ITGB4
Plasma membrane	Adult	F1SR53_PIG	ITGA5
Plasma membrane	Adult	F1S1B2_PIG	MPZ
Plasma membrane	Adult	ADA10_PIG	ADAM10
Plasma membrane	Adult	F1RPA9_PIG	UMOD
Plasma membrane	Adult	A0A287BJK5_PIG	PLPP3
Plasma membrane	Adult	F1SMF4_PIG	ITGA2
Plasma membrane	Adult	A0A287BRP6_PIG	ERLIN2
Plasma membrane	Adult	F1SMF6_PIG	ITGA1
Plasma membrane	Adult	A0A287ALN1_PIG	NID2
Plasma membrane	Adult	F1SLL5_PIG	PLPP1
Plasma membrane	Adult	F1S1C3_PIG	CA4
Plasma membrane	Adult	Q860U2_PIG	SLA-DQB1
Plasma membrane	Adult	Q860P3_PIG	SLA-DRB
Plasma membrane	Adult	A0A0A7BZS1_PIG	SLA-2
Plasma membrane	Adult	L7WHJ6_PIG	SLA-1
Plasma membrane	Adult	Q0GA96_PIG	SLA-DQA
Plasma membrane	Adult	F1RSZ8_PIG	ENPP6
Plasma membrane	Adult	PLAK_PIG	Jup
Plasma membrane	Adult	A7WLI1_PIG	CD81
Plasma membrane	Adult	Q8MGQ2_PIG	SLA-DRB
Plasma membrane	Adult	Q8MGP9_PIG	SLA-DQB
Plasma membrane	Adult	Q8MHU4_PIG	SLA-B
Plasma membrane	Adult	F1SUX4_PIG	NUMA1
Plasma membrane	Adult	B1PJU8_PIG	SLA-1
Plasma membrane	Adult	A0A0A7BZF2_PIG	SLA-1
Plasma membrane	Adult
Extracellular	Young	DPP4_PIG	DPP4
Extracellular	Young	F1RX37_PIG	FGB
Extracellular	Young	I3LGD9_PIG	AGRN
Extracellular	Young	A7WLI1_PIG	CD81
Extracellular	Young	F1S3D5_PIG	LMAN2
Extracellular	Young	I3LUR7_PIG	COL6A3
Extracellular	Young	I3LQ84_PIG	COL6A2
Extracellular	Young	CD47_PIG	CD47
Extracellular	Young	DPEP1_PIG	DPEP1
Extracellular	Young	F1RYZ1_PIG	CD151
Extracellular	Young	F1RK12_PIG	ITM2B
Extracellular	Young	A0A287ALN1_PIG	NID2
Extracellular	Young	F1S2B6_PIG	BGN
Extracellular	Young	F1S1C3_PIG	CA4
Extracellular	Young	F1RSZ8_PIG	ENPP6
Extracellular	Young	A0A287A1S6_PIG	COL1A1
Extracellular	Young	F1RYI8_PIG	COL3A1
Extracellular	Young	F1SAE9_PIG	LAMB1
Extracellular	Young	F1SQ09_PIG	LUM
Extracellular	Young	I3L781_PIG	COL1A2
Extracellular	Young	A0A287BF88_PIG	COL5A2
Extracellular	Young	A0A287AXU0_PIG	ELN
Extracellular	Young	F1RLL9_PIG	COL4A2
Extracellular	Young	F1RX36_PIG	FGA
Extracellular	Young	F1SPT5_PIG	LAMB2
Extracellular	Young	F1S663_PIG	LAMC1
Extracellular	Young	I3LJY8_PIG	HSD17B12
Extracellular	Young	I3LSV6_PIG	COL2A1
Extracellular	Young	F1RQI0_PIG	COL12A1
Extracellular	Young	F1SFA7_PIG	COL1A2
Extracellular	Young	F1RZM4_PIG	LAMA4
Extracellular	Young	F1SBB3_PIG	LAMA3
Extracellular	Young	I3LL32_PIG	CHIA
Extracellular	Young	F1RKK1_PIG	FBN2
Extracellular	Young	F1SUE4_PIG	ASPN
Extracellular	Young	F1RSB4_PIG	EPX
Extracellular	Young	F1SQ10_PIG	DCN
Extracellular	Young	F1SFJ8_PIG	DNAJB11
Extracellular	Young	FBN1_PIG	FBN1
Extracellular	Young	GLUC_PIG	GCG
Extracellular	Young	F1SCD0_PIG	LOC100153899
Extracellular	Young	I3LQZ3_PIG	MUC6
Extracellular	Young	F1SCC7_PIG	LOC396684
Extracellular	Young	Q9GMA6_PIG	SERPINA3-2
Extracellular	Young	F1SVA2_PIG	TINAGL1
Extracellular	Young	I3LTE1_PIG	CPM
Extracellular	Young	F1SKC7_PIG	CPB1
Extracellular	Young	CBPA1_PIG	CPA1
Extracellular	Young	F1RPA7_PIG	GP2
Extracellular	Young	A0A287A0A6_PIG	COL6A6
Extracellular	Young	F1SBB5_PIG	NPC1
Extracellular	Young	F1SPK8_PIG	CD63
Extracellular	Young	F1RQZ0_PIG	GRN
Extracellular	Young	K7GT68_PIG	ITGA6
Extracellular	Young	A0A287AU52_PIG	NPNT
Extracellular	Young	F1SS24_PIG	FN1
Extracellular	Young	K7GQN2_PIG	FAP
Extracellular	Young	F1SBE5_PIG	PTGIS
Extracellular	Young	C163A_PIG	CD163
Extracellular	Young	B2MG_PIG	B2M
Extracellular	Young	F1RUC0_PIG	LAMP2
Extracellular	Young	A0A286ZWS8_PIG	COL2A1
Extracellular	Young	F1SD87_PIG	FBLN5
Extracellular	Young	F1SKX7_PIG	COL8A1
Extracellular	Young	F1RGY5_PIG	NID1
Extracellular	Young	F1RLC4_PIG	LOX
Extracellular	Young	A0A286ZRU9_PIG	SERPINH1
Extracellular	Young	A0A287BD93_PIG	CNP
Extracellular	Young	F1SN69_PIG	COL27A1
Extracellular	Young	F1RXI2_PIG	COL4A5
Extracellular	Young	PA21B_PIG	PLA2G1B
Extracellular	Young	CAP7_PIG	AZU1
Extracellular	Young	C3S7K6_PIG	S100A9
Extracellular	Young	I3LMK2_PIG	TFF2
Extracellular	Young	A0A286ZP41_PIG	PGC
Extracellular	Young	F1SCC9_PIG	LOC106504545
Extracellular	Young	F1RJX8_PIG	COPA
Extracellular	Young	NEC2_PIG	PCSK2
Extracellular	Young	A1AT_PIG	SERPINA1
Extracellular	Young	F2Z5B1_PIG	SERPINB1
Extracellular	Young	TENA_PIG	TNC
Extracellular	Young	COL_PIG	CLPS
Extracellular	Young	I3L9F5_PIG	PCYOX1
Extracellular	Young	PRP_PIG	LOC102162895
Extracellular	Young	F1SA65_PIG	FBN3
Extracellular	Young	Q6QR67_PIG	RETN
Extracellular	Young	PGS2_PIG	DCN
Extracellular	Young	F1S4T6_PIG	PNLIPRP2
Extracellular	Young	F1RJ50_PIG	LOC100517891
Extracellular	Young	A0A287A504_PIG	LOC100621421
Extracellular	Young	K7GNN0_PIG	VWF
Extracellular	Young	A0A287AVA9_PIG	LOC100153899
Extracellular	Young	F1RX35_PIG	FGG
Extracellular	Young	DMBT1_PIG	DMBT1
Extracellular	Young	K7GMF9_PIG	ANPEP
Extracellular	Young	BGH3_PIG	TGFBI
Extracellular	Young	F1S3G7_PIG	COL5A3
Extracellular	Young	F1SKM1_PIG	COL7A1
Extracellular	Young	F1S0M0_PIG	MATN2
Extracellular	Young	CO3_PIG	C3
Extracellular	Young	F1S4T9_PIG	PNLIP
Extracellular	Young	F1SH45_PIG	SERPINI2
Extracellular	Young	F6Q1W0_PIG	PNLIPRP1
Extracellular	Young	AMYP_PIG	AMY2
Extracellular	Young	TFF2_PIG	TFF2
Extracellular	Adult	F1RQZ0_PIG	GRN
Extracellular	Adult	I3LUR7_PIG	COL6A3
Extracellular	Adult	I3LQ84_PIG	COL6A2
Extracellular	Adult	F1S2B6_PIG	BGN
Extracellular	Adult	B2MG_PIG	B2M
Extracellular	Adult	A0A287A1S6_PIG	COL1A1
Extracellular	Adult	F1RYI8_PIG	COL3A1
Extracellular	Adult	A0A286ZWS8_PIG	COL2A1
Extracellular	Adult	F1SAE9_PIG	LAMB1
Extracellular	Adult	I3L781_PIG	COL1A2
Extracellular	Adult	A0A287BF88_PIG	COL5A2
Extracellular	Adult	F1RLL9_PIG	COL4A2
Extracellular	Adult	F1S663_PIG	LAMC1
Extracellular	Adult	F1S3G7_PIG	COL5A3
Extracellular	Adult	F1RLC4_PIG	LOX
Extracellular	Adult	PA21B_PIG	PLA2G1B
Extracellular	Adult	I3LL32_PIG	CHIA
Extracellular	Adult	F1SQ10_PIG	DCN
Extracellular	Adult	FBN1_PIG	FBN1
Extracellular	Adult	F1S4T9_PIG	PNLIP
Extracellular	Adult	I3LMK2_PIG	TFF2
Extracellular	Adult	A0A286ZP41_PIG	PGC
Extracellular	Adult	F1SCD0_PIG	LOC100153899
Extracellular	Adult	I3LQZ3_PIG	MUC6
Extracellular	Adult	COL_PIG	CLPS
Extracellular	Adult	TENA_PIG	TNC
Extracellular	Adult	F1S4T6_PIG	PNLIPRP2
Extracellular	Adult	F1RXR2_PIG	CRELD2
Extracellular	Adult	F1RPA7_PIG	GP2
Extracellular	Adult	A0A287A0A6_PIG	COL6A6
Extracellular	Adult	F1RPA9_PIG	UMOD
Extracellular	Adult	A0A287ALN1_PIG	NID2
Extracellular	Adult	F1S1C3_PIG	CA4
Extracellular	Adult	F1RSZ8_PIG	ENPP6
Extracellular	Adult	F1RGY5_PIG	NID1
Extracellular	Adult	I3LSV6_PIG	COL2A1
Extracellular	Adult	F1RKK1_PIG	FBN2
Extracellular	Adult	F1RSB4_PIG	EPX
Extracellular	Adult	F1SCC7_PIG	LOC396684
Extracellular	Adult	F1SVA2_PIG	TINAGL1
Extracellular	Adult	PGS2_PIG	DCN
Extracellular	Adult	K7GNN0_PIG	VWF
Extracellular	Adult	A7WLI1_PIG	CD81
Extracellular	Adult	F1SN69_PIG	COL27A1
Extracellular	Adult	F1SFA7_PIG	COL1A2
Extracellular	Adult	F1S0Y1_PIG	HMCN2
Extracellular	Adult	A0A287AVA9_PIG	LOC100153899
Extracellular	Adult
Macromolecular complex	Young	I3LUR7_PIG	COL6A3
Macromolecular complex	Young	I3LQ84_PIG	COL6A2
Macromolecular complex	Young	I3LSV6_PIG	COL2A1
Macromolecular complex	Young	F2Z5H6_PIG	ATP6V0D1
Macromolecular complex	Young	K7GS03_PIG	LRP1
Macromolecular complex	Young	RS3_PIG	RPS3
Macromolecular complex	Young	RACK1_PIG	RACK1
Macromolecular complex	Young	F1RIR2_PIG	STX4
Macromolecular complex	Young	A0A287BRP6_PIG	ERLIN2
Macromolecular complex	Young	ACTB_PIG	ACTB
Macromolecular complex	Young	A0A287AHK8_PIG	SNAP23
Macromolecular complex	Young	I3LQN4_PIG	PHB2
Macromolecular complex	Young	Q1HNM7_PIG	COL1A1
Macromolecular complex	Young	M3V819_PIG	COL4A1
Macromolecular complex	Young	Q1T7A9_PIG	COL6A1
Macromolecular complex	Young	Q59IP3_PIG	COL5A1
Macromolecular complex	Young	D5KRL1_PIG	COL21A1
Macromolecular complex	Young	Q1T7A8_PIG	COL6A1
Macromolecular complex	Young	F1SKX7_PIG	COL8A1
Macromolecular complex	Young	F1RLC4_PIG	LOX
Macromolecular complex	Young	F1RXI2_PIG	COL4A5
Macromolecular complex	Young	A0A286ZV23_PIG	EGFR
Macromolecular complex	Young	I3LBB2_PIG	VPS35
Macromolecular complex	Young	F1S3P8_PIG	STX7
Macromolecular complex	Young	C0MHR2_PIG	CLTC
Macromolecular complex	Young	F1RFQ6_PIG	STX2
Macromolecular complex	Young	A0A287A905_PIG	ANO6
Macromolecular complex	Young	F1S455_PIG	TMEM231
Macromolecular complex	Young	F1SGT4_PIG	CD44
Macromolecular complex	Young	HS90A_PIG	HSP90AA1
Macromolecular complex	Young	A0A286ZVL0_PIG	HNRNPU
Macromolecular complex	Young	A0A287A007_PIG	COL4A5
Macromolecular complex	Young	A0A287ALW2_PIG	CXADR
Macromolecular complex	Young	F1SP85_PIG	TEK
Macromolecular complex	Young	CAV2_PIG	CAV2
Macromolecular complex	Young	F1RKY1_PIG	SNAP29
Macromolecular complex	Young	F1RGA3_PIG	STX1A
Macromolecular complex	Adult	I3LUR7_PIG	COL6A3
Macromolecular complex	Adult	I3LQ84_PIG	COL6A2
Macromolecular complex	Adult	F1RLC4_PIG	LOX
Macromolecular complex	Adult	K7GS03_PIG	LRP1
Macromolecular complex	Adult	A0A287AHK8_PIG	SNAP23
Macromolecular complex	Adult	Q1HNM7_PIG	COL1A1
Macromolecular complex	Adult	Q59IP3_PIG	COL5A1
Macromolecular complex	Adult	I3LSV6_PIG	COL2A1
Macromolecular complex	Adult	A0A287BRP6_PIG	ERLIN2
Macromolecular complex	Adult	M3V819_PIG	COL4A1
Macromolecular complex	Adult	F1SUX4_PIG	NUMA1
Macromolecular complex	Adult
Other	Young	K7GS03_PIG	LRP1
Other	Young	RS3_PIG	RPS3
Other	Young	RACK1_PIG	RACK1
Other	Young	F1RIR2_PIG	STX4
Other	Young	A0A287BRP6_PIG	ERLIN2
Other	Young	ACTB_PIG	ACTB
Other	Young	A0A287AHK8_PIG	SNAP23
Other	Young	I3LQN4_PIG	PHB2
Other	Young	DPP4_PIG	DPP4
Other	Young	F1RX37_PIG	FGB
Other	Young	DPEP1_PIG	DPEP1
Other	Young	F1RK12_PIG	ITM2B
Other	Young	I3LJY8_PIG	HSD17B12
Other	Young	F1RZM4_PIG	LAMA4
Other	Young	F1RPA7_PIG	GP2
Other	Young	F1SLE7_PIG	DYSF
Other	Young	CAV1_PIG	CAV1
Other	Young	F1RNA6_PIG	FLOT2
Other	Young	F1RWT7_PIG	AMOT
Other	Young	A0A287AUN4_PIG	VAMP5
Other	Young	F1S829_PIG	WLS
Other	Young	F1RN44_PIG	LAMP1
Other	Young	A5GFS1_PIG	ATP9A
Other	Young	FLOT1_PIG	FLOT1
Other	Young	B9ZSM8_PIG	CD90
Other	Young	K7GP66_PIG	ITGB4
Other	Young	A0A287A9D0_PIG	PTPRC
Other	Young	F1SM35_PIG	ATP8B1
Other	Young	AT1B1_PIG	ATP1B1
Other	Young	AQP1_PIG	AQP1
Other	Young	F1SHN1_PIG	CNTN1
Other	Young	A0A286ZV95_PIG	TMED10
Other	Young	AMPE_PIG	ENPEP
Other	Young	Q56P20_PIG	ARF4
Other	Young	K9J6J2_PIG	STOM_tv1
Other	Young	F1SML5_PIG	LRRC4
Other	Young	K7GN08_PIG	L1CAM
Other	Young	F1S1B2_PIG	MPZ
Other	Young	G8GCE6_PIG	CAV2
Other	Young	F1RM08_PIG	SLC1A5
Other	Young	A0A287BJK5_PIG	PLPP3
Other	Young	ADA10_PIG	ADAM10
Other	Young	EGLN_PIG	ENG
Other	Young	K7GS94_PIG	ITGB1
Other	Young	A8DSD5_PIG	ITGB2
Other	Young	F1SMF4_PIG	ITGA2
Other	Young	F1SRM1_PIG	MYO10
Other	Young	F2Z5K3_PIG	RAP1A
Other	Young	CD59_PIG	CD59
Other	Young	F1RZR0_PIG	ITPR3
Other	Young	F1S1D6_PIG	ATP6V0A1
Other	Young	C3VML0_PIG	CLDN4
Other	Young	F1SJM4_PIG	MME
Other	Young	VDAC1_PIG	VDAC1
Other	Young	A0A0K1TQQ0_PIG	MGST2
Other	Young	K7GRJ7_PIG	ATP2B3
Other	Young	Q8SPA1_PIG	SLA-DQB
Other	Young	A7XP04_PIG	SLA-DRB1
Other	Young	A0A172Q3W6_PIG	SLA-DQA
Other	Young	Q31064_PIG	SLA-DR-alpha
Other	Young	A0A0A7C0G6_PIG	SLA-2
Other	Young	Q8HX68_PIG	SLA-1
Other	Young	L7WHJ6_PIG	SLA-1
Other	Young	Q0MRZ9_PIG	SLA
Other	Young	Q8SPB3_PIG	SLA-B
Other	Young	A0A286ZV23_PIG	EGFR
Other	Young	I3LBB2_PIG	VPS35
Other	Young	F1S3P8_PIG	STX7
Other	Young	F1RFQ6_PIG	STX2
Other	Young	F1S455_PIG	TMEM231
Other	Young	F1SGT4_PIG	CD44
Other	Young	HS90A_PIG	HSP90AA1
Other	Young	A0A286ZVL0_PIG	HNRNPU
Other	Young	F1SBB5_PIG	NPC1
Other	Young	K7GT68_PIG	ITGA6
Other	Young	K7GQN2_PIG	FAP
Other	Young	C163A_PIG	CD163
Other	Young	F1RGY5_PIG	NID1
Other	Young	A0A286ZRU9_PIG	SERPINH1
Other	Young	A0A287BD93_PIG	CNP
Other	Young	CAP7_PIG	AZU1
Other	Young	C3S7K6_PIG	S100A9
Other	Young	NEC2_PIG	PCSK2
Other	Young	CDC42_PIG	CDC42
Other	Young	ARF6_PIG	ARF6
Other	Young	F2Z5F2_PIG	RAB10
Other	Young	F1RYT3_PIG	SCARB2
Other	Young	F1SB67_PIG	IGF2R
Other	Young	A0A287A649_PIG	EMP2
Other	Young	F1RW75_PIG	DSP
Other	Young	F1SR53_PIG	ITGA5
Other	Young	B2ZI35_PIG	F11R
Other	Young	A0A286ZSD7_PIG	STOML2
Other	Young	Q95JH1_PIG	CD61
Other	Young	I3LKU0_PIG	RAC2
Other	Young	PLAK_PIG	Jup
Other	Young	Q06AS6_PIG	GNAI2
Other	Young	F2Z5K4_PIG	RHOC
Other	Young	COF1_PIG	CFL1
Other	Young	F1SM72_PIG	NCAM1
Other	Young	A0A287BHK8_PIG	ADAM22
Other	Young	K7GN83_PIG	BST1
Other	Young	A0A287BIL8_PIG	HSPA5
Other	Young	I3L719_PIG	DPEP1
Other	Young	F1SMF6_PIG	ITGA1
Other	Young	F1RFL9_PIG	ATP6V0A2
Other	Young	I3L6W6_PIG	DNAJC1
Other	Young	F1RVP8_PIG	TCIRG1
Other	Young	F1SGJ4_PIG	ABHD6
Other	Young	GNA11_PIG	GNA11
Other	Young	PRAF3_PIG	ARL6IP5
Other	Young	A0A287A5T0_PIG	TMEM30A
Other	Young	CML1_PIG	CMLKR1
Other	Young	C6EVT4_PIG	CDH1
Other	Young	PECA1_PIG	PECAM1
Other	Young	F1S8P1_PIG	SCCPDH
Other	Young	F1RSY4_PIG	SMPD2
Other	Young	F1RF26_PIG	SERINC5
Other	Young	XPP2_PIG	XPNPEP2
Other	Young	FOLH1_PIG	FOLH1
Other	Young	Q8MGP9_PIG	SLA-DQB
Other	Young	A0A0A7BZH1_PIG	SLA-DQB1
Other	Young	Q4ZJG0_PIG	SLA-DQA
Other	Young	Q8MGW9_PIG	SLA-DRB
Other	Young	A0A0A7C0G4_PIG	SLA-1
Other	Young	B6ICW9_PIG	SLA-11
Other	Young	F1S8P6_PIG	MFSD10
Other	Young	F1SRD2_PIG	ANO10
Other	Young	Q2QEH5_PIG	SLCO2A1
Other	Young	C3VPJ4_PIG	CLDN7
Other	Young	A5D9L3_PIG	SLA-DMB
Other	Young	A0A286ZR24_PIG	LOC100621657
Other	Young	A0A024CBD6_PIG	CD46
Other	Young	RADI_PIG	RDX
Other	Young	A0A287ALW2_PIG	CXADR
Other	Young	CAV2_PIG	CAV2
Other	Young	F1RKY1_PIG	SNAP29
Other	Young	DMBT1_PIG	DMBT1
Other	Young	F1SN90_PIG	SLC31A2
Other	Young	K7GR16_PIG	KIRREL1
Other	Young	AT1A1_PIG	ATP1A1
Other	Young	F4ZS19_PIG	PLSCR1
Other	Young	F1RW46_PIG	SYP
Other	Young	C3VML1_PIG	CLDN5
Other	Young	F1SIC6_PIG	CD276
Other	Young	I3L9I6_PIG	BCAM
Other	Young	O19240_PIG	PA14
Other	Young	A0A0N9E903_PIG	SLA-1
Other	Young	A0A172Q3Y5_PIG	SLA-DQA
Other	Young	B1PJV4_PIG	SLA-1
Other	Young	C3VPJ5_PIG	CLDN3
Other	Young	F1RGA3_PIG	STX1A
Other	Young	B1A9N2_PIG	SLA-DRB1
Other	Young	V9PQW0_PIG	SLA-DQB1
Other	Young	B1A9M5_PIG	SLA-DQB1
Other	Young	Q6Y1I7_PIG	SLA-DRB
Other	Young	Q8MHS9_PIG	SLA-DQB
Other	Young	Q8MGX1_PIG	SLA-DQB
Other	Young	Q860P3_PIG	SLA-DRB
Other	Young	Q7YNW7_PIG	SLA-DRA1
Other	Young	Q2PT69_PIG	SLA-2
Other	Young	B1A9N7_PIG	SLA-2
Other	Young	Q8MHT8_PIG	SLA-3
Other	Young	A0A1C9J6F0_PIG	SLA-2
Other	Young	A0A0A7BZF2_PIG	SLA-1
Other	Adult	K7GS03_PIG	LRP1
Other	Adult	A0A287AHK8_PIG	SNAP23
Other	Adult	F1RPA7_PIG	GP2
Other	Adult	CAV1_PIG	CAV1
Other	Adult	A0A287AUN4_PIG	VAMP5
Other	Adult	Q95JH1_PIG	CD61
Other	Adult	AMPE_PIG	ENPEP
Other	Adult	K9J6J2_PIG	STOM_tv1
Other	Adult	G8GCE6_PIG	CAV2
Other	Adult	K7GS94_PIG	ITGB1
Other	Adult	CD59_PIG	CD59
Other	Adult	VDAC1_PIG	VDAC1
Other	Adult	I6W9Q3_PIG	SLA-1
Other	Adult	Q8SPC4_PIG	SLA-DQB
Other	Adult	Q6Y1I7_PIG	SLA-DRB
Other	Adult	Q31064_PIG	SLA-DR-alpha
Other	Adult	Q8SPB5_PIG	SLA-DQB
Other	Adult	Q8SPA1_PIG	SLA-DQB
Other	Adult	A0A172Q3W6_PIG	SLA-DQA
Other	Adult	A0A172Q3Y5_PIG	SLA-DQA
Other	Adult	A0A0N9JNW5_PIG	SLA-2
Other	Adult	L7WPB3_PIG	SLA-1
Other	Adult	D6C4F4_PIG	SLA-1
Other	Adult	A0A287BRP6_PIG	ERLIN2
Other	Adult	F1RPA9_PIG	UMOD
Other	Adult	F1RGY5_PIG	NID1
Other	Adult	F1RN44_PIG	LAMP1
Other	Adult	B9ZSM8_PIG	CD90
Other	Adult	K7GP66_PIG	ITGB4
Other	Adult	F1SR53_PIG	ITGA5
Other	Adult	F1S1B2_PIG	MPZ
Other	Adult	ADA10_PIG	ADAM10
Other	Adult	A0A287BJK5_PIG	PLPP3
Other	Adult	F1SMF4_PIG	ITGA2
Other	Adult	F1SMF6_PIG	ITGA1
Other	Adult	Q860U2_PIG	SLA-DQB1
Other	Adult	Q860P3_PIG	SLA-DRB
Other	Adult	A0A0A7BZS1_PIG	SLA-2
Other	Adult	L7WHJ6_PIG	SLA-1
Other	Adult	Q0GA96_PIG	SLA-DQA
Other	Adult	A0A024CBD6_PIG	CD46
Other	Adult	PLAK_PIG	Jup
Other	Adult	Q8MGQ2_PIG	SLA-DRB
Other	Adult	Q8MGP9_PIG	SLA-DQB
Other	Adult	Q8MHU4_PIG	SLA-B
Other	Adult	F1S0Y1_PIG	HMCN2
Other	Adult	B1PJU8_PIG	SLA-1
Other	Adult	A0A0A7BZF2_PIG	SLA-1
